# Supplementary material for: Asymmetric total syntheses of sarglamides A, C, D, E, and F
Source: Royal Society of Chemistry journal article supplement (doi:10.1039/d4sc03553d), 2024-01-01
Supplement: d4sc03553d1.pdf [file d4sc03553d1.pdf]

## Supporting Information

# Asymmetric Total Syntheses of Sarglamides A, C, D, E and F

*R. Kim, Y. Wu, R. Tong\**

## Supporting Information

### Contents

|                                                                            |           |
|----------------------------------------------------------------------------|-----------|
| <b>1. Experimental Section</b> .....                                       | <b>2</b>  |
| <b>1.1 General Information:</b> .....                                      | <b>2</b>  |
| <b>1.2 General Experimental Procedures and Characterization Data</b> ..... | <b>3</b>  |
| <b>1.2.1 Preparation of Diels-Alder products</b> .....                     | <b>3</b>  |
| <b>1.2.2 Preparation of sarglamide E (5)</b> .....                         | <b>5</b>  |
| <b>1.2.3 Preparation of Sarglamide F (17)</b> .....                        | <b>13</b> |
| <b>1.2.4 Preparation of Sarglamide A (1)</b> .....                         | <b>16</b> |
| <b>1.2.5 Preparation of Sarglamide C (3)</b> .....                         | <b>21</b> |
| <b>1.2.6 Preparation of Sarglamide D (4)</b> .....                         | <b>25</b> |
| <b>1.2.7 Preparation of compound 10c and 9c</b> .....                      | <b>28</b> |
| <b>1.3 NMR Data Comparison<sup>[3]</sup></b> .....                         | <b>30</b> |
| <b>2. Crystallographic data</b> .....                                      | <b>46</b> |
| <b>3. References</b> .....                                                 | <b>48</b> |
| <b>4. <sup>1</sup>H and <sup>13</sup>C NMR Spectra</b> .....               | <b>49</b> |

# 1. Experimental Section

## 1.1 General Information:

Reactions were carried out in oven or flame-dried glassware under a nitrogen atmosphere, unless otherwise noted. Tetrahydrofuran (THF) was freshly distilled before use from sodium using benzophenone as indicator. Dichloromethane was freshly distilled before use from calcium hydride ( $\text{CaH}_2$ ). All other solvents were dried over 3Å or 4Å molecular sieves. Solvents used in workup, extraction and column chromatography were used as received from commercial suppliers without prior purification. Reactions were magnetically stirred and monitored by thin layer chromatography (TLC, 0.25 mm) on Merck pre-coated silica gel plates. Flash chromatography was performed with silica gel 60 (particle size 0.040 – 0.062 mm) supplied by Grace.  $^1\text{H}$  and  $^{13}\text{C}$  NMR spectra were recorded on a Bruker AV-400 spectrometer (400 MHz for  $^1\text{H}$ , 101 MHz for  $^{13}\text{C}$ ). Chemical shifts are reported in parts per million (ppm) as values relative to the internal chloroform (7.26 ppm for  $^1\text{H}$  and 77.0 ppm for  $^{13}\text{C}$ ), dichloromethane (5.32 ppm for  $^1\text{H}$  and 53.84 ppm for  $^{13}\text{C}$ ) or methanol (3.31 ppm for  $^1\text{H}$  and 49.00 ppm for  $^{13}\text{C}$ ). Abbreviations for signal coupling are as follows: s, singlet; d, doublet; t, triplet; q, quartet; m, multiplet. Optical rotations were measured on a JASCO Perkin-Elmer model P-2000 polarimeter. High resolution mass spectra were measured at the Hong Kong University of Science and Technology Mass Spectrometry Service Center on either an Agilent GC/MS 5975C system or an API QSTAR XL System.

## 1.2 General Experimental Procedures and Characterization Data

### 1.2.1 Preparation of Diels-Alder products<sup>[1]</sup>

#### Compound 8a

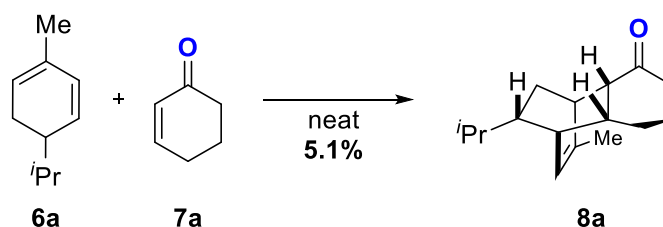

To a round-bottom flask cyclohexanone **7a** (192 mg, 2.0 mmol, 1.0 equiv.) under argon atmosphere, were added  $\alpha$ -phellandrene **6a** (1.36 g, 10.0 mmol, 5.0 equiv.) in one pot. After being stirred for overnight at room temperature, the reaction mixture was purified by flash chromatography on silica gel (eluent: Acetone/*n*-Hexane, 1/20) to give compound **8a** (23.1 mg, yield: 5.1%) as a white powder.

**Rf** = 0.6 (silica, Acetone/*n*-Hexane, 1/20);

**<sup>1</sup>H NMR** (400 MHz, CDCl<sub>3</sub>):  $\delta$  = 5.59 (d, 1H), 2.90 – 2.83 (m, 1H), 2.49 – 2.41 (m, 2H), 2.40 – 2.23 (m, 2H), 2.12 – 1.97 (m, 1H), 1.86 – 1.62 (m, 7H), 1.31 – 1.23 (m, 1H), 1.11 – 1.01 (m, 1H), 1.00 – 0.92 (m, 1H), 0.93 – 0.88 (m, 1H), 0.86 (d,  $J$  = 6.5 Hz, 3H), 0.78 (d,  $J$  = 6.5 Hz, 3H) ppm;

**<sup>13</sup>C NMR** (101 MHz, CDCl<sub>3</sub>):  $\delta$  = 214.7, 143.0, 123.1, 51.8, 47.3, 43.8, 39.5, 39.0, 37.3, 33.3, 31.2, 29.2, 21.2, 21.0, 20.9, 20.5 ppm;

**HRMS (ESI, TOF)**: calculated for [C<sub>16</sub>H<sub>25</sub>O]<sup>+</sup> 233.1900, found 233.1901.



## Compound 8b

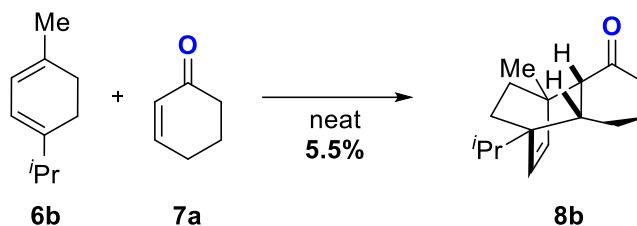

To a round-bottom flask cyclohexanone **7a** (192 mg, 2.0 mmol, 1.0 equiv.) under argon atmosphere, were added  $\alpha$ -terpinene **6b** (1.36 g, 10.0 mmol, 5.0 equiv.) in one pot. After being stirred for overnight at room temperature, the reaction mixture was purified by flash chromatography on silica gel (eluent: Acetone/*n*-Hexane, 1/20) to give compound **8b** (25.4 mg, yield: 5.5%) as a white powder.

**R<sub>f</sub>** = 0.6 (silica, Acetone/*n*-Hexane, 1/20);

**<sup>1</sup>H NMR** (400 MHz, CDCl<sub>3</sub>):  $\delta$  = 6.19 (d,  $J$  = 8.4 Hz, 1H), 5.82 (d,  $J$  = 8.4 Hz, 1H), 2.88 (d,  $J$  = 10.7 Hz, 1H), 2.52 (p,  $J$  = 6.9 Hz, 1H), 2.31 (dddt,  $J$  = 13.7, 9.2, 3.4, 1.1 Hz, 1H), 2.21 (td,  $J$  = 10.7, 5.2 Hz, 1H), 2.09 (ddd,  $J$  = 16.1, 9.4, 8.0 Hz, 1H), 1.88 – 1.73 (m, 2H), 1.69 – 1.62 (m, 1H), 1.50 – 1.38 (m, 1H), 1.37 – 1.28 (m, 1H), 1.28 – 1.19 (m, 1H), 1.19 – 1.11 (m, 1H), 1.09 (s, 3H), 0.98 – 0.89 (m, 1H), 0.92 (d,  $J$  = 7.0 Hz, 3H), 0.81 (d,  $J$  = 6.9 Hz, 3H) ppm;

**<sup>13</sup>C NMR** (101 MHz, CDCl<sub>3</sub>):  $\delta$  = 214.5, 137.1, 135.6, 57.0, 49.3, 42.5, 38.7, 36.6, 36.5, 29.5, 25.5, 22.8, 22.5, 21.1, 18.7, 16.8 ppm;

**HRMS (ESI, TOF)**: calculated for [C<sub>16</sub>H<sub>25</sub>O]<sup>+</sup> 233.1900, found 233.1904.

## 1.2.2 Preparation of sarglamide E (5)

### Compound S1

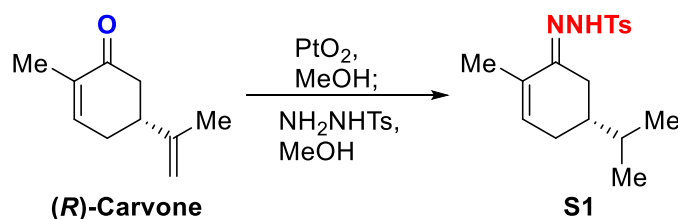

To a stirred suspension of PtO<sub>2</sub> (2.95 g, 13 mmol, 0.02 mol%) in MeOH (650 mL) was added (R)-Carvone (100 mL, 650 mmol, 1.0 equiv.) at room temperature. The mixture was evacuated and refilled with hydrogen gas and stirred at the same temperature for 2 days. The reaction was monitored by <sup>1</sup>H-NMR with a small amount of the reaction mixture. The reaction mixture was filtered through a celite pad with diethyl ether. The filtrate was concentrated under reduced pressure. The resulting crude enone was used directly for the next step without further purification.

To a solution of the abovementioned crude enone in MeOH (650 mL) under argon atmosphere, was added 4-Methylbenzenesulfonylhydrazide (127.1 g, 682 mmol, 1.05 equiv.) in one portion at room temperature. The resulting mixture was heated to 70 °C and stirred for additional 2 h. The reaction was cooled to 25 °C, and then concentrated under reduced pressure. The resulting residue was used directly without further purification.

### Compound 6a

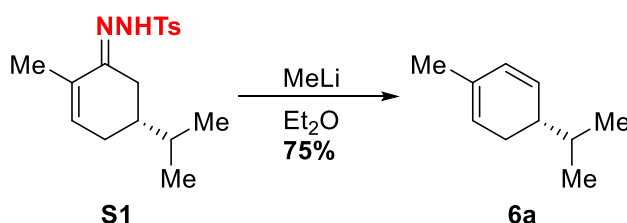

To a cooled (0 °C) solution of the crude hydrazone (25.6 g, 80 mmol, 1 equiv.) obtained above in diethyl ether (320 mL) under argon atmosphere, was added MeLi (100 mL, 160 mmol, 2.0 equiv., 1.6 M in Et<sub>2</sub>O) dropwise over 0.5 h at the same temperature. After being stirred for another 4 h at room temperature, the resulting mixture was allowed to stir at 0 °C for another

0.5 h, the reaction was quenched with a saturated aqueous  $\text{NH}_4\text{Cl}$  solution over 20 min. The mixture was allowed to warm to room temperature, the organic layer was collected, and aqueous phase was extracted with pentane ( $4 \times 200$  mL). The combined organic phases were washed with brine, dried over anhydrous  $\text{Na}_2\text{SO}_4$ , filtered, and concentrated under reduced pressure. The residue was purified by flash chromatography on silica gel (eluent: Pentane only) to give (*S*)-(+)- $\alpha$ -phellandrene **6a**<sup>[2]</sup> (8.17 g, 60 mmol, yield: 75%) as a colorless oil.

## Compound 8

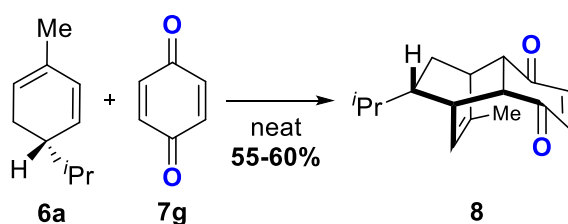

Procedure A (*Neat condition*): To a round-bottom flask 1,4-Benzoquinone (3.56 g, 33 mmol, 1.0 equiv.) under argon atmosphere, were added (*S*)-(+)- $\alpha$ -phellandrene (15.7 g, 115.5 mmol, 3.5 equiv.) obtained above in one pot. After being stirred for 7 days at room temperature, the reaction mixture was purified by flash chromatography on silica gel (eluent: Pentane only to EtOAc/*n*-Hexane, 1/9) to give compound **8** (4.91 g, yield: 60%) as a yellow solid.

Procedure B (*EtOH/H<sub>2</sub>O as solvent*): To a round-bottom flask 1,4-Benzoquinone (21.6 g, 200 mmol, 1.0 equiv.) under argon atmosphere in EtOH/ $\text{H}_2\text{O}$  (500 mL, 1/1), were added (*S*)-(+)- $\alpha$ -phellandrene (32.8 g, 241 mmol, 1.2 equiv.) obtained above in one pot. After being stirred for 1 h at reflux temperature,  $\text{Et}_2\text{O}$  (200 mL) was then added, and the organic layer was separated. The aqueous phase was extracted with  $\text{Et}_2\text{O}$  ( $4 \times 500$  mL). The combined organic phases were washed with brine, dried over anhydrous  $\text{Na}_2\text{SO}_4$  and  $\text{MgSO}_4$ , filtered, and concentrated under reduced pressure. The residue was purified by flash chromatography on silica gel to give compound **8** (26.8 g, yield: 55%)

**R<sub>f</sub>** = 0.4 (silica, EtOAc/*n*-Hexane = 1:4);

**[ $\alpha$ ]<sub>D</sub><sup>25</sup>** = +35.7 (*c* 1.0, DCM);

**<sup>1</sup>H NMR** (400 MHz,  $\text{CDCl}_3$ ):  $\delta$  = 6.63 (s, 2H), 5.67 (d, *J* = 6.4 Hz, 1H), 3.19 (dt, *J* = 6.3, 2.3

Hz, 1H), 2.97 – 2.91 (m, 2H), 2.87 (dd,  $J = 9.1, 2.5$  Hz, 1H), 1.86 (ddd,  $J = 13.0, 9.2, 2.5$  Hz, 1H), 1.66 (d,  $J = 1.7$  Hz, 3H), 1.40 (tdd,  $J = 9.3, 5.4, 2.0$  Hz, 1H), 1.10 – 0.99 (m, 2H), 0.89 (d,  $J = 6.5$  Hz, 3H), 0.78 (d,  $J = 6.5$  Hz, 3H) ppm;

$^{13}\text{C}$  NMR (101 MHz,  $\text{CDCl}_3$ ):  $\delta = 199.8, 199.5, 142.5, 142.4, 141.6, 123.2, 50.7, 48.6, 45.6, 41.7, 39.2, 33.3, 31.7, 21.0, 20.7, 20.2$  ppm;

HRMS (ESI, TOF): calculated for  $[\text{C}_{16}\text{H}_{20}\text{O}_2 + \text{Na}]^+$  267.1356, found 267.1368.

### Compound 10a and 10b

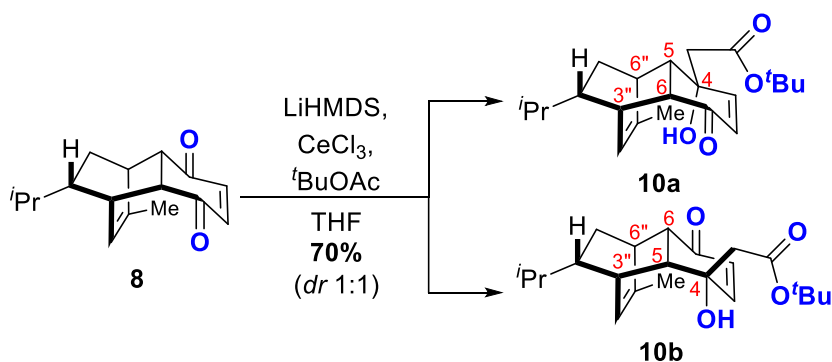

$\text{CeCl}_3 \cdot 7\text{H}_2\text{O}$  (18.6 g, 50.0 mmol, 1.0 equiv.) was added to a Schlenk tube (250 mL) and evacuated. The tube was immersed in a pre-heated oil bath (140 °C) with evacuation, while the water was trapped by liquid nitrogen. After 1 h heating without stirring, the cerium chloride was completely dried by a vigorous stirring at the same temperature for an additional 2 h. While the flask was still hot, the flask was filled with argon gas and then cooled to 0 °C. Freshly distilled THF (100 mL) was added to the flask containing cerium chloride at the same temperature and allowed to stir for another 2 h at room temperature.

To a cooled (-78 °C) solution of LiHMDS (50.0 mL, 50.0 mmol, 1.0 equiv., 1.0 M in THF) under argon atmosphere in THF (50 mL), was added  $t\text{-BuOAc}$  (6.7 mL, 50.0 mmol, 1.0 equiv.). After 1.5 h of stirring at -78 °C, the mixture containing cerium chloride made *in situ* above was added dropwise and stirred at -78 °C for another 2 h.

After being stirred for 2 h, the mixture was added to compound **8** (12.2 g, 50.0 mmol, 1.0 equiv.) in THF (50 mL) dropwise at -78 °C. After the addition, the reaction mixture was allowed to stir

for an additional 2 h at the same temperature. The mixture was quenched with saturated aqueous NH<sub>4</sub>Cl. Et<sub>2</sub>O (100 mL) and H<sub>2</sub>O (100 mL) were then added, and the organic layer was separated. The aqueous phase was extracted with Et<sub>2</sub>O (4 × 100 mL). The combined organic phases were washed with brine, dried over anhydrous Na<sub>2</sub>SO<sub>4</sub> and MgSO<sub>4</sub>, filtered, and concentrated under reduced pressure. The residue was purified by flash chromatography on silica gel (eluent: DCM/Et<sub>2</sub>O/*n*-Hexane, 1/1/4 to 2/2/4) to give compound **10a** (6.3 g, 17.5 mmol) and compound **10b** (6.3 g, 17.5 mmol) respectively as a pale-yellow oil in 70% yield in total.

#### Compound 10a:

**R<sub>f</sub>** = 0.35 (silica, DCM/Et<sub>2</sub>O/*n*-Hexane = 1:1:3);

**[α]<sub>D</sub><sup>25</sup>** = +27.8 (*c* 1.0, DCM);

**<sup>1</sup>H NMR** (400 MHz, CDCl<sub>3</sub>): δ = 6.57 (dd, *J* = 10.3, 1.8 Hz, 1H), 5.75 (d, *J* = 10.3 Hz, 1H), 5.59 – 5.28 (m, 1H), 3.01 (ddd, *J* = 6.3, 3.7, 1.5 Hz, 1H), 2.89 (dq, *J* = 3.3, 1.5 Hz, 1H), 2.63 (dd, *J* = 8.3, 3.7 Hz, 1H), 2.49 (d, *J* = 15.9 Hz, 1H), 2.39 (d, *J* = 15.9 Hz, 1H), 2.21 (dt, *J* = 8.4, 1.7 Hz, 1H), 1.72 (d, *J* = 1.7 Hz, 3H), 1.70 – 1.58 (m, 1H), 1.44 (s, 9H), 1.40 – 1.28 (m, 1H), 1.10 (dh, *J* = 9.0, 6.5 Hz, 1H), 0.92 (d, *J* = 6.4 Hz, 1H), 0.87 (d, *J* = 6.6 Hz, 3H), 0.77 (d, *J* = 6.6 Hz, 3H) ppm;

**<sup>13</sup>C NMR** (101 MHz, CDCl<sub>3</sub>): δ = 200.9, 171.6, 150.5, 144.5, 130.4, 121.8, 82.6, 70.1, 50.5, 49.7, 44.4, 44.0, 40.1, 35.4, 34.6, 33.2, 28.0, 21.2, 20.4, 20.2 ppm;

**HRMS (ESI, TOF)**: calculated for [C<sub>22</sub>H<sub>32</sub>O<sub>4</sub>Si+Na]<sup>+</sup> 383.2193, found 383.2195.

#### Compound 10b:

**R<sub>f</sub>** = 0.35 (silica, DCM/Et<sub>2</sub>O/*n*-Hexane = 1:1:3);

**[α]<sub>D</sub><sup>25</sup>** = +53.4 (*c* 1.0, DCM);

**<sup>1</sup>H NMR** (400 MHz, CDCl<sub>3</sub>): δ = 6.60 (dd, *J* = 10.3, 1.5 Hz, 1H), 5.84 (d, *J* = 10.3 Hz, 1H), 5.70 (dt, *J* = 6.3, 1.8 Hz, 1H), 3.17 – 3.10 (m, 1H), 2.77 (dt, *J* = 3.4, 1.6 Hz, 1H), 2.73 (dd, *J* = 8.5, 3.5 Hz, 1H), 2.50 (d, *J* = 15.9 Hz, 1H), 2.40 (d, *J* = 15.9 Hz, 1H), 2.21 (dt, *J* = 8.6, 1.6 Hz,

1H), 1.78 (ddd,  $J = 13.1, 9.1, 2.3$  Hz, 1H), 1.56 (d,  $J = 1.7$  Hz, 3H), 1.44 (s, 9H), 1.18 (dddd,  $J = 9.3, 6.6, 4.2, 2.0$  Hz, 1H), 1.09 – 0.95 (m, 2H), 0.87 (d,  $J = 6.5$  Hz, 3H), 0.75 (d,  $J = 6.5$  Hz, 3H) ppm;

$^{13}\text{C}$  NMR (101 MHz,  $\text{CDCl}_3$ ):  $\delta = 13\text{C}$  NMR (101 MHz,  $\text{CDCl}_3$ )  $\delta$  200.0, 171.5, 152.8, 139.7, 129.3, 124.7, 82.5, 70.0, 49.6, 49.1, 48.3, 47.3, 43.1, 33.2, 32.8, 30.7, 28.0, 21.1, 20.8, 20.4 ppm;

HRMS (ESI, TOF): calculated for  $[\text{C}_{22}\text{H}_{32}\text{O}_4\text{Si}+\text{Na}]^+$  383.2193, found 383.2199.

## Compound 9b

**Table 1.** Optimization of cycloetherification and intramolecular *oxa*-Michael addition

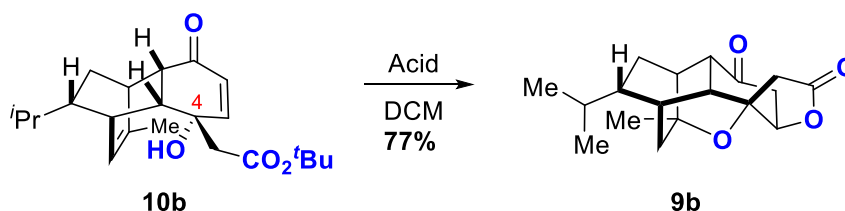

| Entry | Acid (1.0 eq.)                    | Temp (°C) | <b>9b</b> Yield (%) |
|-------|-----------------------------------|-----------|---------------------|
| 1     | <i>p</i> -TsOH                    | 25-40     | Complex             |
| 2     | Amberlyst-15                      | 25-40     | 74                  |
| 3     | CSA                               | 25        | No Pdt              |
| 4     | PPTS                              | 25-40     | NR                  |
| 5     | $\text{BF}_3\text{-Et}_2\text{O}$ | 25        | 77                  |
| 6     | TMSOTf                            | 25        | 74                  |
| 7     | TBSOTf                            | 25        | 74                  |
| 8     | $\text{Sc}(\text{OTf})_3$         | 25        | NR                  |
| 9     | $\text{FeCl}_3$                   | 25        | <b>78</b>           |

[a] Reaction conditions: **11b** (0.035 mmol), Lewis acid (0.035 mmol), and DCM (0.5 mL) were mixed and stirred at room or specified temperature under  $\text{N}_2$  atmosphere. [b] NMR yield with  $\text{CH}_2\text{Br}_2$  as internal standard.

To a solution of compound **10b** (1.56 g, 4.33 mmol, 1.0 equiv.) in DCM (45 mL) under argon atmosphere, was added FeCl<sub>3</sub> (702 mg, 4.33 mmol, 1.0 equiv.). After being stirred for 1 h at the same temperature, the reaction mixture was quenched with saturated aqueous NaHCO<sub>3</sub>, and the organic layer was separated. The aqueous phase was extracted with DCM (3 × 30 mL). The combined organic phases were washed with brine, dried over anhydrous Na<sub>2</sub>SO<sub>4</sub>, filtered, and concentrated under reduced pressure. The residue was purified by flash chromatography on silica gel (eluent: EtOAc/*n*-Hexane, 1/4) to give the corresponding pentacyclic **9b** (1.02 g, yield: 77%) as a white powder.

**Rf** = 0.3 (silica, EtOAc/*n*-Hexane = 1:4);

**[α]<sub>D</sub><sup>25</sup>** = -33.1 (*c* 1.0, DCM);

**<sup>1</sup>H NMR** (400 MHz, CDCl<sub>3</sub>): δ = 4.37 (t, *J* = 8.1 Hz, 1H), 3.00 (dd, *J* = 13.1, 8.0 Hz, 1H), 2.90 (d, *J* = 17.2 Hz, 1H), 2.75 (d, *J* = 17.4 Hz, 1H), 2.65 (dd, *J* = 13.2, 8.1 Hz, 1H), 2.58 – 2.51 (m, 1H), 2.32 (d, *J* = 4.6 Hz, 1H), 2.26 (d, *J* = 5.9 Hz, 1H), 2.17 (t, *J* = 6.5 Hz, 1H), 1.81 (ddd, *J* = 12.8, 7.8, 4.7 Hz, 1H), 1.53 – 1.47 (m, 1H), 1.46 – 1.32 (m, 3H), 1.10 – 1.04 (m, 1H), 1.08 (s, 3H), 0.90 (t, *J* = 6.2 Hz, 6H) ppm;

**<sup>13</sup>C NMR** (101 MHz, CDCl<sub>3</sub>): δ = 208.5, 173.3, 81.1, 78.4, 76.1, 45.8, 42.2, 41.9, 41.3, 40.2, 35.0, 31.6, 29.5, 29.5, 27.0, 23.5, 21.5, 20.2 ppm;

**HRMS (ESI, TOF)**: calculated for [C<sub>18</sub>H<sub>25</sub>O<sub>4</sub>]<sup>+</sup> 305.1747, found 305.1758.

### Compound 15b

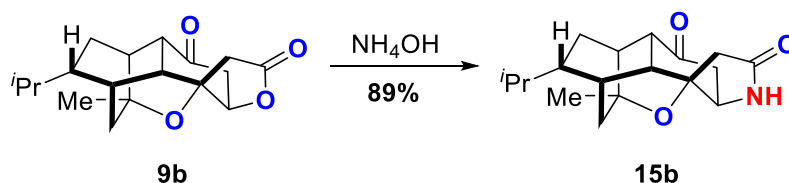

To a compound **9b** (1.02 g, 3.35 mmol, 1.0 equiv.) under argon atmosphere, was added NH<sub>4</sub>OH (5 mL). After being stirred for overnight at the same temperature, the reaction mixture was concentrated under reduced pressure. The residue was purified by flash chromatography on silica gel (eluent: MeOH/DCM, 1/20) to give the corresponding amide **15b** (909 mg, yield:

89%) as a white powder.

**Rf** = 0.4 (silica, MeOH/DCM = 1:10);

**[ $\alpha$ ]<sub>D</sub><sup>25</sup>** = -19.8 (*c* 0.9, DCM);

**<sup>1</sup>H NMR** (400 MHz, CDCl<sub>3</sub>):  $\delta$  = 6.15 (s, 1H), 3.77 (dd, *J* = 8.9, 7.7 Hz, 1H), 2.80 (dd, *J* = 12.3, 7.7 Hz, 1H), 2.74 (d, *J* = 16.9 Hz, 1H), 2.64 – 2.54 (m, 2H), 2.43 (dd, *J* = 12.3, 8.9 Hz, 1H), 2.33 (d, *J* = 4.6 Hz, 1H), 2.20 (dd, *J* = 9.5, 5.9 Hz, 2H), 1.80 (ddd, *J* = 12.9, 7.8, 4.7 Hz, 1H), 1.55 – 1.30 (m, 4H), 1.08 (s, 4H), 0.90 (dd, *J* = 6.4, 4.6 Hz, 6H) ppm;

**<sup>13</sup>C NMR** (101 MHz, CDCl<sub>3</sub>):  $\delta$  = 210.2, 174.6, 79.3, 75.7, 59.9, 45.9, 42.7, 42.5, 41.7, 41.5, 35.9, 31.5, 29.6, 29.5, 27.3, 23.6, 21.6, 20.3 ppm;

**HRMS (ESI, TOF)**: calculated for [C<sub>18</sub>H<sub>26</sub>NO<sub>3</sub>]<sup>+</sup> 304.1907, found 304.1914.

### Compounds **16a** and **16b**

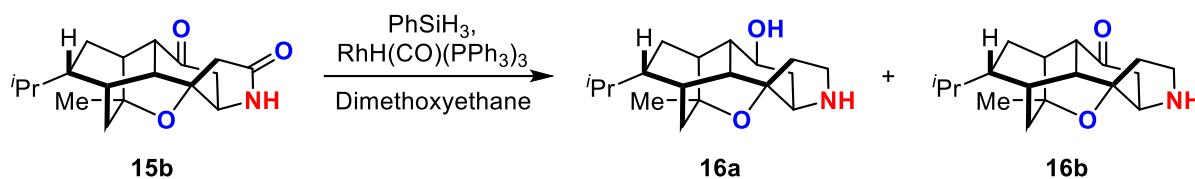

To a cooled (0 °C) solution of compound **15b** (20 mg, 0.07 mmol, 1.0 equiv.) in dimethoxyethane (1.5 mL) under argon atmosphere, was added RhH(CO)(PPh<sub>3</sub>)<sub>3</sub> (6.4 mg, 0.007 mmol, 0.1 equiv.). Then, PhSiH<sub>3</sub> (39  $\mu$ L, 0.35 mmol, 5.0 equiv.) was added dropwise. After being stirred 1.5 h at room temperature, the reaction mixture was quenched with saturated aqueous NaHCO<sub>3</sub> (2 mL), and the organic layer was separated. The aqueous phase was extracted with ethyl acetate (3  $\times$  3 mL). The combined organic phases were washed with brine, dried over anhydrous Na<sub>2</sub>SO<sub>4</sub>, filtered, and concentrated under reduced pressure. The resulting crude amine **16a** and **16b** were used directly for the next step without further purification.



## Sarglamide E (5)

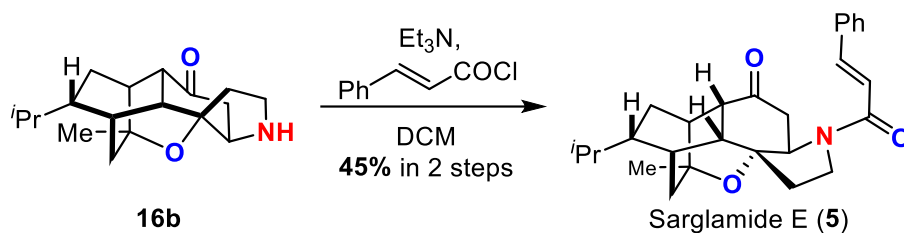

To a cooled ( $0\text{ }^\circ\text{C}$ ) solution of amine **16b** obtained above in  $\text{DCM}$  (1 mL) under argon atmosphere, was added  $\text{Et}_3\text{N}$  ( $5.5\ \mu\text{L}$ , 0.039 mmol, 1.1 equiv.) and cinnamoyl chloride (7.2 mg, 0.04 mmol, 1.1 equiv.). After being stirred for 1 h at the same temperature, the reaction mixture was quenched with saturated aqueous  $\text{NaHCO}_3$ , and the organic layer was separated. The aqueous phase was extracted with  $\text{DCM}$  ( $3 \times 3\ \text{mL}$ ). The combined organic phases were washed with brine, dried over anhydrous  $\text{Na}_2\text{SO}_4$ , filtered, and concentrated under reduced pressure. The residue was purified by flash chromatography on silica gel (eluent:  $\text{EtOAc}/n\text{-Hexane}$ , 1/2) to give the corresponding sarglamide E (**5**) (13.1 mg, yield: 45% in 2 steps) as a white powder.

$\text{Rf} = 0.4$  (silica,  $\text{EtOAc}/n\text{-Hexane} = 1:1$ );

$[\alpha]_{\text{D}}^{25} = -26.4$  ( $c\ 0.5$ ,  $\text{MeOH}$ ); lit.<sup>[3]</sup>  $[\alpha]_{\text{D}}^{22} = -175$  ( $c\ 0.3$ ,  $\text{MeOH}$ )

$^1\text{H NMR}$  (400 MHz,  $\text{CDCl}_3$ ):  $\delta = 7.69$  (d,  $J = 15.3\ \text{Hz}$ , 1H), 7.67 (d,  $J = 15.3\ \text{Hz}$ , 1H), 7.51 (m, 2H), 7.37 (m, 3H), 6.68 (d,  $J = 15.3\ \text{Hz}$ , 1H), 6.54 (d,  $J = 15.3\ \text{Hz}$ , 1H), 4.16 (m, 1H), 4.00 (m, 1H), 3.94 (m, 1H), 3.92 (m, 1H), 3.73 (m, 1H), 3.49 (m, 1H), 3.05 (m, 1H), 2.60 (m, 1H), 2.59 (m, 1H), 2.55 (m, 1H), 2.40 (m, 1H), 2.39-2.38 (m, 1H), 2.37 (m, 3H), 2.23 (m, 1H), 2.22 (m, 1H), 2.19 (m, 1H), 2.08 (m, 1H), 1.98 (m, 1H), 1.81 (ddd,  $J = 12.8, 8.1, 4.7\ \text{Hz}$ , 1H), 1.58-1.57 (m, 1H), 1.49 (m, 1H), 1.48-1.47 (m, 1H), 1.39 (m, 1H), 1.10-1.09 (s, 3H), 1.09 (m, 1H), 0.93 (d,  $J = 6.4\ \text{Hz}$ , 3H), 0.91 (d,  $J = 6.4\ \text{Hz}$ , 3H) ppm;

$^{13}\text{C NMR}$  (101 MHz,  $\text{CDCl}_3$ ):  $\delta = 212.1, 211.2, 165.7, 142.8, 135.2, 130.0, 129.0, 128.1, 118.2, 83.4, 81.8, 75.7, 63.2, 62.9, 46.1, 45.7, 43.8, 41.9, 41.8, 35.2, 35.0, 34.4, 31.7, 29.9, 29.9, 29.8, 29.8, 28.1, 24.0, 21.8, 20.5$  ppm;

$\text{HRMS (ESI, TOF)}$ : calculated for  $[\text{C}_{27}\text{H}_{34}\text{NO}_3]^+$  420.2533, found 420.2539.

### 1.2.3 Preparation of Sarglamide F (17)

#### Compound 9a

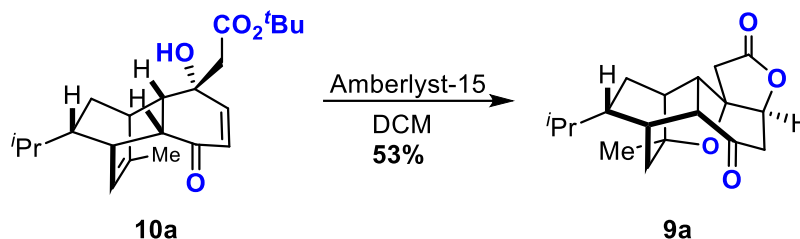

To a solution of compound **10a** (1.3 g, 3.2 mmol, 1.0 equiv.) in DCM (30 mL) under argon atmosphere, was added amberlyst-15 (1.0 g, 3.2 mmol, 1.0 equiv.). After being stirred for 4 h at the reflux temperature, the reaction mixture was filtered with celite and concentrated under reduced pressure. The residue was purified by flash chromatography on silica gel (eluent: EtOAc/*n*-Hexane, 1/4) to give the corresponding pentacyclic **9a** (515 mg, yield: 53%) as a white powder.

**R<sub>f</sub>** = 0.3 (silica, EtOAc/*n*-Hexane = 1:4);

**[α]<sub>D</sub><sup>25</sup>** = -28.9 (*c* 1.0, DCM);

**<sup>1</sup>H NMR** (400 MHz, CDCl<sub>3</sub>): δ = 4.62 (dd, *J* = 9.3, 7.3 Hz, 1H), 2.95 (dd, *J* = 12.6, 7.3 Hz, 1H), 2.87 – 2.76 (m, 2H), 2.68 – 2.59 (m, 2H), 2.39 – 2.33 (m, 2H), 2.04 – 1.94 (m, 2H), 1.44 – 1.34 (m, 2H), 1.31 – 1.23 (m, 1H), 1.21 (s, 3H), 1.15 (ddd, *J* = 15.8, 7.2, 2.7 Hz, 1H), 1.02 – 0.93 (m, 1H), 0.86 (dd, *J* = 6.6, 5.4 Hz, 6H) ppm;

**<sup>13</sup>C NMR** (101 MHz, CDCl<sub>3</sub>): δ = 207.6, 173.2, 82.2, 81.5, 81.0, 51.4, 45.6, 43.9, 42.8, 42.8, 42.7, 34.3, 32.3, 26.3, 24.6, 24.0, 20.8, 20.7 ppm;

**HRMS (ESI, TOF)**: calculated for [C<sub>18</sub>H<sub>24</sub>O<sub>4</sub>+Na]<sup>+</sup> 327.1567, found 327.1578.

## Compound 15a

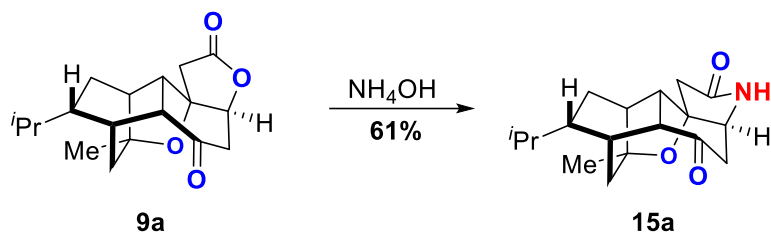

To a compound **9a** (150 mg, 0.5 mmol, 1.0 equiv.) under argon atmosphere, was added  $\text{NH}_4\text{OH}$  (2 mL) in the sealed tube. After being stirred for overnight at the 70 °C, the reaction mixture was concentrated under reduced pressure. The residue was purified by flash chromatography on silica gel (eluent: MeOH/DCM, 1/20) to give the corresponding amide **15a** (95 mg, yield: 61%) as a white powder.

$R_f = 0.4$  (silica, MeOH/DCM = 1:10);

$[\alpha]_D^{25} = +11.1$  ( $c$  0.5, DCM);

$^1\text{H NMR}$  (400 MHz,  $\text{CDCl}_3$ ):  $\delta = 6.48$  (s, 1H), 3.94 (dd,  $J = 10.5, 6.5$  Hz, 1H), 2.84 (dd,  $J = 9.9, 3.3$  Hz, 1H), 2.74 (dd,  $J = 11.8, 6.5$  Hz, 1H), 2.65 (d,  $J = 17.7$  Hz, 1H), 2.53 – 2.41 (m, 2H), 2.40 – 2.28 (m, 2H), 2.05 – 1.85 (m, 2H), 1.49 – 1.37 (m, 2H), 1.37 – 1.24 (m, 1H), 1.23 (s, 3H), 1.21 – 1.12 (m, 1H), 1.05 – 0.94 (m, 1H), 0.95 – 0.83 (m, 6H) ppm;

$^{13}\text{C NMR}$  (101 MHz,  $\text{CDCl}_3$ ):  $\delta = 209.0, 174.3, 81.8, 81.8, 59.4, 51.9, 46.9, 45.5, 44.1, 44.0, 42.6, 34.6, 32.4, 26.3, 24.8, 24.1, 20.8, 20.8$  ppm;

**HRMS (ESI, TOF)**: calculated for  $[\text{C}_{18}\text{H}_{26}\text{NO}_3]^+$  304.1907, found 304.1913.

## Compound 16c

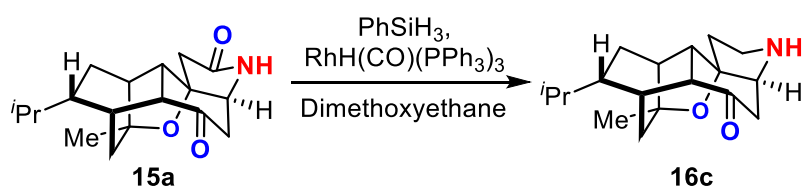

To a cooled (0 °C) solution of compound **15a** (15 mg, 0.05 mmol, 1.0 equiv.) in

dimethoxyethane (1.5 mL) under argon atmosphere, was added RhH(CO)(PPh<sub>3</sub>)<sub>3</sub> (4.5 mg, 0.005 mmol, 0.1 equiv.). Then, PhSiH<sub>3</sub> (28 μL, 0.25 mmol, 5.0 equiv.) was added dropwise. After being stirred 1.5 h at room temperature, the reaction mixture was quenched with saturated aqueous NaHCO<sub>3</sub> (2 mL), and the organic layer was separated. The aqueous phase was extracted with ethyl acetate (3 × 3 mL). The combined organic phases were washed with brine, dried over anhydrous Na<sub>2</sub>SO<sub>4</sub>, filtered, and concentrated under reduced pressure. The resulting crude amine **16c** was used directly for the next step without further purification.

### Sarglamide F (**17**)

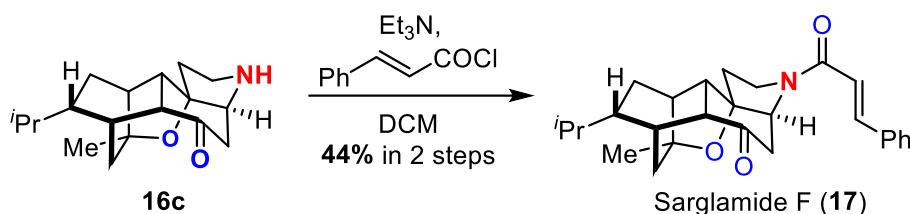

To a cooled (0 °C) solution of crude amine **16c** obtained above in DCM (1 mL) under argon atmosphere, was added Et<sub>3</sub>N (4.3 μL, 0.03 mmol, 1.1 equiv.) and cinnamoyl chloride (5.1 mg, 0.03 mmol, 1.1 equiv.). After being stirred for 1 h at the same temperature, the reaction mixture was quenched with saturated aqueous NaHCO<sub>3</sub>, and the organic layer was separated. The aqueous phase was extracted with DCM (3 × 5 mL). The combined organic phases were washed with brine, dried over anhydrous Na<sub>2</sub>SO<sub>4</sub>, filtered, and concentrated under reduced pressure. The residue was purified by flash chromatography on silica gel (eluent: EtOAc/*n*-Hexane, 1/2) to give the corresponding sarglamide F (**17**) (9.8 mg, yield: 44% in 2 steps) as a white powder.

**Rf** = 0.35 (silica, EtOAc/*n*-Hexane = 1:1);

**[α]<sub>D</sub><sup>25</sup>** = -128.2 (*c* 1.0, DCM);

**<sup>1</sup>H NMR** (400 MHz, CDCl<sub>3</sub>, Rotamer): δ = 7.71 (m, 1H), 7.51 (m, 2H), 7.36 (m, 3H), 6.60 (d, *J* = 15.2 Hz, 1H), 4.24 (m, 1H), 3.65 (m, 1H), 3.32 (m, 1H), 2.82 (m, 2H), 2.40 (m, 3H), 2.06 (m, 4H), 1.47 (m, 2H), 1.18-1.30 (m, 3H), 1.23 (m, 3H), 1.01 (m, 1H), 0.89 (m, 6H) ppm;

**<sup>13</sup>C NMR** (101 MHz, CDCl<sub>3</sub>, Rotamer): δ = 210.8, 210.0, 164.8, 143.2, 142.4, 134.9, 129.8, 128.8, 127.9, 118.1, 117.1, 87.8, 85.5, 81.4, 62.0, 51.4, 45.5, 45.3, 44.6, 44.3, 44.0, 43.1, 42.2,

38.7, 34.6, 32.5, 29.7, 27.5, 26.6, 24.7, 24.1, 20.8, 20.8 ppm;

**HRMS (ESI, TOF):** calculated for  $[C_{27}H_{34}NO_3]^+$  420.2533, found 420.2535.

### 1.2.4 Preparation of Sarglamide A (1)

#### Compound 21a

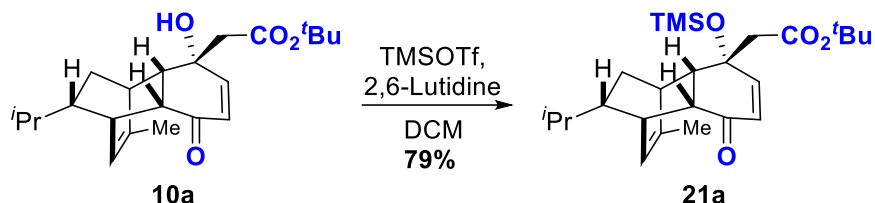

To a cooled (0 °C) solution of compound **10a** (1.08 g, 3.0 mmol, 1.0 equiv.) in DCM (30 mL) under argon atmosphere, was added 2,6-lutidine (0.38 mL, 3.3 mmol, 1.1 equiv.). After being stirred for another 5 min at the same temperature, TMSOTf (0.60 mL, 3.3 mmol, 1.1 equiv.) dropwise. After being stirred for 1 h at 0 °C, the reaction mixture was quenched with saturated aqueous NaHCO<sub>3</sub>, and the organic layer was separated. The aqueous phase was extracted with DCM (3 × 15 mL). The combined organic phases were washed with brine, dried over anhydrous Na<sub>2</sub>SO<sub>4</sub>, filtered, and concentrated under reduced pressure. The residue was purified by flash chromatography on silica gel (eluent: EtOAc/*n*-Hexane, 1/20) to give the corresponding silyl protected acetate **21a** (1.03 g, yield: 79%) as a colorless oil.

**R<sub>f</sub>** = 0.21 (silica, EtOAc/*n*-Hexane = 1:20);

**[α]<sub>D</sub><sup>25</sup>** = +39.5 (*c* 0.2, DCM);

**<sup>1</sup>H NMR** (400 MHz, CDCl<sub>3</sub>): δ = 6.73 (dd, *J* = 10.3, 1.7 Hz, 1H), 5.72 (d, *J* = 10.3 Hz, 1H), 5.45 (d, *J* = 6.2 Hz, 1H), 3.03 (m, 1H), 2.71 (m, 1H), 2.64 (dd, *J* = 8.4, 3.7 Hz, 1H), 2.58 (d, *J* = 14.6 Hz, 1H), 2.49 (d, *J* = 8.4 Hz, 1H), 2.45 (d, *J* = 14.6 Hz, 1H), 1.71 (m, 1H), 1.70 (d, *J* = 1.6 Hz, 3H), 1.43 (m, 1H), 1.42 (s, 9H), 1.11 (m, 1H), 0.87 (d, *J* = 6.6 Hz, 3H), 0.82 (m, 1H), 0.77 (d, *J* = 6.6 Hz, 3H), 0.22 (s, 9H) ppm;

**<sup>13</sup>C NMR** (101 MHz, CDCl<sub>3</sub>): δ = 200.8, 168.3, 151.0, 144.4, 129.5, 121.9, 81.1, 74.0, 51.7, 50.9, 44.6, 43.8, 39.7, 36.4, 34.9, 33.2, 28.1, 21.2, 20.6, 20.2, 2.4 ppm;

HRMS (ESI, TOF): calculated for  $[C_{25}H_{40}O_4Si+Na]^+$  455.2588, found 455.2595.

### Compound 18a

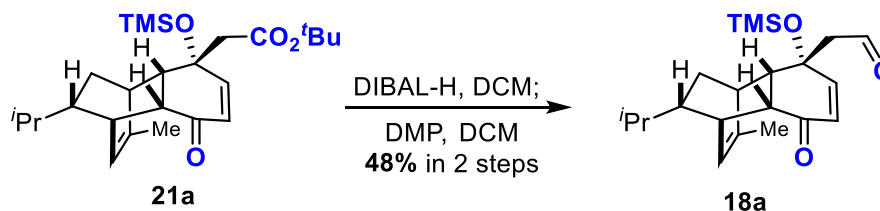

To a cooled (-78 °C) solution of silyl protected acetate **21a** (898 mg, 2.08 mmol, 1.0 equiv.) in DCM (20 mL), was added to DIBAL-H (8.3 mL, 8.32 mmol, 4.0 equiv., 1.0 M in hexane) dropwise. After being stirred for 1 h at the same temperature, the resulting mixture was quenched with saturated aqueous Rochelle salt carefully. The resulting mixture was allowed to stir at room temperature for another 3 h before the organic layer was separated. The aqueous phase was extracted with DCM (3 × 10 mL). The combined organic phases were washed with brine, dried over anhydrous Na<sub>2</sub>SO<sub>4</sub>, filtered, and concentrated under reduced pressure. The resulting crude diol was used directly for the next step without further purification.

To a cooled (0 °C) suspension of the above-mentioned diol and NaHCO<sub>3</sub> (1.7 g, 20.8 mmol, 10.0 equiv.) in DCM (24 mL) under argon atmosphere, was added DMP (2.5 g, 6.24 mmol, 3.0 equiv.) in 3 portions. After being stirred for 2 h at the same temperature, the reaction mixture was quenched with saturated NaHCO<sub>3</sub> and Na<sub>2</sub>S<sub>2</sub>O<sub>3</sub> were added sequentially. After being stirred for 2 h at room temperature, the organic layer was separated, and the aqueous phases was extracted with DCM (3 × 10 mL). The combined organic phases were washed with brine, dried over anhydrous Na<sub>2</sub>SO<sub>4</sub>, filtered, and concentrated under reduced pressure. The residue was purified by flash chromatography on silica gel (eluent: EtOAc/*n*-Hexane, 1/20 to 1/16) to give compound **18a** (360 mg, yield: 48%, over 2 steps) as a colorless oil.

**R<sub>f</sub>** = 0.65 (silica, EtOAc/*n*-Hexane = 1:4);

**[α]<sub>D</sub><sup>25</sup>** = +28.8 (*c* 0.5, DCM);

**<sup>1</sup>H NMR** (400 MHz, CDCl<sub>3</sub>): δ = 9.67 (t, *J* = 2.4 Hz, 1H), 6.63 (dd, *J* = 10.3, 1.8 Hz, 1H), 5.66 (d, *J* = 10.3 Hz, 1H), 5.37 (d, *J* = 6.2 Hz, 1H), 2.98 (m, 1H), 2.66 (m, 1H), 2.62 (dd, *J* = 15.7,

2.24 Hz, 1H), 2.54, (dd,  $J = 8.3, 3.8$  Hz, 1H), 2.48 (dd,  $J = 15.7, 3.04$  Hz, 1H), 2.23 (d,  $J = 8.28$  Hz, 1H), 1.63 (d,  $J = 1.6$  Hz, 3H), 1.28 (m, 1H), 1.03 (m, 1H), 0.87 (m, 1H) 0.78 (d,  $J = 6.6$  Hz, 3H), 0.75 (m, 1H), 0.69 (d,  $J = 6.6$  Hz, 3H), 0.15 (s, 9H) ppm;

$^{13}\text{C}$  NMR (101 MHz,  $\text{CDCl}_3$ ):  $\delta = 199.8, 199.7, 149.6, 144.2, 130.0, 122.0, 74.2, 58.6, 50.4, 45.5, 43.4, 39.8, 36.1, 34.6, 33.0, 21.0, 20.4, 20.0, 2.3$  ppm;

**HRMS (ESI, TOF):** calculated for  $[\text{C}_{21}\text{H}_{32}\text{O}_3\text{Si}+\text{Na}]^+$  383.2013, found 383.2018.

### Compound 19a

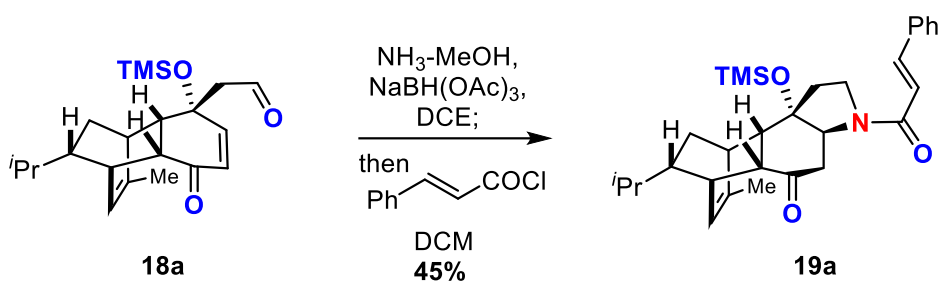

To a solution of compound **18a** (72 mg, 0.2 mmol, 1.0 equiv.) in DCE (2 mL) under argon atmosphere, was added a  $\text{NH}_3$  (57  $\mu\text{L}$ , 0.4 mmol, 2.0 equiv., 7M in MeOH). Once the starting material disappeared based on TLC, the resulting mixture was evacuated under reduced pressure.

To a cooled (0  $^\circ\text{C}$ ) suspension of the abovementioned imine in MeOH (2 mL) under argon atmosphere, was added  $\text{NaBH}(\text{OAc})_3$  (127 mg, 0.6 mmol, 3.0 equiv.) in one portion. After being stirred for overnight at 0  $^\circ\text{C}$ , the reaction mixture was quenched with saturated aqueous  $\text{NaHCO}_3$ . The organic layer was separated, and the aqueous phase was extracted with EtOAc (3  $\times$  2 mL). The combined organic phases were washed with brine, dried over anhydrous  $\text{Na}_2\text{SO}_4$  and  $\text{MgSO}_4$ , filtered, and concentrated under reduced pressure. The resulting amine was used directly for the next step without further purification.

To a cooled (0  $^\circ\text{C}$ ) suspension of the abovementioned amine in DCM (2 mL) under argon atmosphere, was added added triethylamine (31  $\mu\text{L}$ , 0.22 mmol, 1.1 equiv.) and cinnamoyl chloride (33 mg, 0.2 mmol, 1.0 equiv.). After being stirred for 2 h at the same temperature, the reaction mixture was quenched with saturated aqueous  $\text{NaHCO}_3$ . The organic layer was

separated, and the aqueous phase was extracted with DCM (3 × 2 mL). The combined organic phases were washed with brine, dried over anhydrous Na<sub>2</sub>SO<sub>4</sub>, filtered, and concentrated under reduced pressure. The residue was purified by flash chromatography on silica gel (eluent: EtOAc/*n*-Hexane, 1/4 to 1/3) to give compound **19a** (44 mg, yield: 45%) as a colorless oil.

R<sub>f</sub> = 0.43 (silica, EtOAc/*n*-Hexane = 2:1);

[α]<sub>D</sub><sup>25</sup> = +20.8 (*c* 0.4, DCM);

<sup>1</sup>H NMR (400 MHz, CDCl<sub>3</sub>, Rotamer): δ = 7.68 (d, *J* = 15.4 Hz, 1H), 7.51 (m, 2H), 7.40 (m, 3H), 6.63 (d, *J* = 15.4 Hz, 1H), 5.75 (d, *J* = 6.3 Hz, 1H), 4.30 (d, *J* = 10.4 Hz, 1H), 3.66 (m, 1H), 3.66 (m, 1H), 3.11 (dd, *J* = 17.6, 10.9 Hz, 1H), 2.85 (m, 1H), 2.70 (td, *J* = 6.3, 2.24 Hz, 1H), 2.58 (m, 1H), 2.38 (td, *J* = 10.1, 1.52 Hz, 1H), 2.16 (td, *J* = 17.6, 1.9 Hz, 1H), 1.96 (d, *J* = 1.4 Hz, 3H), 1.94 (m, 1H), 1.80 (m, 1H), 1.69 (m, 1H), 1.34 (m, 1H), 1.05 (m, 1H), 0.95 (m, 1H), 0.84 (d, *J* = 6.5 Hz, 3H), 0.78 (d, *J* = 6.5 Hz, 3H), 0.18 (s, 9H) ppm;

<sup>13</sup>C NMR (101 MHz, CDCl<sub>3</sub>, Rotamer): δ = 214.9, 212.8, 164.3, 142.8, 142.7, 142.6, 142.4, 135.2, 135.1, 129.7, 128.8, 128.8, 127.9, 127.8, 123.8, 123.3, 118.1, 117.9, 82.5, 81.0, 62.5, 62.3, 53.7, 53.4, 47.6, 46.8, 46.6, 46.1, 45.8, 43.3, 42.5, 39.2, 39.1, 37.2, 35.0, 33.4, 33.4, 33.2, 33.1, 21.2, 20.6, 20.5, 20.3, 20.3, 2.2, 2.2 ppm;

HRMS (ESI, TOF): calculated for [C<sub>30</sub>H<sub>42</sub>NO<sub>3</sub>Si]<sup>+</sup> 492.2928, found 492.2935.

### Sarglamide A (1)

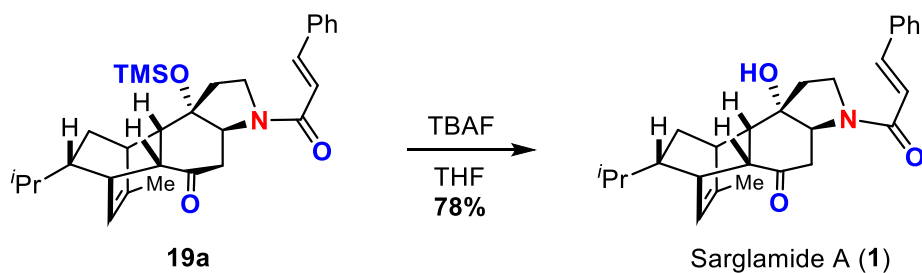

To a cooled (0 °C) suspension of compound **19a** (44 mg, 0.9 mmol, 1.0 equiv.) in THF (1 mL) under argon atmosphere, was added TBAF (0.1 mL, 0.1 mmol, 1.1 equiv., 1.0 M in THF), dropwise. The resulting mixture was stirred for 1 h at the same temperature. The reaction was quenched with saturated aqueous NH<sub>4</sub>Cl, and then the organic layer was separated. The



aqueous phase was extracted with EtOAc (3 × 1 mL). The combined organic phases were washed with brine, dried over anhydrous Na<sub>2</sub>SO<sub>4</sub>, filtered, and concentrated under reduced pressure. The residue was purified by flash chromatography on silica gel (eluent: EtOAc/*n*-Hexane, 1/4 to 1/2) to give compound Sarglamide A (**1**) (32 mg, yield: 78%) as a colorless crystal.

**Rf** = 0.35 (silica, EtOAc/*n*-Hexane = 1:1);

$[\alpha]_D^{25} = +25.1$  (*c* 0.4, MeOH); lit.<sup>[3]</sup>  $[\alpha]_D^{22} = +17$  (*c* 0.3, MeOH)

<sup>1</sup>H NMR (400 MHz, CDCl<sub>3</sub>): δ = 7.60 (d, *J* = 15.6 Hz, 1H), 7.42 (m, 2H), 7.35, (m, 1H), 7.34 (m, 2H), 6.42 (d, *J* = 15.6 Hz, 1H), 5.80 (d, *J* = 6.2 Hz, 1H), 4.37 (d, *J* = 10.6 Hz, 1H), 3.55 (m, 1H), 3.47 (m, 1H), 3.21 (m, 1H), 3.04 (dd, *J* = 17.9, 10.8 Hz, 1H), 2.73 (m, 1H), 2.60 (m, 1H), 2.42 (dd, *J* = 10.4, 1.5 Hz, 1H), 2.15 (d, *J* = 1.3 Hz, 3H), 2.11 (m, 1H), 1.87 (m, 1H), 1.78 (m, 1H), 1.37 (m, 1H), 1.09 (m, 1H), 1.02 (m, 1H), 0.86 (d, *J* = 6.5 Hz, 3H), 0.79 (d, *J* = 6.5 Hz, 3H) ppm;

<sup>13</sup>C NMR (101 MHz, CDCl<sub>3</sub>): 215.0, 164.6, 143.2, 142.5, 134.9, 130.1, 129.0, 128.0, 123.3, 117.6, 76.5, 60.4, 53.7, 46.5, 46.4, 46.4, 43.7, 39.1, 37.8, 36.7, 33.5, 33.2, 21.2, 20.7, 20.4 ppm;

**HRMS (ESI, TOF)**: calculated for [C<sub>27</sub>H<sub>33</sub>NO<sub>3</sub>+Na]<sup>+</sup> 442.2353, found 442.2354.

### Sarglamide F (**17**)

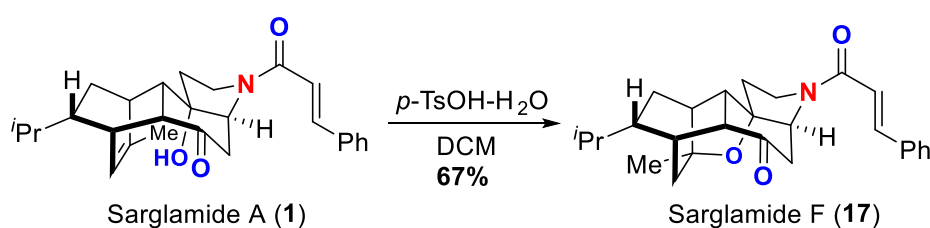

To a solution of Sarglamide A (**1**) (15 mg, 0.036 mmol, 1.0 equiv.) in DCM (0.5 mL) under argon atmosphere, was added *p*-TsOH·H<sub>2</sub>O (0.68 mg, 0.0036 mmol, 0.1 equiv.) at room temperature. After being stirred for 6 h at 50 °C, the reaction mixture was quenched by NaHCO<sub>3</sub>. The organic phase was separated, and the aqueous phase was extracted with DCM (3 × 1 mL). The combined organic phases were washed with brine, dried over anhydrous Na<sub>2</sub>SO<sub>4</sub>, filtered, and concentrated under reduced pressure. The residue was purified by PTLC (EtOAc/*n*-Hexane,

2/1) to give Sarglamide F (**17**) (10 mg, yield: 67%) as white solid.

### 1.2.5 Preparation of Sarglamide C (**3**)

#### Compound 21b

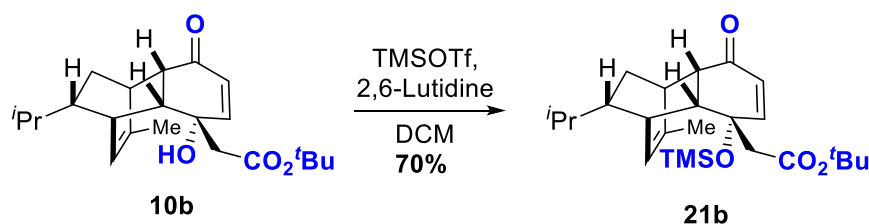

To a cooled (0 °C) solution of compound **10b** (4.1 g, 11.4 mmol, 1.0 equiv.) in DCM (110 mL) under argon atmosphere, was added 2,6-Lutidine (1.46 mL, 12.5 mmol, 1.1 equiv.). After being stirred for another 5 min at the same temperature, TMSOTf (2.27 mL, 12.5 mmol, 1.1 equiv.) dropwise. After being stirred for 1 h at 0 °C, the reaction mixture was quenched with saturated aqueous NaHCO<sub>3</sub>, and the organic layer was separated. The aqueous phase was extracted with DCM (3 × 15 mL). The combined organic phases were washed with brine, dried over anhydrous Na<sub>2</sub>SO<sub>4</sub>, filtered, and concentrated under reduced pressure. The residue was purified by flash chromatography on silica gel (eluent: EtOAc/*n*-Hexane, 1/20) to give the corresponding silyl protected acetate **21b** (3.4 g, 70%) as a colorless oil.

**R<sub>f</sub>** = 0.21 (silica, EtOAc/*n*-Hexane = 1:20);

[ $\alpha$ ]<sub>D</sub><sup>25</sup> = +25.6 (*c* 1.0, DCM);

**<sup>1</sup>H NMR** (400 MHz, CDCl<sub>3</sub>):  $\delta$  = 6.79 (dd, *J* = 10.3, 1.3 Hz, 1H), 5.84 (d, *J* = 10.3 Hz, 1H), 5.66 (dt, *J* = 6.5, 1.8 Hz, 1H), 2.96 (dt, *J* = 6.6, 1.9 Hz, 1H), 2.84 (dt, *J* = 3.5, 1.6 Hz, 1H), 2.72 (dd, *J* = 9.0, 3.4 Hz, 1H), 2.59 (d, *J* = 14.3 Hz, 1H), 2.52 – 2.48 (m, 1H), 2.46 (d, *J* = 14.3 Hz, 1H), 1.78 (ddd, *J* = 13.1, 9.1, 2.4 Hz, 1H), 1.59 (d, *J* = 1.7 Hz, 3H), 1.42 (s, 9H), 1.22 (tt, *J* = 9.3, 3.2 Hz, 1H), 1.11 – 0.97 (m, 2H), 0.88 (d, *J* = 6.5 Hz, 3H), 0.77 (d, *J* = 6.4 Hz, 3H), 0.18 (s, 9H) ppm;

**<sup>13</sup>C NMR** (101 MHz, CDCl<sub>3</sub>):  $\delta$  = 199.8, 168.6, 152.5, 139.3, 129.1, 124.9, 81.0, 73.3, 52.0, 49.8, 48.6, 47.7, 42.1, 34.2, 32.9, 30.6, 28.1, 21.2, 20.8, 20.4, 2.3 ppm;

HRMS (ESI, TOF): calculated for  $[C_{25}H_{40}O_4Si+Na]^+$  455.2588, found 455.2594.

### Compound 18b

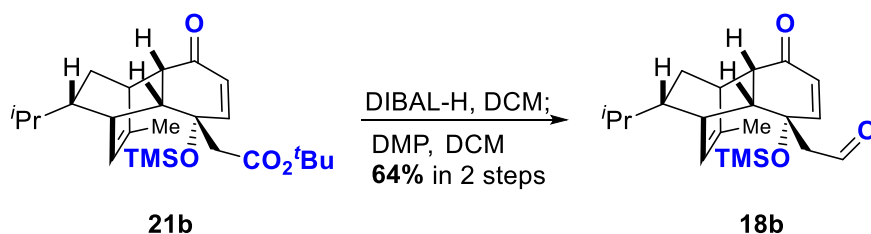

To a cooled ( $-78\text{ }^{\circ}\text{C}$ ) solution of silyl protected acetate **21b** (3.4 g, 8.0 mmol, 1.0 equiv.) in DCM (80 mL), was added to DIBAL-H (32 mL, 32 mmol, 4.0 equiv., 1.0 M in hexane) dropwise. After being stirred for 1 h at the same temperature, the resulting mixture was quenched with saturated aqueous Rochelle salt carefully. The resulting mixture was allowed to stir at room temperature for another 3 h before the organic layer was separated. The aqueous phase was extracted with DCM ( $3 \times 50\text{ mL}$ ). The combined organic phases were washed with brine, dried over anhydrous  $\text{Na}_2\text{SO}_4$ , filtered, and concentrated under reduced pressure. The resulting crude diol was used directly for the next step without further purification.

To a cooled ( $0\text{ }^{\circ}\text{C}$ ) suspension of the above-mentioned diol and  $\text{NaHCO}_3$  (6.72 g, 80 mmol, 10.0 equiv.) in DCM (80 mL) under argon atmosphere, was added DMP (10.2 g, 24 mmol, 3.0 equiv.) in 3 portions. After being stirred for 2 h at the same temperature, the reaction mixture was quenched with saturated  $\text{NaHCO}_3$  and  $\text{Na}_2\text{S}_2\text{O}_3$  were added sequentially. After being stirred for 2 h at room temperature, the organic layer was separated, and the aqueous phases was extracted with DCM ( $3 \times 100\text{ mL}$ ). The combined organic phases were washed with brine, dried over anhydrous  $\text{Na}_2\text{SO}_4$ , filtered, and concentrated under reduced pressure. The residue was purified by flash chromatography on silica gel (eluent: EtOAc/*n*-Hexane, 1/20 to 1/16) to give compound **18b** (1.8 mg, yield: 64%, over 2 steps) as a colorless oil.

$R_f = 0.65$  (silica, EtOAc/*n*-Hexane = 1:4);

$[\alpha]_D^{25} = +116.2$  ( $c$  1.0, DCM);

$^1\text{H NMR}$  (400 MHz,  $\text{CDCl}_3$ ):  $\delta = 9.76$  (t,  $J = 2.3\text{ Hz}$ , 1H), 6.75 (dd,  $J = 10.3, 1.5\text{ Hz}$ , 1H), 5.85 (d, 10.3 Hz, 1H), 5.67 (d,  $J = 6.4\text{ Hz}$ , 1H), 2.99 (m, 1H), 2.84 (m, 1H), 2.74 (dd,  $J = 8.7, 3.6$

Hz, 1H), 2.68 (dd,  $J = 15.2, 2.2$  Hz, 1H), 2.54 (dd,  $J = 15.2, 2.2$  Hz, 1H), 2.27 (d,  $J = 8.7$  Hz, 1H), 1.78 (m, 1H), 1.58 (d,  $J = 1.6$  Hz, 3H), 1.21 (m, 1H), 1.04 (m, 1H), 1.00 (m, 1H), 0.87 (d,  $J = 6.4$  Hz, 3H), 0.77 (d,  $J = 6.4$  Hz, 3H), 0.21 (s, 9H) ppm;

$^{13}\text{C}$  NMR (101 MHz,  $\text{CDCl}_3$ ):  $\delta = 200.3, 199.2, 151.2, 139.9, 129.7, 124.6, 74.0, 59.3, 49.3, 48.8, 48.8, 42.8, 33.9, 32.7, 30.2, 21.1, 20.8, 20.3, 2.3$  ppm;

HRMS (ESI, TOF): calculated for  $[\text{C}_{21}\text{H}_{32}\text{O}_3\text{Si}+\text{Na}]^+$  383.2013, found 383.2021.

### Compound 19b

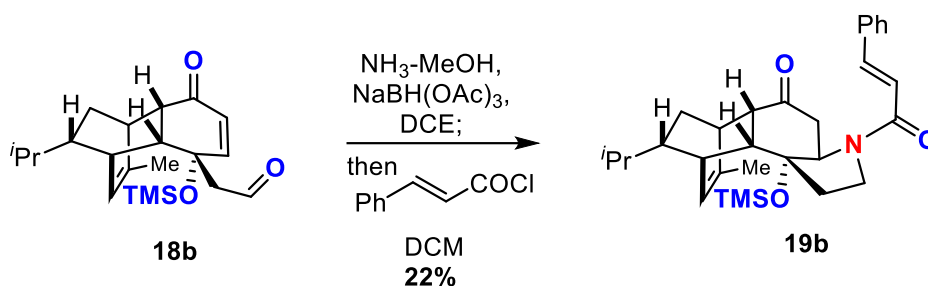

To a solution of compound **18b** (150 mg, 0.45 mmol, 1.0 equiv.) in DCE (4.5 mL) under argon atmosphere, was added a  $\text{NH}_3$  (129  $\mu\text{L}$ , 0.45 mmol, 2.0 equiv., 7M in MeOH). Once the starting material disappeared based on TLC, the resulting mixture was evacuated under reduced pressure.

To a cooled (0  $^\circ\text{C}$ ) suspension of the abovementioned imine in MeOH (4.5 mL) under argon atmosphere, was added  $\text{NaBH(OAc)}_3$  (286 mg, 1.35 mmol, 3.0 equiv.) in one portion. After being stirred for overnight at 0  $^\circ\text{C}$ , the reaction mixture was quenched with saturated aqueous  $\text{NaHCO}_3$ . The organic layer was separated, and the aqueous phase was extracted with EtOAc (3  $\times$  3 mL). The combined organic phases were washed with brine, dried over anhydrous  $\text{Na}_2\text{SO}_4$  and  $\text{MgSO}_4$ , filtered, and concentrated under reduced pressure. The resulting amine was used directly for the next step without further purification.

To a cooled (0  $^\circ\text{C}$ ) suspension of the abovementioned amine in DCM (4.5 mL) under argon atmosphere, was added triethylamine (69  $\mu\text{L}$ , 0.50 mmol, 1.1 equiv.) and cinnamoyl chloride (64  $\mu\text{L}$ , 0.45 mmol, 1.0 equiv.). After being stirred for 2 h at the same temperature, the reaction mixture was quenched with saturated aqueous  $\text{NaHCO}_3$ . The organic layer was separated, and

the aqueous phase was extracted with DCM (3 × 3 mL). The combined organic phases were washed with brine, dried over anhydrous Na<sub>2</sub>SO<sub>4</sub>, filtered, and concentrated under reduced pressure. The residue was purified by flash chromatography on silica gel (eluent: EtOAc/*n*-Hexane, 1/4 to 1/3) to give compound **19b** (50 mg, yield: 22% in 2 steps) as a colorless powder.

**R<sub>f</sub>** = 0.42 (silica, EtOAc/*n*-Hexane = 1:2);

[ $\alpha$ ]<sub>D</sub><sup>25</sup> = +64.9 (*c* 1.0, DCM);

**<sup>1</sup>H NMR** (400 MHz, CDCl<sub>3</sub>, Rotamer):  $\delta$  = 7.69 (d, *J* = 15.4 Hz, 1H), 7.52 (m, 2H), 7.37 (m, 3H), 6.6 (d, *J* = 15.4 Hz, 1H), 5.93 (d, *J* = 6.08 Hz, 1H), 4.41 (d, *J* = 10.4 Hz, 1H), 3.66 (m, 2H), 3.13 (d, *J* = 6.5 Hz, 1H), 2.67 (m, 1H), 2.48 (m, 1H), 2.28 (d, *J* = 9.9 Hz, 1H), 2.19 (m, 1H), 1.95 (m, 2H), 1.81 (m, 1H), 1.77 (m, 1H), 1.77 (d, *J* = 1.5 Hz, 3H), 1.25 (m, 2H), 1.05 (m, 1H), 0.93 (d, *J* = 6.4 Hz, 3H), 0.80 (d, *J* = 6.4 Hz, 3H), 0.18 (s, 9H) ppm;

**<sup>13</sup>C NMR** (101 MHz, CDCl<sub>3</sub>, Rotamer):  $\delta$  = 214.6, 164.3, 142.6, 141.3, 135.1, 129.7, 128.7, 127.9, 127.9, 124.1, 117.9, 82.5, 80.9, 61.5, 60.4, 52.6, 48.3, 47.9, 46.1, 43.2, 42.4, 37.4, 37.2, 33.9, 33.2, 31.4, 21.3, 21.1, 20.5, 14.2, 2.2 ppm;

**HRMS (ESI, TOF)**: calculated for [C<sub>30</sub>H<sub>42</sub>NO<sub>3</sub>Si]<sup>+</sup> 492.2928, found 492.2931.

### Sarglamide C (**3**)

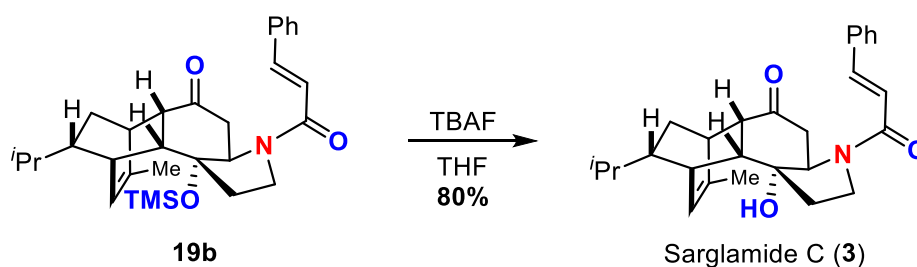

To a cooled (0 °C) suspension of compound **19b** (50 mg, 0.1 mmol, 1.0 equiv.) in THF (1 mL) under argon atmosphere, was added TBAF (0.11 mL, 0.11 mmol, 1.1 equiv., 1.0 M in THF), dropwise. The resulting mixture was stirred for 1 h

at the same temperature. The reaction was quenched with saturated aqueous NH<sub>4</sub>Cl, and then the organic layer was separated. The aqueous phase was extracted with EtOAc (3 × 1 mL). The combined organic phases were washed with brine, dried over anhydrous Na<sub>2</sub>SO<sub>4</sub>, filtered, and

concentrated under reduced pressure. The residue was purified by flash chromatography on silica gel (eluent: EtOAc/*n*-Hexane, 1/4 to 1/2) to give compound Sarglamide C (**3**) (33 mg, yield: 80%) as a colorless crystal.

**Rf** = 0.38 (silica, EtOAc/*n*-Hexane = 1:1);

**[ $\alpha$ ]<sub>D</sub><sup>25</sup>** = -19.3 (*c* 1.0, MeOH); lit.<sup>[3]</sup> **[ $\alpha$ ]<sub>D</sub><sup>22</sup>** = -21 (*c* 0.3, MeOH)

**<sup>1</sup>H NMR** (400 MHz, CDCl<sub>3</sub>):  $\delta$  = 7.63 (d, *J* = 15.5 Hz, 1H), 7.45 (m, 2H), 7.35 (m, 1H), 7.33 (m, 2H), 6.54 (d, *J* = 15.4 Hz, 1H), 6.01 (d, *J* = 6.3 Hz, 1H), 4.43 (d, *J* = 10.2 Hz, 1H), 3.76 (q, *J* = 9.6 Hz, 1H), 3.57 (td, *J* = 8.9, 1.3 Hz, 1H), 3.33 (d, *J* = 6.4 Hz, 1H), 2.93 (dd, *J* = 17.8, 10.6 Hz, 1H), 2.68 (d, 9.9 Hz, 1H), 2.52 (m, 1H), 2.35 (d, *J* = 9.9 Hz, 1H), 2.17 (d, *J* = 17.8 Hz, 1H), 1.92 (m, 1H), 1.82 (d, *J* = 0.96 Hz, 1H), 1.78 (m, 1H), 1.31 (m, 1H), 1.09 (m, 1H), 1.02 (m, 1H), 0.95 (d, *J* = 6.5 Hz, 3H), 0.79 (d, *J* = 6.5 Hz, 3H) ppm;

**<sup>13</sup>C NMR** (101 MHz, CDCl<sub>3</sub>):  $\delta$  = 214.5, 164.9, 142.7, 141.8, 135.1, 130.0, 128.9, 128.1, 124.5, 118.0, 77.0, 61.1, 52.6, 48.1, 48.0, 45.8, 43.4, 42.2, 37.3, 33.7, 33.4, 31.7, 21.4, 20.5 ppm;

**HRMS (ESI, TOF)**: calculated for [C<sub>27</sub>H<sub>33</sub>NO<sub>3</sub>Na]<sup>+</sup> 442.2353, found 442.2360.

## 1.2.6 Preparation of Sarglamide D (**4**)

### Sarglamide E (**5**) and compound **20**

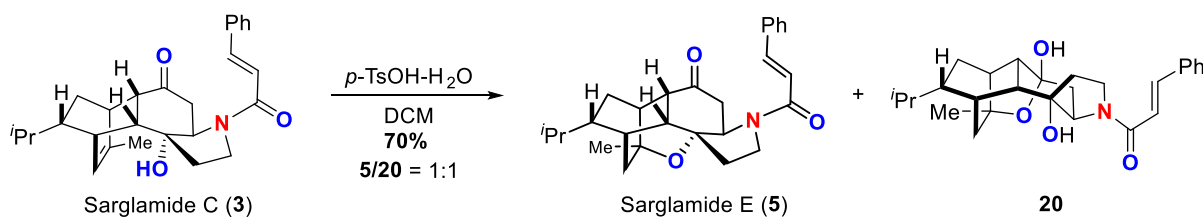

To a solution of Sarglamide C (**3**) (22 mg, 0.05 mmol, 1.0 equiv.) in DCM (0.5 mL) under argon atmosphere, was added *p*-TsOH·H<sub>2</sub>O (0.95 mg, 0.005 mmol, 0.1 equiv.) at room temperature. After being stirred for 6 h at 50 °C, the reaction mixture was quenched by NaHCO<sub>3</sub>. The organic phase was separated, and the aqueous phase was extracted with DCM (3 × 1 mL). The combined organic phases were washed with brine, dried over anhydrous Na<sub>2</sub>SO<sub>4</sub>, filtered,

and concentrated under reduced pressure. The residue was purified by PTLC (EtOAc/*n*-Hexane, 2/1) to give Sarglamide E (**5**) (7 mg, yield: 35%) and compound **20** (8 mg, yield: 35%) as white powder.

Compound **20**:

**R<sub>f</sub>** = 0.5 (silica, EtOAc/*n*-Hexane = 1:1);

**<sup>1</sup>H NMR** (400 MHz, CDCl<sub>3</sub>): δ = 7.76 (d, *J* = 15.4 Hz, 1H), 7.72 (d, *J* = 15.5 Hz, 1H), 7.52 (m, 2H), 7.36-7.35 (m, 3H), 6.68 (d, *J* = 15.5 Hz, 1H), 6.64 (d, *J* = 15.4 Hz, 1H), 4.34 (dd, *J* = 10.7, 6.4 Hz, 1H), 4.00 (dd, *J* = 11.2, 6.2 Hz, 1H), 3.83 (m, 1H), 3.81 (dd, *J* = 10.0, 8.4 Hz, 1H), 3.62 (t, *J* = 9.4 Hz, 1H), 3.57 (ddd, *J* = 12.8, 9.9, 1.6 Hz, 1H), 2.63 (dd, *J* = 13.9, 6.3 Hz, 1H), 2.43-2.42 (m, 1H), 2.37 (m, 1H), 2.33 (dd, *J* = 14.2, 6.4 Hz, 1H), 2.33 (m, 1H), 2.31 (m, 1H), 2.29 (m, 1H), 2.27 (m, 1H), 2.09 (m, 1H), 2.02 (m, 1H), 1.97 (m, 1H), 1.88 (dd, *J* = 13.5, 8.2 Hz, 1H), 1.67 (m, 1H), 1.62-1.54 (m, 1H), 1.46 (m, 1H), 1.35 (s, 3H), 1.32 (s, 3H), 1.30-1.29 (m, 1H), 1.21-1.20 (m, 1H), 1.00-0.98 (m, 1H), 0.93-0.91 (d, *J* = 6.4 Hz, 3H), 0.89-0.87 (m, 3H) ppm;

**<sup>13</sup>C NMR** (101 MHz, CDCl<sub>3</sub>): δ = 165.3, 165.1, 142.9, 142.4, 135.3, 135.2, 129.8, 128.9, 128.9, 128.2, 128.1, 118.3, 118.0, 101.3, 82.9, 82.5, 78.5, 77.4, 77.0, 61.4, 60.4, 46.6, 46.5, 45.5, 45.5, 44.6, 42.8, 42.3, 41.7, 39.7, 38.0, 37.7, 36.8, 35.2, 34.9, 33.0, 26.6, 26.4, 25.0, 24.1, 21.1, 20.9 ppm;

**HRMS (ESI, TOF)**: calculated for [C<sub>27</sub>H<sub>35</sub>NO<sub>4</sub>Na]<sup>+</sup> 460.2458, found 460.2455.

#### Sarglamide D (**4**)

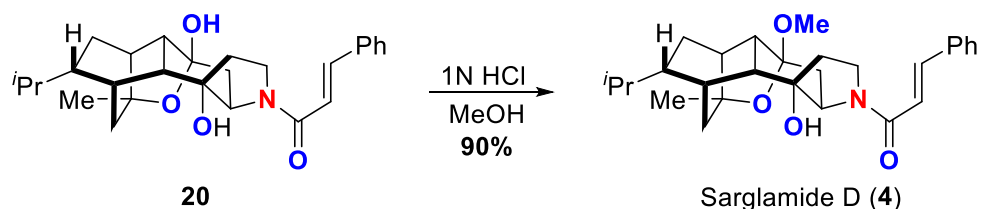

To a solution of compound **20** (4 mg, 0.009 mmol, 1.0 equiv.) in MeOH (0.5 mL), was added 1N HCl (100  $\mu$ L) in one portion. After being stirred for 4 h at room temperature, the reaction mixture was purified by PTLC (EtOAc/*n*-Hexane, 1/2) to give Sarglamide **D** (4 mg, yield:

90%).

**Rf** = 0.6 (silica, EtOAc/*n*-Hexane = 1:1);

**[ $\alpha$ ]<sub>D</sub><sup>25</sup>** = +12 (*c* 0.2, MeOH); lit.<sup>[3]</sup> **[ $\alpha$ ]<sub>D</sub><sup>22</sup>** = +3 (*c* 0.1, MeOH)

**<sup>1</sup>H NMR** (400 MHz, CDCl<sub>3</sub>, Rotamer):  $\delta$  = 7.72 (d, *J* = 15.4 Hz, 1H), 7.72 (d, *J* = 15.4 Hz, 1H), 7.54 (m, 2H), 7.48 (m, 2H), 7.40 (m, 1H), 7.38 (m, 1H), 7.35 (m, 2H), 7.34 (m, 2H), 6.66 (d, *J* = 15.4 Hz, 1H), 6.65 (d, *J* = 15.4, 1H), 4.30 (dd, *J* = 10.9, 6.5 Hz, 1H), 3.94 (dd, *J* = 11.5, 6.3 Hz, 1H), 3.85 (m, 1H), 3.83 (m, 1H), 3.62 (m, 1H), 3.55 (m, 1H), 3.2-3.19 (s, 3H), 2.88 (dd, *J* = 13.6, 6.4 Hz, 1H), 2.52 (dd, *J* = 14.0, 6.4 Hz, 1H), 2.38 (m, 1H), 2.36 (m, 1H), 2.34 (m, 1H), 2.33 (m, 1H), 2.27 (m, 1H), 2.22 (m, 1H), 2.18 (m, 1H), 2.11 (m, 1H), 2.08 (m, 1H), 1.99 (m, 1H), 1.98 (m, 1H), 1.96 (m, 1H), 1.87 (m, 1H), 1.74 (m, 1H), 1.62 (m, 1H), 1.56 (m, 1H), 1.52 (m, 1H), 1.35 (m, 1H), 1.33 (s, 3H), 1.31 (s, 3H), 1.30 (m, 1H), 1.17 (m, 1H), 1.16 (m, 1H), 1.15 (m, 1H), 0.97 (m, 1H), 0.90 (d, *J* = 6.5 Hz, 3H), 0.88-0.87 (d, *J* = 6.5 Hz, 3H) ppm;

**<sup>13</sup>C NMR** (101 MHz, CDCl<sub>3</sub>, Rotamer):  $\delta$  = 165.3, 165.0, 143.0, 142.8, 142.2, 135.4, 135.2, 129.8, 129.7, 128.9, 128.9, 128.3, 128.2, 128.1, 118.4, 118.0, 117.9, 103.5, 101.3, 101.3, 83.1, 82.9, 82.8, 82.6, 78.5, 78.4, 77.4, 61.3, 60.4, 48.6, 48.4, 46.8, 46.7, 46.5, 45.7, 45.6, 45.1, 44.9, 44.6, 42.9, 42.3, 42.2, 41.7, 38.0, 36.8, 36.7, 35.4, 35.0, 34.5, 33.0, 33.0, 32.4, 29.8, 26.5, 26.4, 26.2, 25.0, 24.4, 24.3, 24.2, 24.1, 21.2, 21.0, 20.9 ppm;

**HRMS (ESI, TOF)**: calculated for [C<sub>28</sub>H<sub>37</sub>NO<sub>4</sub>+Na]<sup>+</sup> 474.2615, found 474.2622.



### 1.2.7 Preparation of compound 10c and 9c

#### Compound 10c

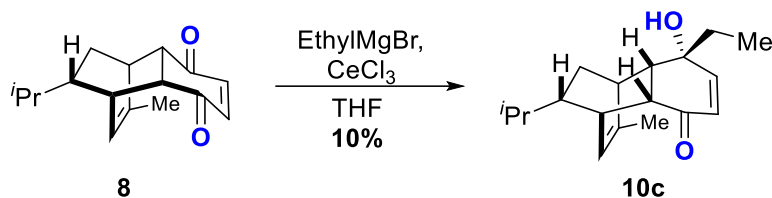

CeCl<sub>3</sub>·7H<sub>2</sub>O (745 mg, 2.0 mmol, 1.0 equiv.) was added to a Schlenk tube (100 mL) and evacuated. The tube was immersed in a pre-heated oil bath (140 °C) with evacuation, while the water was trapped by liquid nitrogen. After 1 h heating without stirring, the cerium chloride was completely dried by a vigorous stirring at the same temperature for an additional 2 h. While the flask was still hot, the flask was filled with argon gas and then cooled to 0 °C. Freshly distilled THF (20 mL) was added to the flask containing cerium chloride at the same temperature and allowed to stir for another 2 h at room temperature.

To the cooled (-78 °C) mixture containing cerium chloride made *in situ* above, ethyl magnesium bromide (2 mL, 2.0 mmol, 2.0 equiv., 1M in THF) was added dropwise and stirred at -78 °C. After being stirred for 2 h, the mixture was added to compound **8** (488 mg, 2.0 mmol, 1.0 equiv.) in THF (5 mL) dropwise at -78 °C. After the addition, the reaction mixture was allowed to stir for an additional 2 h at the 0 °C. The mixture was quenched with saturated aqueous NH<sub>4</sub>Cl. Et<sub>2</sub>O (10 mL) was then added, and the organic layer was separated. The aqueous phase was extracted with Et<sub>2</sub>O (4 × 10 mL). The combined organic phases were washed with brine, dried over anhydrous Na<sub>2</sub>SO<sub>4</sub> and MgSO<sub>4</sub>, filtered, and concentrated under reduced pressure. The residue was purified by flash chromatography on silica gel (eluent: EtOAc/*n*-Hexane, 1/8) to give compound **10c** (52 mg, 10%) as a white powder.

#### Compound 10c:

R<sub>f</sub> = 0.7 (silica, EtOAc/*n*-Hexane, 1/4);

<sup>1</sup>H NMR (400 MHz, CDCl<sub>3</sub>): δ = 6.50 (dd, *J* = 10.3, 1.6 Hz, 1H), 5.80 (d, *J* = 10.3 Hz, 1H), 5.52 – 5.44 (m, 1H), 3.04 (ddd, *J* = 6.4, 3.6, 1.6 Hz, 1H), 2.75 (dt, *J* = 3.1, 1.5 Hz, 1H), 2.64 (dd, *J* = 8.6, 3.6 Hz, 1H), 2.35 – 2.14 (m, 1H), 1.73 (d, *J* = 1.7 Hz, 3H), 1.71 (d, *J* = 3.4 Hz, 1H), 1.66 – 1.60 (m, 2H), 1.55 (dd, *J* = 13.9, 7.4 Hz, 1H), 1.43 – 1.29 (m, 1H), 1.16 – 1.04 (m,

1H), 0.91 (t,  $J = 7.5$  Hz, 3H), 0.87 (d,  $J = 6.6$  Hz, 3H), 0.77 (d,  $J = 6.6$  Hz, 3H) ppm;

$^{13}\text{C}$  NMR (101 MHz,  $\text{CDCl}_3$ ):  $\delta = 201.0, 151.6, 143.8, 130.1, 122.5, 72.3, 51.0, 44.9, 44.2, 40.0, 39.7, 36.3, 34.5, 33.3, 21.2, 20.5, 20.2, 7.4$  ppm;

HRMS (ESI, TOF): calculated for  $[\text{C}_{18}\text{H}_{26}\text{O}_2 + \text{Na}]^+$  297.1825, found 297.1826.

### Compound 9c

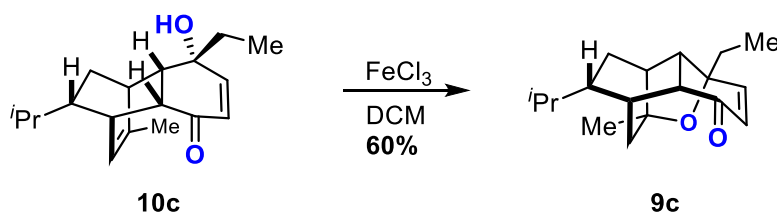

To a solution of compound **10c** (52 mg, 0.19 mmol, 1.0 equiv.) in DCM (2 mL) under argon atmosphere, was added  $\text{FeCl}_3$  (51 mg, 0.19 mmol, 1.0 equiv.). After being stirred for 1 h at the same temperature, the reaction mixture was quenched with saturated aqueous  $\text{NaHCO}_3$ , and the organic layer was separated. The aqueous phase was extracted with DCM ( $3 \times 2$  mL). The combined organic phases were washed with brine, dried over anhydrous  $\text{Na}_2\text{SO}_4$ , filtered, and concentrated under reduced pressure. The residue was purified by flash chromatography on silica gel (eluent:  $\text{EtOAc}/n$ -Hexane, 1/4) to give the corresponding pentacyclic **9c** (31 mg, yield: 60%) as a white powder.

Rf = 0.4 (silica,  $\text{EtOAc}/n$ -Hexane = 1:4);

$^1\text{H}$  NMR (400 MHz,  $\text{CDCl}_3$ ):  $\delta = 6.75$  (d,  $J = 10.3$  Hz, 1H), 6.09 (d,  $J = 10.3$  Hz, 1H), 2.62 (dd,  $J = 8.9, 4.7$  Hz, 1H), 2.47 (dt,  $J = 9.0, 1.5$  Hz, 1H), 2.05 – 1.99 (m, 2H), 1.98 – 1.93 (m, 1H), 1.77 – 1.66 (m, 1H), 1.67 – 1.61 (m, 2H), 1.53 (dt,  $J = 15.2, 1.8$  Hz, 1H), 1.37 – 1.27 (m, 1H), 1.26 (s, 3H), 1.25 – 1.17 (m, 2H), 0.96 – 0.77 (m, 9H) ppm;

$^{13}\text{C}$  NMR (101 MHz,  $\text{CDCl}_3$ ):  $\delta = 201.8, 151.5, 128.9, 82.5, 75.6, 49.2, 45.0, 42.9, 42.2, 33.8, 33.8, 33.7, 32.8, 24.7, 23.8, 21.1, 20.5, 9.1$  ppm;

HRMS (ESI, TOF): calculated for  $[\text{C}_{18}\text{H}_{27}\text{O}_2]^+$  275.2006, found 275.2010.

### 1.3 NMR Data Comparison<sup>[3]</sup>

<sup>1</sup>H-NMR comparison of sarglamide A (**1**) with reported values

| Yue's Isolated Sample<br>(500 MHz, CDCl <sub>3</sub> ) | Our Synthetic Sample<br>(400 MHz, CDCl <sub>3</sub> ) | Δ/ppm |
|--------------------------------------------------------|-------------------------------------------------------|-------|
| <i>α</i> 3.57, td (9.9, 7.3)                           | <i>α</i> 3.55, m                                      | 0.02  |
| <i>β</i> 3.48, m                                       | <i>β</i> 3.47, m                                      | 0.01  |
| 1.87, m                                                | 1.87, m                                               | 0.00  |
| 2.42, dd (10.1, 2.0)                                   | 2.42, dd (10.4, 1.5)                                  | 0.00  |
| 2.61, ddd (10.1, 2.3, 2.3)                             | 2.60, m                                               | 0.01  |
| <i>α</i> 3.04, dd (17.8, 10.8)                         | <i>α</i> 3.04, dd (17.9, 10.8)                        | 0.00  |
| <i>β</i> 2.14, ddd (17.8, 2.2, 2.2)                    | <i>β</i> 2.11, m                                      | 0.03  |
| 4.38, ddd (10.8, 2.3, 2.3)                             | 4.37, d (10.6)                                        | 0.01  |
| 6.44, d (15.5)                                         | 6.42, d (15.6)                                        | 0.02  |
| 7.61, d (15.5)                                         | 7.60, d (15.6)                                        | 0.01  |
| 7.43, m                                                | 7.42, m                                               | 0.01  |
| 7.34, m                                                | 7.34, m                                               | 0.00  |
| 7.35, m                                                | 7.35, m                                               | 0.00  |
| 5.81, ddq (6.4, 2.0, 1.6)                              | 5.80, d (6.2)                                         | 0.01  |
| 2.74, ddd (6.4, 2.5, 2.0)                              | 2.73, m                                               | 0.01  |
| 1.38, m                                                | 1.37, m                                               | 0.01  |
| <i>α</i> 1.02, ddd (12.7, 5.6, 3.0)                    | <i>α</i> 1.02, m                                      | 0.00  |
| <i>β</i> 1.78, ddd (12.7, 9.0, 2.9)                    | <i>β</i> 1.78, m                                      | 0.00  |
| 3.20, m                                                | 3.21, m                                               | 0.01  |
| 2.15, d (1.6)                                          | 2.15, d (1.3)                                         | 0.00  |
| 1.09, m                                                | 1.09, m                                               | 0.00  |
| 0.80, d (6.5)                                          | 0.79, d (6.5)                                         | 0.01  |
| 0.87, d (6.5)                                          | 0.86, d (6.5)                                         | 0.01  |

<sup>13</sup>C-NMR comparison of sarglamide A (1) with reported values

| Yue's Isolated Sample<br>(125 MHz, CDCl <sub>3</sub> ) | Our Synthetic Sample<br>(101 MHz, CDCl <sub>3</sub> ) | Δ/ppm |
|--------------------------------------------------------|-------------------------------------------------------|-------|
| 43.7                                                   | 43.7                                                  | 0.0   |
| 37.9                                                   | 37.8                                                  | 0.1   |
| 76.7                                                   | 76.5                                                  | 0.2   |
| 46.5                                                   | 46.5                                                  | 0.0   |
| 53.8                                                   | 53.7                                                  | 0.1   |
| 215.0                                                  | 215.0                                                 | 0.0   |
| 46.4                                                   | 46.4                                                  | 0.0   |
| 60.5                                                   | 60.4                                                  | 0.1   |
| 164.6                                                  | 164.6                                                 | 0.0   |
| 117.8                                                  | 117.6                                                 | 0.2   |
| 142.5                                                  | 142.5                                                 | 0.0   |
| 135.0                                                  | 134.9                                                 | 0.1   |
| 128.1                                                  | 128.0                                                 | 0.1   |
| 129.0                                                  | 129.0                                                 | 0.0   |
| 130.0                                                  | 130.1                                                 | 0.1   |
| 143.2                                                  | 143.2                                                 | 0.0   |
| 123.4                                                  | 123.3                                                 | 0.1   |
| 39.2                                                   | 39.1                                                  | 0.1   |
| 46.6                                                   | 46.5                                                  | 0.1   |
| 33.3                                                   | 33.2                                                  | 0.1   |
| 36.7                                                   | 36.7                                                  | 0.0   |
| 20.8                                                   | 20.7                                                  | 0.1   |
| 33.6                                                   | 33.5                                                  | 0.1   |
| 20.5                                                   | 20.4                                                  | 0.1   |
| 21.3                                                   | 21.2                                                  | 0.1   |

<sup>1</sup>H-NMR comparison of sarglamide C (**3**) with reported values

| Yue's Isolated Sample<br>(500 MHz, CDCl <sub>3</sub> ) | Our Synthetic Sample<br>(400 MHz, CDCl <sub>3</sub> ) | Δ/ppm |
|--------------------------------------------------------|-------------------------------------------------------|-------|
| <i>α</i> 3.76, td (9.8, 7.6)                           | <i>α</i> 3.76 (q, 9.6)                                | 0.00  |
| <i>β</i> 3.56, td (9.3, 2.0)                           | <i>β</i> 3.57 (td, 8.9, 1.3)                          | 0.01  |
| 1.92, m                                                | 1.92 (m)                                              | 0.00  |
| 2.35, dd (9.9, 1.6)                                    | 2.35, d (9.9)                                         | 0.00  |
| 2.68, ddd (9.9, 2.4, 2.4)                              | 2.68, d (9.9)                                         | 0.00  |
| <i>α</i> 2.93, dd (17.8, 10.6)                         | <i>α</i> 2.93, dd (17.8, 10.6)                        | 0.00  |
| <i>β</i> 2.17, dd (17.8, 2.2, 2.2)                     | <i>β</i> 2.17, d (17.8)                               | 0.00  |
| 4.43, ddd (10.6, 2.2, 2.2)                             | 4.43, d (10.2)                                        | 0.00  |
| 6.53, d (15.5)                                         | 6.54, d (15.4)                                        | 0.01  |
| 7.62, d (15.5)                                         | 7.63, d (15.5)                                        | 0.01  |
| 7.44, m                                                | 7.45, m                                               | 0.01  |
| 7.33, m                                                | 7.33, m                                               | 0.00  |
| 7.35, m                                                | 7.35, m                                               | 0.00  |
| 6.02, ddq (6.4, 1.8, 1.6)                              | 6.01, d (6.3)                                         | 0.01  |
| 3.34, ddd (6.8, 1.8, 1.8)                              | 3.33, d (6.4)                                         | 0.01  |
| 1.31, m                                                | 1.31, m                                               | 0.00  |
| <i>α</i> 1.02, ddd (13.1, 3.9, 3.9)                    | <i>α</i> 1.02, m                                      | 0.00  |
| <i>β</i> 1.79, m                                       | <i>β</i> 1.78, m                                      | 0.01  |
| 2.52, m                                                | 2.52, m                                               | 0.00  |
| 1.82, d (1.6)                                          | 1.82, d (0.96)                                        | 0.00  |
| 1.09, m                                                | 1.09, m                                               | 0.00  |
| 0.79, d (6.5)                                          | 0.79, d (6.5)                                         | 0.00  |
| 0.95, d (6.5)                                          | 0.95, d (6.5)                                         | 0.00  |

<sup>13</sup>C-NMR comparison of sarglamide C (**3**) with reported values

| Yue's Isolated Sample<br>(125 MHz, CDCl <sub>3</sub> ) | Our Synthetic Sample<br>(101 MHz, CDCl <sub>3</sub> ) | Δ/ppm |
|--------------------------------------------------------|-------------------------------------------------------|-------|
| 43.4                                                   | 43.4                                                  | 0.0   |
| 37.3                                                   | 37.3                                                  | 0.0   |
| 77.0                                                   | 77.0                                                  | 0.0   |
| 48.0                                                   | 48.0                                                  | 0.0   |
| 52.7                                                   | 52.6                                                  | 0.1   |
| 214.6                                                  | 214.5                                                 | 0.1   |
| 45.8                                                   | 45.8                                                  | 0.0   |
| 61.1                                                   | 61.1                                                  | 0.0   |
| 165.0                                                  | 164.9                                                 | 0.1   |
| 118.1                                                  | 118.0                                                 | 0.1   |
| 142.6                                                  | 142.7                                                 | 0.1   |
| 135.0                                                  | 135.1                                                 | 0.1   |
| 128.1                                                  | 128.1                                                 | 0.0   |
| 128.9                                                  | 128.9                                                 | 0.0   |
| 130.0                                                  | 130.0                                                 | 0.0   |
| 141.6                                                  | 141.8                                                 | 0.2   |
| 124.6                                                  | 124.5                                                 | 0.1   |
| 33.7                                                   | 33.7                                                  | 0.0   |
| 48.2                                                   | 48.1                                                  | 0.1   |
| 31.7                                                   | 31.7                                                  | 0.0   |
| 42.3                                                   | 42.2                                                  | 0.1   |
| 21.4                                                   | 21.4                                                  | 0.0   |
| 33.4                                                   | 33.4                                                  | 0.0   |
| 20.5                                                   | 20.5                                                  | 0.0   |
| 21.4                                                   | 21.4                                                  | 0.0   |

<sup>1</sup>H-NMR comparison of sarglamide D (4) (Rotamer A) with reported values

| Yue's Isolated Sample<br>(500 MHz, CDCl <sub>3</sub> ) | Our Synthetic Sample<br>(400 MHz, CDCl <sub>3</sub> ) | Δ/ppm |
|--------------------------------------------------------|-------------------------------------------------------|-------|
| <i>α</i> 3.83, m                                       | <i>α</i> 3.83, m                                      | 0.00  |
| <i>β</i> 3.56, m                                       | <i>β</i> 3.55, m                                      | 0.01  |
| <i>α</i> 1.87, m                                       | <i>α</i> 1.87, m                                      | 0.00  |
| <i>β</i> 2.27, m                                       | <i>β</i> 2.27, m                                      | 0.00  |
| 2.08, m                                                | 2.08, m                                               | 0.00  |
| 2.22, dd (9.6, 4.2)                                    | 2.22, m                                               | 0.00  |
| <i>α</i> 2.52, dd (14.1, 6.4)                          | <i>α</i> 2.52, dd (14.0, 6.4)                         | 0.00  |
| <i>β</i> 1.35, dd (14.1, 11.3)                         | <i>β</i> 1.35, m                                      | 0.00  |
| 3.94, dd (11.3, 6.4)                                   | 3.94, dd (11.5, 6.3)                                  | 0.00  |
| 6.64, d (15.5)                                         | 6.65, d (15.4)                                        | 0.01  |
| 7.68, d (15.5)                                         | 7.72, d (15.4)                                        | 0.04  |
| 7.48, m                                                | 7.48, m                                               | 0.00  |
| 7.34, m                                                | 7.34, m                                               | 0.00  |
| 7.35, m                                                | 7.35, m                                               | 0.00  |
| <i>α</i> 1.62, m                                       | <i>α</i> 1.62, m                                      | 0.00  |
| <i>β</i> 1.52, m                                       | <i>β</i> 1.52, m                                      | 0.00  |
| 2.38, m                                                | 2.38, m                                               | 0.00  |
| 0.97, m                                                | 0.97, m                                               | 0.00  |
| <i>α</i> 1.15, m                                       | <i>α</i> 1.15, m                                      | 0.00  |
| <i>β</i> 1.98, m                                       | <i>β</i> 1.98, m                                      | 0.00  |
| 2.34, m                                                | 2.34, m                                               | 0.00  |
| 1.30, s                                                | 1.31, s                                               | 0.01  |
| 1.30, m                                                | 1.30, m                                               | 0.00  |
| 0.90, d (6.5)                                          | 0.90, d (6.5)                                         | 0.00  |
| 0.88, d (6.5)                                          | 0.87, d (6.5)                                         | 0.01  |
| 3.19, s                                                | 3.19, s                                               | 0.00  |

<sup>13</sup>C-NMR comparison of sarglamide D (4) (Rotamer A) with reported values

| <b>Yue's Isolated Sample<br/>(125 MHz, CDCl<sub>3</sub>)</b> | <b>Our Synthetic Sample<br/>(101 MHz, CDCl<sub>3</sub>)</b> | <b>Δ/ppm</b> |
|--------------------------------------------------------------|-------------------------------------------------------------|--------------|
| 41.6                                                         | 41.7                                                        | 0.1          |
| 36.7                                                         | 36.7                                                        | 0.0          |
| 78.6                                                         | 78.5                                                        | 0.1          |
| 45.7                                                         | 45.7                                                        | 0.0          |
| 44.9                                                         | 443.9                                                       | 0.0          |
| 103.5                                                        | 103.5                                                       | 0.0          |
| 34.5                                                         | 34.5                                                        | 0.0          |
| 61.3                                                         | 61.3                                                        | 0.0          |
| 165.1                                                        | 165.0                                                       | 0.1          |
| 118.4                                                        | 118.4                                                       | 0.0          |
| 142.3                                                        | 142.2                                                       | 0.1          |
| 135.3                                                        | 135.2                                                       | 0.1          |
| 128.3                                                        | 128.3                                                       | 0.0          |
| 128.9                                                        | 128.9                                                       | 0.0          |
| 129.8                                                        | 129.8                                                       | 0.0          |
| 82.8                                                         | 82.8                                                        | 0.0          |
| 35.1                                                         | 35.0                                                        | 0.1          |
| 26.3                                                         | 26.2                                                        | 0.1          |
| 46.7                                                         | 46.7                                                        | 0.0          |
| 24.1                                                         | 24.1                                                        | 0.0          |
| 42.2                                                         | 42.2                                                        | 0.0          |
| 24.3                                                         | 24.3                                                        | 0.0          |
| 33.0                                                         | 33.0                                                        | 0.0          |
| 20.9                                                         | 20.9                                                        | 0.0          |
| 21.2                                                         | 21.2                                                        | 0.0          |
| 48.6                                                         | 48.6                                                        | 0.0          |



<sup>1</sup>H-NMR comparison of sarglamide D (4) (Rotamer B) with reported values

| Yue's Isolated Sample<br>(500 MHz, CDCl <sub>3</sub> ) | Our Synthetic Sample<br>(400 MHz, CDCl <sub>3</sub> ) | Δ/ppm |
|--------------------------------------------------------|-------------------------------------------------------|-------|
| <i>α</i> 3.85, m                                       | <i>α</i> 3.85, m                                      | 0.00  |
| <i>β</i> 3.62, m                                       | <i>β</i> 3.62, m                                      | 0.00  |
| <i>α</i> 1.96, m                                       | <i>α</i> 1.96, m                                      | 0.00  |
| <i>β</i> 2.33, m                                       | <i>β</i> 2.33, m                                      | 0.00  |
| 2.11, m                                                | 2.10, m                                               | 0.01  |
| 2.18, dd (9.7, 4.2)                                    | 2.18, m                                               | 0.00  |
| <i>α</i> 2.88, dd (13.7, 6.4)                          | <i>α</i> 2.88, dd (13.6, 6.4)                         | 0.00  |
| <i>β</i> 1.16, dd (13.7, 11.0)                         | <i>β</i> 1.16, m                                      | 0.00  |
| 4.30, dd (11.0, 6.4)                                   | 4.30, dd (10.9, 6.5)                                  | 0.00  |
| 6.66, d (15.5)                                         | 6.66, d (15.4)                                        | 0.00  |
| 7.77, d (15.5)                                         | 7.77, d (15.4)                                        | 0.00  |
| 7.54, m                                                | 7.54, m                                               | 0.00  |
| 7.38, m                                                | 7.38, m                                               | 0.00  |
| 7.40, m                                                | 7.40, m                                               | 0.00  |
| <i>α</i> 1.74, m                                       | <i>α</i> 1.74, m                                      | 0.00  |
| <i>β</i> 1.56, m                                       | <i>β</i> 1.56, m                                      | 0.00  |
| 2.36, m                                                | 2.36, m                                               | 0.00  |
| 0.97, m                                                | 0.97, m                                               | 0.00  |
| <i>α</i> 1.17, m                                       | <i>α</i> 1.17, m                                      | 0.00  |
| <i>β</i> 1.99, m                                       | <i>β</i> 1.99, m                                      | 0.00  |
| 2.34, m                                                | 2.34, m                                               | 0.00  |
| 1.33, s                                                | 1.33, s                                               | 0.00  |
| 1.30, m                                                | 1.30, m                                               | 0.00  |
| 0.90, d (6.5)                                          | 0.90, d (6.5)                                         | 0.00  |
| 0.88, d (6.5)                                          | 0.88, d (6.5)                                         | 0.00  |
| 3.20, s                                                | 3.2, s                                                | 0.00  |

<sup>13</sup>C-NMR comparison of sarglamide D (4) (Rotamer B) with reported values

| <b>Yue's Isolated Sample<br/>(125 MHz, CDCl<sub>3</sub>)</b> | <b>Our Synthetic Sample<br/>(101 MHz, CDCl<sub>3</sub>)</b> | <b>Δ/ppm</b> |
|--------------------------------------------------------------|-------------------------------------------------------------|--------------|
| 42.8                                                         | 42.9                                                        | 0.1          |
| 38.0                                                         | 38.0                                                        | 0.0          |
| 77.1                                                         | 77.4                                                        | 0.3          |
| 45.6                                                         | 45.6                                                        | 0.0          |
| 45.2                                                         | 45.1                                                        | 0.1          |
| 103.5                                                        | 103.5                                                       | 0.0          |
| 32.4                                                         | 32.4                                                        | 0.0          |
| 60.4                                                         | 60.4                                                        | 0.0          |
| 165.3                                                        | 165.3                                                       | 0.0          |
| 118.0                                                        | 118.0                                                       | 0.0          |
| 143.0                                                        | 143.0                                                       | 0.0          |
| 135.4                                                        | 135.4                                                       | 0.0          |
| 128.1                                                        | 128.1                                                       | 0.0          |
| 128.9                                                        | 128.9                                                       | 0.0          |
| 129.8                                                        | 129.8                                                       | 0.0          |
| 83.1                                                         | 83.1                                                        | 0.0          |
| 35.4                                                         | 35.4                                                        | 0.0          |
| 26.5                                                         | 26.5                                                        | 0.0          |
| 46.8                                                         | 46.8                                                        | 0.0          |
| 24.1                                                         | 24.1                                                        | 0.0          |
| 42.2                                                         | 42.2                                                        | 0.0          |
| 24.3                                                         | 24.3                                                        | 0.0          |
| 33.0                                                         | 33.0                                                        | 0.0          |
| 20.9                                                         | 20.9                                                        | 0.0          |
| 21.2                                                         | 21.2                                                        | 0.0          |
| 48.5                                                         | 48.4                                                        | 0.1          |

<sup>1</sup>H-NMR comparison of sarglamide E (**5**) (Rotamer A) with reported values

| Yue's Isolated Sample<br>(500 MHz, CDCl <sub>3</sub> ) | Our Synthetic Sample<br>(400 MHz, CDCl <sub>3</sub> ) | Δ/ppm |
|--------------------------------------------------------|-------------------------------------------------------|-------|
| <i>α</i> 3.73, m                                       | <i>α</i> 3.73, m                                      | 0.00  |
| <i>β</i> 3.92, m                                       | <i>β</i> 3.92, m                                      | 0.00  |
| <i>α</i> 2.40, m                                       | <i>α</i> 2.39, m                                      | 0.01  |
| <i>β</i> 2.08, m                                       | <i>β</i> 2.08, m                                      | 0.01  |
| 2.60, m                                                | 2.59, m                                               | 0.01  |
| 2.23, m                                                | 2.22, m                                               | 0.01  |
| <i>α</i> 2.37, dd (13.7, 8.1)                          | <i>α</i> 2.37, m                                      | 0.00  |
| <i>β</i> 3.49, dd (13.7, 8.1)                          | <i>β</i> 3.49, m                                      | 0.00  |
| 3.94, dd (8.1, 8.1)                                    | 3.94, m                                               | 0.00  |
| 6.69, d (15.6)                                         | 6.68, d (15.3)                                        | 0.01  |
| 7.70, d (15.6)                                         | 7.69, d (15.3)                                        | 0.01  |
| 7.51, m                                                | 7.51, m                                               | 0.00  |
| 7.37, m                                                | 7.37, m                                               | 0.00  |
| 7.37, m                                                | 7.37, m                                               | 0.00  |
| <i>α</i> 1.48, m                                       | <i>α</i> 1.47, m                                      | 0.01  |
| <i>β</i> 1.57, dd (13.7, 5.9)                          | <i>β</i> 1.58, m                                      | 0.01  |
| 2.19, m                                                | 2.19, m                                               | 0.00  |
| 1.39, m                                                | 1.39, m                                               | 0.00  |
| <i>α</i> 1.81, ddd (12.9, 7.9, 4.7)                    | <i>α</i> 1.81, ddd (12.8, 8.1, 4.7)                   | 0.00  |
| <i>β</i> 1.09, m                                       | <i>β</i> 1.09, m                                      | 0.00  |
| 2.38, m                                                | 2.37, m                                               | 0.01  |
| 1.10, s                                                | 1.09, s                                               | 0.01  |
| 1.49, m                                                | 1.49, m                                               | 0.00  |
| 0.91, d (6.5)                                          | 0.91, d (6.4)                                         | 0.00  |
| 0.93, d (6.5)                                          | 0.93, d (6.4)                                         | 0.00  |

<sup>13</sup>C-NMR comparison of sarglamide E (**5**) (Rotamer A) with reported values

| <b>Yue's Isolated Sample</b><br><b>(125 MHz, CDCl<sub>3</sub>)</b> | <b>Our Synthetic Sample</b><br><b>(101 MHz, CDCl<sub>3</sub>)</b> | <b>Δ/ppm</b> |
|--------------------------------------------------------------------|-------------------------------------------------------------------|--------------|
| 46.1                                                               | 46.1                                                              | 0.0          |
| 35.0                                                               | 35.0                                                              | 0.0          |
| 81.8                                                               | 81.8                                                              | 0.0          |
| 35.2                                                               | 35.2                                                              | 0.0          |
| 45.7                                                               | 45.7                                                              | 0.0          |
| 212.1                                                              | 212.1                                                             | 0.0          |
| 43.8                                                               | 43.8                                                              | 0.0          |
| 63.2                                                               | 63.2                                                              | 0.0          |
| 165.7                                                              | 165.7                                                             | 0.0          |
| 118.2                                                              | 118.2                                                             | 0.0          |
| 142.8                                                              | 142.8                                                             | 0.0          |
| 135.2                                                              | 135.2                                                             | 0.0          |
| 128.0                                                              | 128.1                                                             | 0.1          |
| 129.0                                                              | 129.0                                                             | 0.0          |
| 130.0                                                              | 130.0                                                             | 0.0          |
| 75.7                                                               | 75.7                                                              | 0.0          |
| 31.7                                                               | 31.7                                                              | 0.0          |
| 28.2                                                               | 28.1                                                              | 0.1          |
| 41.8                                                               | 41.8                                                              | 0.0          |
| 29.9                                                               | 29.9                                                              | 0.0          |
| 42.0                                                               | 41.9                                                              | 0.1          |
| 24.0                                                               | 24.0                                                              | 0.0          |
| 29.8                                                               | 29.8                                                              | 0.0          |
| 20.5                                                               | 20.5                                                              | 0.0          |
| 21.8                                                               | 21.8                                                              | 0.0          |

<sup>1</sup>H-NMR comparison of sarglamide E (**5**) (Rotamer B) with reported values

| Yue's Isolated Sample<br>(500 MHz, CDCl <sub>3</sub> ) | Our Synthetic Sample<br>(400 MHz, CDCl <sub>3</sub> ) | Δ/ppm |
|--------------------------------------------------------|-------------------------------------------------------|-------|
| <i>α</i> 4.16, m                                       | <i>α</i> 4.16, m                                      | 0.00  |
| <i>β</i> 3.92, m                                       | <i>β</i> 3.92, m                                      | 0.00  |
| <i>α</i> 2.40, m                                       | <i>α</i> 2.40, m                                      | 0.00  |
| <i>β</i> 1.98, m                                       | <i>β</i> 1.98, m                                      | 0.00  |
| 2.61, m                                                | 2.60, m                                               | 0.00  |
| 2.23, m                                                | 2.23, m                                               | 0.00  |
| <i>α</i> 2.55, dd (13.7, 8.1)                          | <i>α</i> 2.55, m                                      | 0.00  |
| <i>β</i> 3.05, dd (13.7, 8.1)                          | <i>β</i> 3.05, m                                      | 0.00  |
| 4.00, dd (8.1, 8.1)                                    | 4.00, m                                               | 0.00  |
| 6.54, d (15.6)                                         | 6.54, d (15.3)                                        | 0.00  |
| 7.67, d (15.6)                                         | 7.67, d (15.3)                                        | 0.00  |
| 7.51, m                                                | 7.51, m                                               | 0.00  |
| 7.37, m                                                | 7.37, m                                               | 0.00  |
| 7.37, m                                                | 7.37, m                                               | 0.00  |
| <i>α</i> 1.48, m                                       | <i>α</i> 1.48, m                                      | 0.00  |
| <i>β</i> 1.57, dd (13.7, 5.9)                          | <i>β</i> 1.57, m                                      | 0.00  |
| 2.19, m                                                | 2.19, m                                               | 0.00  |
| 1.39, m                                                | 1.39, m                                               | 0.00  |
| <i>α</i> 1.81, ddd (12.9, 7.9, 4.7)                    | <i>α</i> 1.81, ddd (12.8, 8.1, 4.7)                   | 0.00  |
| <i>β</i> 1.09, m                                       | <i>β</i> 1.09, m                                      | 0.00  |
| 2.38, m                                                | 2.38, m                                               | 0.00  |
| 1.10, s                                                | 1.09, s                                               | 0.01  |
| 1.49, m                                                | 1.49, m                                               | 0.00  |
| 0.91, d (6.5)                                          | 0.91, d (6.4)                                         | 0.00  |
| 0.93, d (6.5)                                          | 0.93, d (6.4)                                         | 0.00  |

<sup>13</sup>C-NMR comparison of sarglamide E (**5**) (Rotamer B) with reported values

| Yue's Isolated Sample<br>(125 MHz, CDCl <sub>3</sub> ) | Our Synthetic Sample<br>(101 MHz, CDCl <sub>3</sub> ) | Δ/ppm |
|--------------------------------------------------------|-------------------------------------------------------|-------|
| 45.8                                                   | 45.7                                                  | 0.0   |
| 34.4                                                   | 34.4                                                  | 0.0   |
| 83.4                                                   | 83.4                                                  | 0.0   |
| 35.2                                                   | 35.2                                                  | 0.0   |
| 45.7                                                   | 45.7                                                  | 0.0   |
| 211.1                                                  | 211.2                                                 | 0.1   |
| 45.6                                                   | 45.7                                                  | 0.1   |
| 62.9                                                   | 62.9                                                  | 0.0   |
| 165.7                                                  | 165.7                                                 | 0.0   |
| 118.2                                                  | 118.2                                                 | 0.0   |
| 142.8                                                  | 142.8                                                 | 0.0   |
| 135.2                                                  | 135.2                                                 | 0.0   |
| 128.0                                                  | 128.1                                                 | 0.1   |
| 129.0                                                  | 129.0                                                 | 0.0   |
| 130.0                                                  | 130.0                                                 | 0.0   |
| 75.7                                                   | 75.7                                                  | 0.0   |
| 31.7                                                   | 31.7                                                  | 0.0   |
| 28.2                                                   | 28.1                                                  | 0.1   |
| 41.8                                                   | 41.8                                                  | 0.0   |
| 29.9                                                   | 29.9                                                  | 0.0   |
| 42.0                                                   | 41.9                                                  | 0.1   |
| 24.0                                                   | 24.0                                                  | 0.0   |
| 29.8                                                   | 29.8                                                  | 0.0   |
| 20.5                                                   | 20.5                                                  | 0.0   |
| 21.8                                                   | 21.8                                                  | 0.0   |

<sup>1</sup>H-NMR comparison of compound **20** (Rotamer A) with reported values

| Yue's Isolated Sample<br>(600 MHz, CDCl <sub>3</sub> ) | Our Synthetic Sample<br>(400 MHz, CDCl <sub>3</sub> ) | Δ/ppm |
|--------------------------------------------------------|-------------------------------------------------------|-------|
| <i>α</i> 3.81, dd (10.0, 8.4)                          | <i>α</i> 3.81, dd (10.0, 8.4)                         | 0.00  |
| <i>β</i> 3.57, ddd (12.8, 9.9, 1.6)                    | <i>β</i> 3.57, ddd (12.8, 9.9, 1.6)                   | 0.00  |
| <i>α</i> 1.87, dd (13.5, 8.4)                          | <i>α</i> 1.88, dd (13.5, 8.2)                         | 0.01  |
| <i>β</i> 2.29, m                                       | <i>β</i> 2.29, m                                      | 0.00  |
| 2.09, m                                                | 2.09, m                                               | 0.00  |
| <i>α</i> 2.33, dd (14.2, 6.4)                          | <i>α</i> 2.33, dd (14.2, 6.4)                         | 0.00  |
| <i>β</i> 1.67, dd (14.2, 11.3)                         | <i>β</i> 1.67, m                                      | 0.00  |
| 3.99, dd (11.3, 6.4)                                   | 4.00, dd (11.2, 6.2)                                  | 0.01  |
| 6.66, d (15.5)                                         | 6.64, d (15.4)                                        | 0.02  |
| 7.76, d (15.5)                                         | 7.76, d (15.4)                                        | 0.00  |
| 7.52, m                                                | 7.52, m                                               | 0.00  |
| 7.36, m                                                | 7.36, m                                               | 0.00  |
| 7.36, m                                                | 7.36, m                                               | 0.00  |
| 1.54-1.62, m                                           | 1.54-1.62, m                                          | 0.00  |
| 2.39, m                                                | 2.37, m                                               | 0.02  |
| 0.98, m                                                | 1.00, m                                               | 0.02  |
| <i>α</i> 1.20, m                                       | <i>α</i> 1.21, m                                      | 0.01  |
| <i>β</i> 2.02, m                                       | <i>β</i> 2.02, m                                      | 0.00  |
| 2.42, m                                                | 2.42, m                                               | 0.00  |
| 1.34, s                                                | 1.35, s                                               | 0.01  |
| 1.29, m                                                | 1.30, m                                               | 0.01  |
| 0.92, d (6.5)                                          | 0.93, d (6.4)                                         | 0.01  |
| 0.87, d (6.5)                                          | 0.89, m                                               | 0.02  |

<sup>13</sup>C-NMR comparison of compound **20** (Rotamer A) with reported values

| <b>Yue's Isolated Sample</b><br><b>(125 MHz, CDCl<sub>3</sub>)</b> | <b>Our Synthetic Sample</b><br><b>(101 MHz, CDCl<sub>3</sub>)</b> | <b>Δ/ppm</b> |
|--------------------------------------------------------------------|-------------------------------------------------------------------|--------------|
| 41.7                                                               | 41.7                                                              | 0.0          |
| 36.9                                                               | 36.8                                                              | 0.1          |
| 78.6                                                               | 78.5                                                              | 0.1          |
| 45.5                                                               | 45.5                                                              | 0.0          |
| 44.6                                                               | 44.6                                                              | 0.0          |
| 101.3                                                              | 101.3                                                             | 0.0          |
| 39.7                                                               | 39.7                                                              | 0.0          |
| 61.4                                                               | 61.4                                                              | 0.0          |
| 165.3                                                              | 165.3                                                             | 0.0          |
| 118.1                                                              | 118.1                                                             | 0.0          |
| 142.9                                                              | 142.9                                                             | 0.0          |
| 135.2                                                              | 135.2                                                             | 0.0          |
| 128.2                                                              | 128.2                                                             | 0.0          |
| 128.9                                                              | 128.9                                                             | 0.0          |
| 129.8                                                              | 129.8                                                             | 0.0          |
| 83.0                                                               | 82.9                                                              | 0.1          |
| 35.2                                                               | 35.2                                                              | 0.0          |
| 26.4                                                               | 26.4                                                              | 0.0          |
| 46.5                                                               | 46.5                                                              | 0.0          |
| 24.1                                                               | 24.1                                                              | 0.0          |
| 42.3                                                               | 42.3                                                              | 0.0          |
| 25.0                                                               | 25.0                                                              | 0.0          |
| 33.0                                                               | 33.0                                                              | 0.0          |
| 20.9                                                               | 20.9                                                              | 0.0          |
| 21.1                                                               | 21.1                                                              | 0.0          |



<sup>1</sup>H-NMR comparison of compound **20** (Rotamer B) with reported values

| Yue's Isolated Sample<br>(600 MHz, CDCl <sub>3</sub> ) | Our Synthetic Sample<br>(400 MHz, CDCl <sub>3</sub> ) | Δ/ppm |
|--------------------------------------------------------|-------------------------------------------------------|-------|
| <i>α</i> 3.83, ddd (10.0, 8.0, 5.3)                    | <i>α</i> 3.83, m                                      | 0.00  |
| <i>β</i> 3.62, t (9.4)                                 | <i>β</i> 3.62, t (9.4)                                | 0.00  |
| <i>α</i> 1.97, dd (13.1, 8.0)                          | <i>α</i> 1.97, m                                      | 0.00  |
| <i>β</i> 2.33, m                                       | <i>β</i> 2.33, m                                      | 0.00  |
| 2.09, m                                                | 2.09, m                                               | 0.00  |
| 2.27, m                                                | 2.27, m                                               | 0.00  |
| <i>α</i> 2.61, dd (13.9, 6.4)                          | <i>α</i> 2.63, dd (13.9, 6.3)                         | 0.02  |
| <i>β</i> 1.46, dd (13.9, 11.0)                         | <i>β</i> 1.46, m                                      | 0.00  |
| 4.33, dd (11.0, 6.4)                                   | 4.34, dd (10.7, 6.4)                                  | 0.01  |
| 6.67, d (15.5)                                         | 6.68, d (15.5)                                        | 0.01  |
| 7.70, d (15.5)                                         | 7.72, d (15.5)                                        | 0.02  |
| 7.52, m                                                | 7.52, m                                               | 0.00  |
| 7.36, m                                                | 7.36, m                                               | 0.00  |
| 1.54-1.62, m                                           | 1.54-1.62, m                                          | 0.00  |
| 2.31, m                                                | 2.31, m                                               | 0.00  |
| 0.98, m                                                | 1.00, m                                               | 0.02  |
| <i>α</i> 1.20, m                                       | <i>α</i> 1.20, m                                      | 0.00  |
| <i>β</i> 2.02, m                                       | <i>β</i> 2.02, m                                      | 0.00  |
| 2.42, m                                                | 2.43, m                                               | 0.01  |
| 1.30, s                                                | 1.32, s                                               | 0.02  |
| 1.29, m                                                | 1.29, m                                               | 0.00  |
| 0.91, d (6.5)                                          | 0.91, d (6.4)                                         | 0.00  |
| 0.87, d (6.5)                                          | 0.87, d (6.4)                                         | 0.00  |

<sup>13</sup>C-NMR comparison of compound **20** (Rotamer B) with reported values

| Yue's Isolated Sample<br>(125 MHz, CDCl <sub>3</sub> ) | Our Synthetic Sample<br>(101 MHz, CDCl <sub>3</sub> ) | Δ/ppm |
|--------------------------------------------------------|-------------------------------------------------------|-------|
| 42.7                                                   | 42.8                                                  | 0.1   |
| 38.0                                                   | 38.0                                                  | 0.0   |
| 77.1                                                   | 77.0                                                  | 0.1   |
| 45.5                                                   | 45.5                                                  | 0.0   |
| 44.6                                                   | 44.6                                                  | 0.0   |
| 101.3                                                  | 101.3                                                 | 0.0   |
| 37.7                                                   | 37.7                                                  | 0.0   |
| 60.4                                                   | 60.4                                                  | 0.0   |
| 165.2                                                  | 165.1                                                 | 0.1   |
| 118.3                                                  | 118.3                                                 | 0.0   |
| 142.4                                                  | 142.4                                                 | 0.0   |
| 135.4                                                  | 135.3                                                 | 0.1   |
| 128.2                                                  | 128.2                                                 | 0.0   |
| 128.9                                                  | 128.9                                                 | 0.0   |
| 129.8                                                  | 129.8                                                 | 0.0   |
| 82.6                                                   | 82.5                                                  | 0.1   |
| 35.0                                                   | 34.9                                                  | 0.1   |
| 26.6                                                   | 26.6                                                  | 0.0   |
| 46.6                                                   | 46.6                                                  | 0.0   |
| 24.1                                                   | 24.1                                                  | 0.0   |
| 42.3                                                   | 42.3                                                  | 0.0   |
| 25.0                                                   | 25.0                                                  | 0.0   |
| 33.0                                                   | 33.0                                                  | 0.0   |
| 21.0                                                   | 20.9                                                  | 0.1   |
| 21.1                                                   | 21.1                                                  | 0.0   |



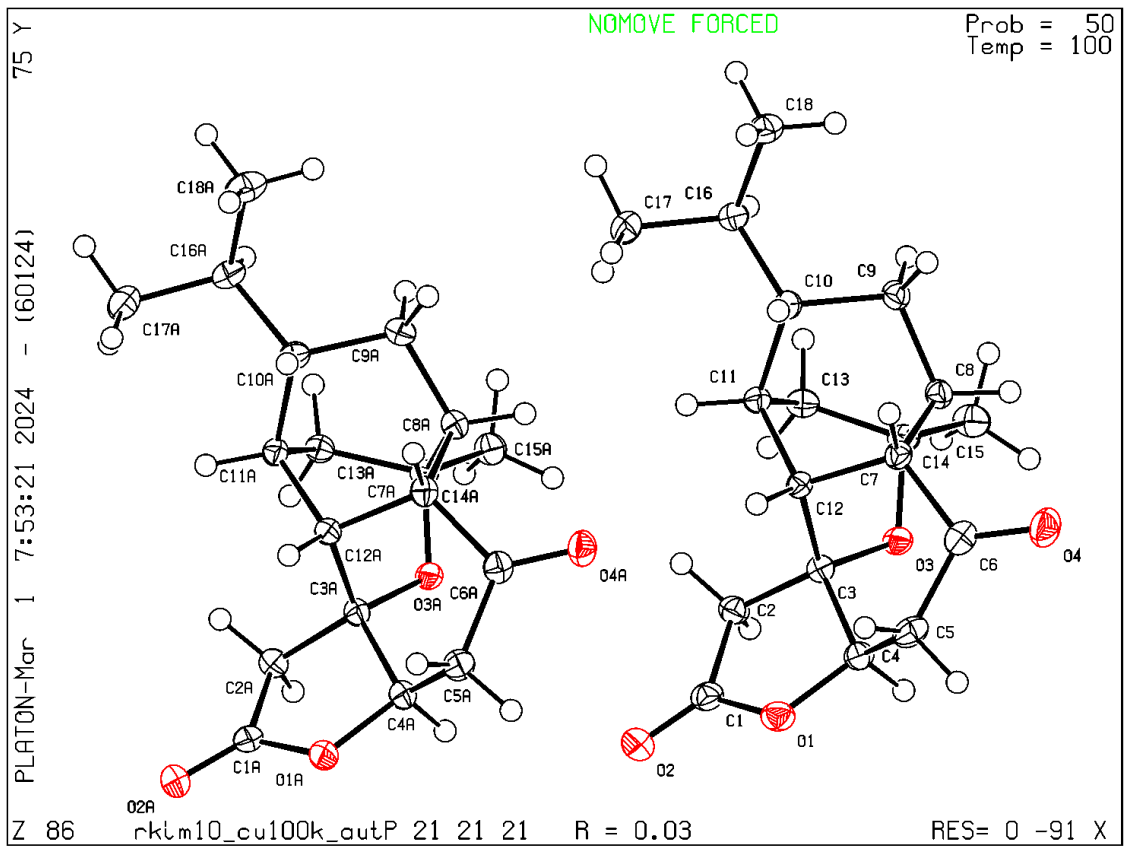

### 3. References

- [1] a) F. Fringuelli, M. Guo, L. Minuti, F. Pizzo, A. Taticchi, E. Wenkert, *J. Org. Chem.* 1989, **54**, 710-712; b) R. K. Schmidt, K. Müther, C. Mück-Lichtenfeld, S. Grimme, M. Oestreich, *J. Am. Chem. Soc.* 2012, **134**, 4421-4428; c) R. A. Valiulin, T. M. Arisco, A. G. Kutateladze, *Org. Lett.* 2010, **12**, 3398-3401.
- [2] S. J. Miller, H. Ishitani, Y. Furiya, S. Kobayashi, *Org. Proc. Res. Dev.* 2021, **25**, 192-198.
- [3] B. Zhou, Q. Gong, Y. Fu, J.-S. Zhou, H.-Y. Zhang, J.-M. Yue, *Org. Lett.* 2023, **25**, 1464-1469.

# 4. <sup>1</sup>H and <sup>13</sup>C NMR Spectra

## <sup>1</sup>H NMR of 8a

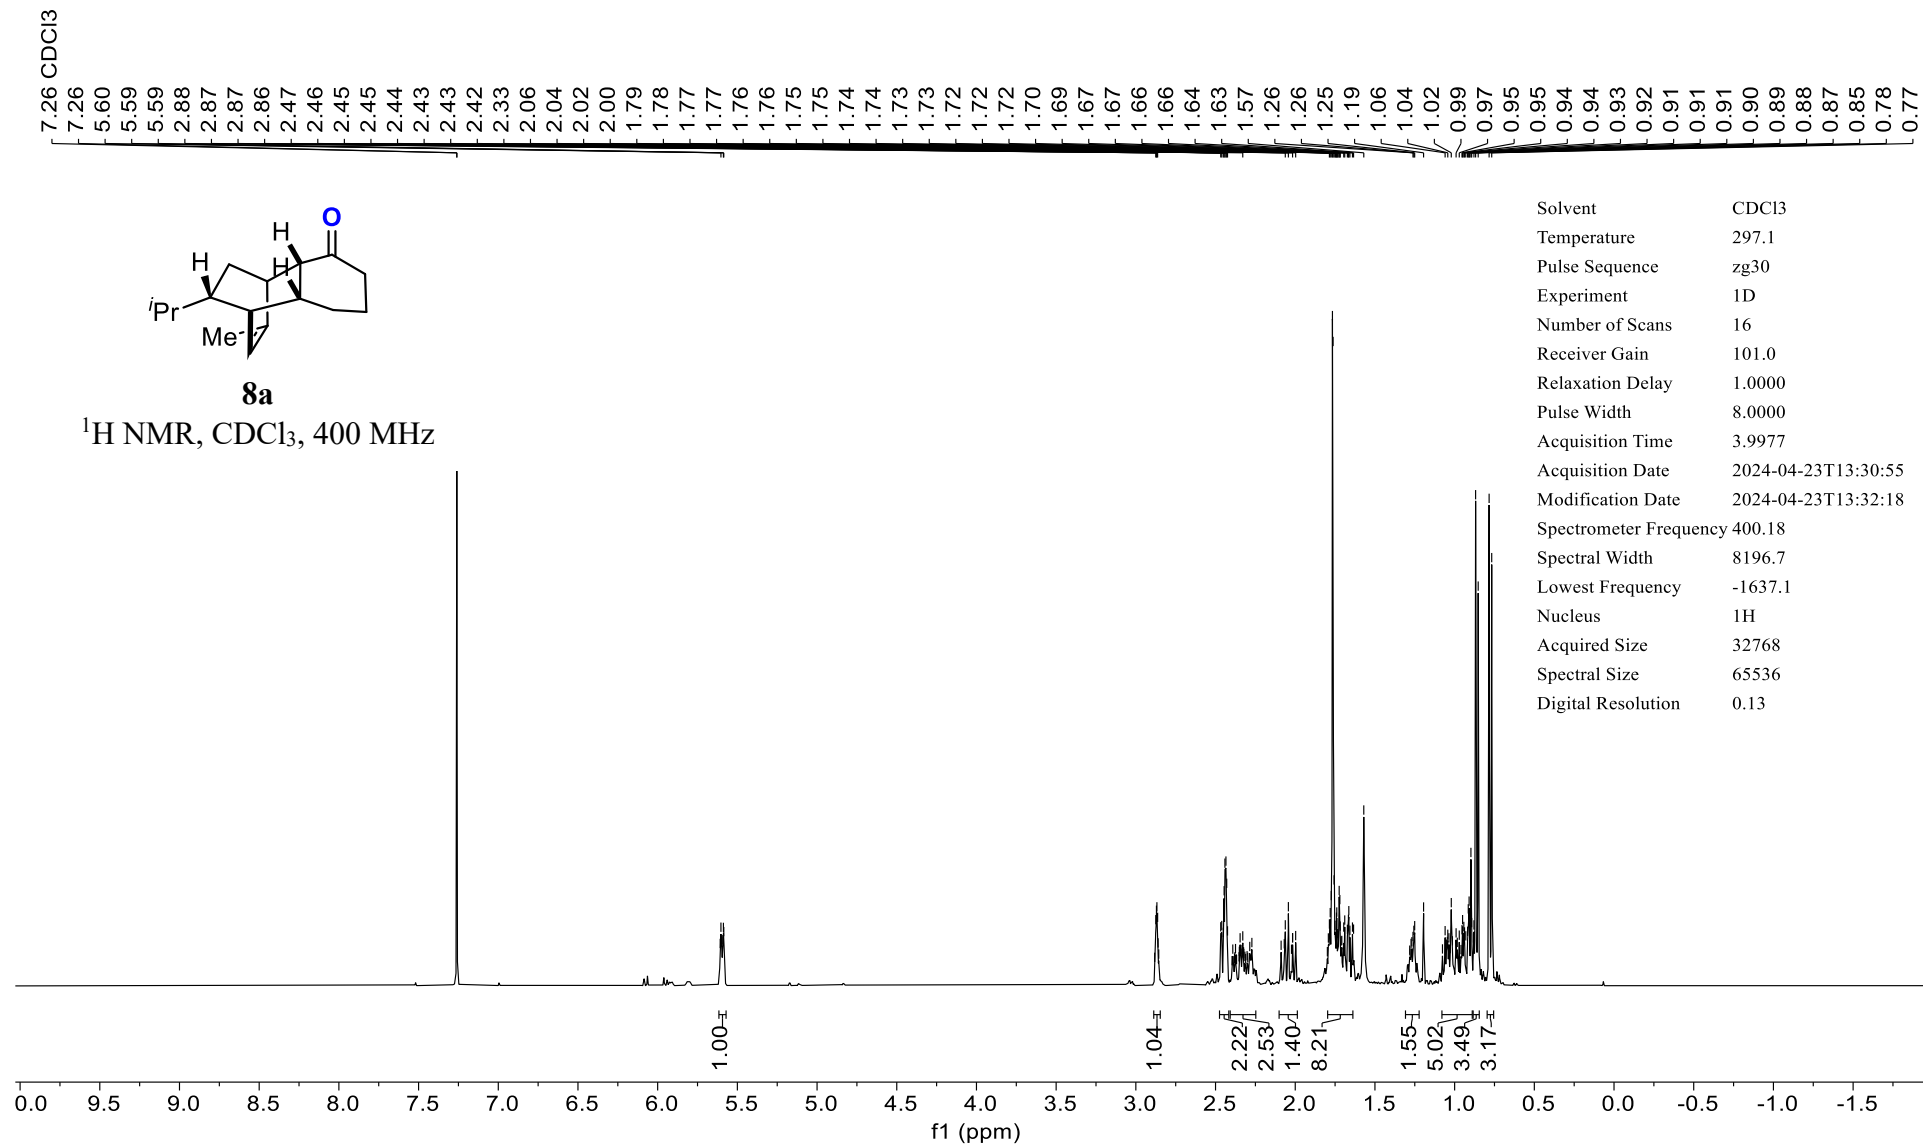

<sup>13</sup>C NMR of **8a**

— 214.67

— 143.04

— 123.08

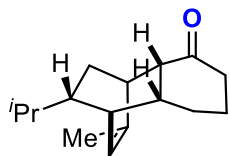

**8a**

<sup>13</sup>C NMR, CDCl<sub>3</sub>, 101 MHz

51.84  
47.32  
43.80  
39.45  
38.96  
37.26  
33.34  
31.21  
29.19  
21.24  
20.99  
20.90  
20.48

|                    |                     |
|--------------------|---------------------|
| Solvent            | CDCl <sub>3</sub>   |
| Temperature        | 297.8               |
| Pulse Sequence     | zgpg30              |
| Experiment         | 1D                  |
| Number of Scans    | 225                 |
| Receiver Gain      | 10.0                |
| Relaxation Delay   | 2.0000              |
| Pulse Width        | 8.0000              |
| Acquisition Time   | 1.2648              |
| Acquisition Date   | 2024-04-23T13:44:40 |
| Modification Date  | 2024-04-23T13:44:42 |
| Spectrometer       | 100.64              |
| Frequency          |                     |
| Spectral Width     | 25906.7             |
| Lowest Frequency   | -2892.7             |
| Nucleus            | 13C                 |
| Acquired Size      | 32768               |
| Spectral Size      | 65536               |
| Digital Resolution | 0.40                |

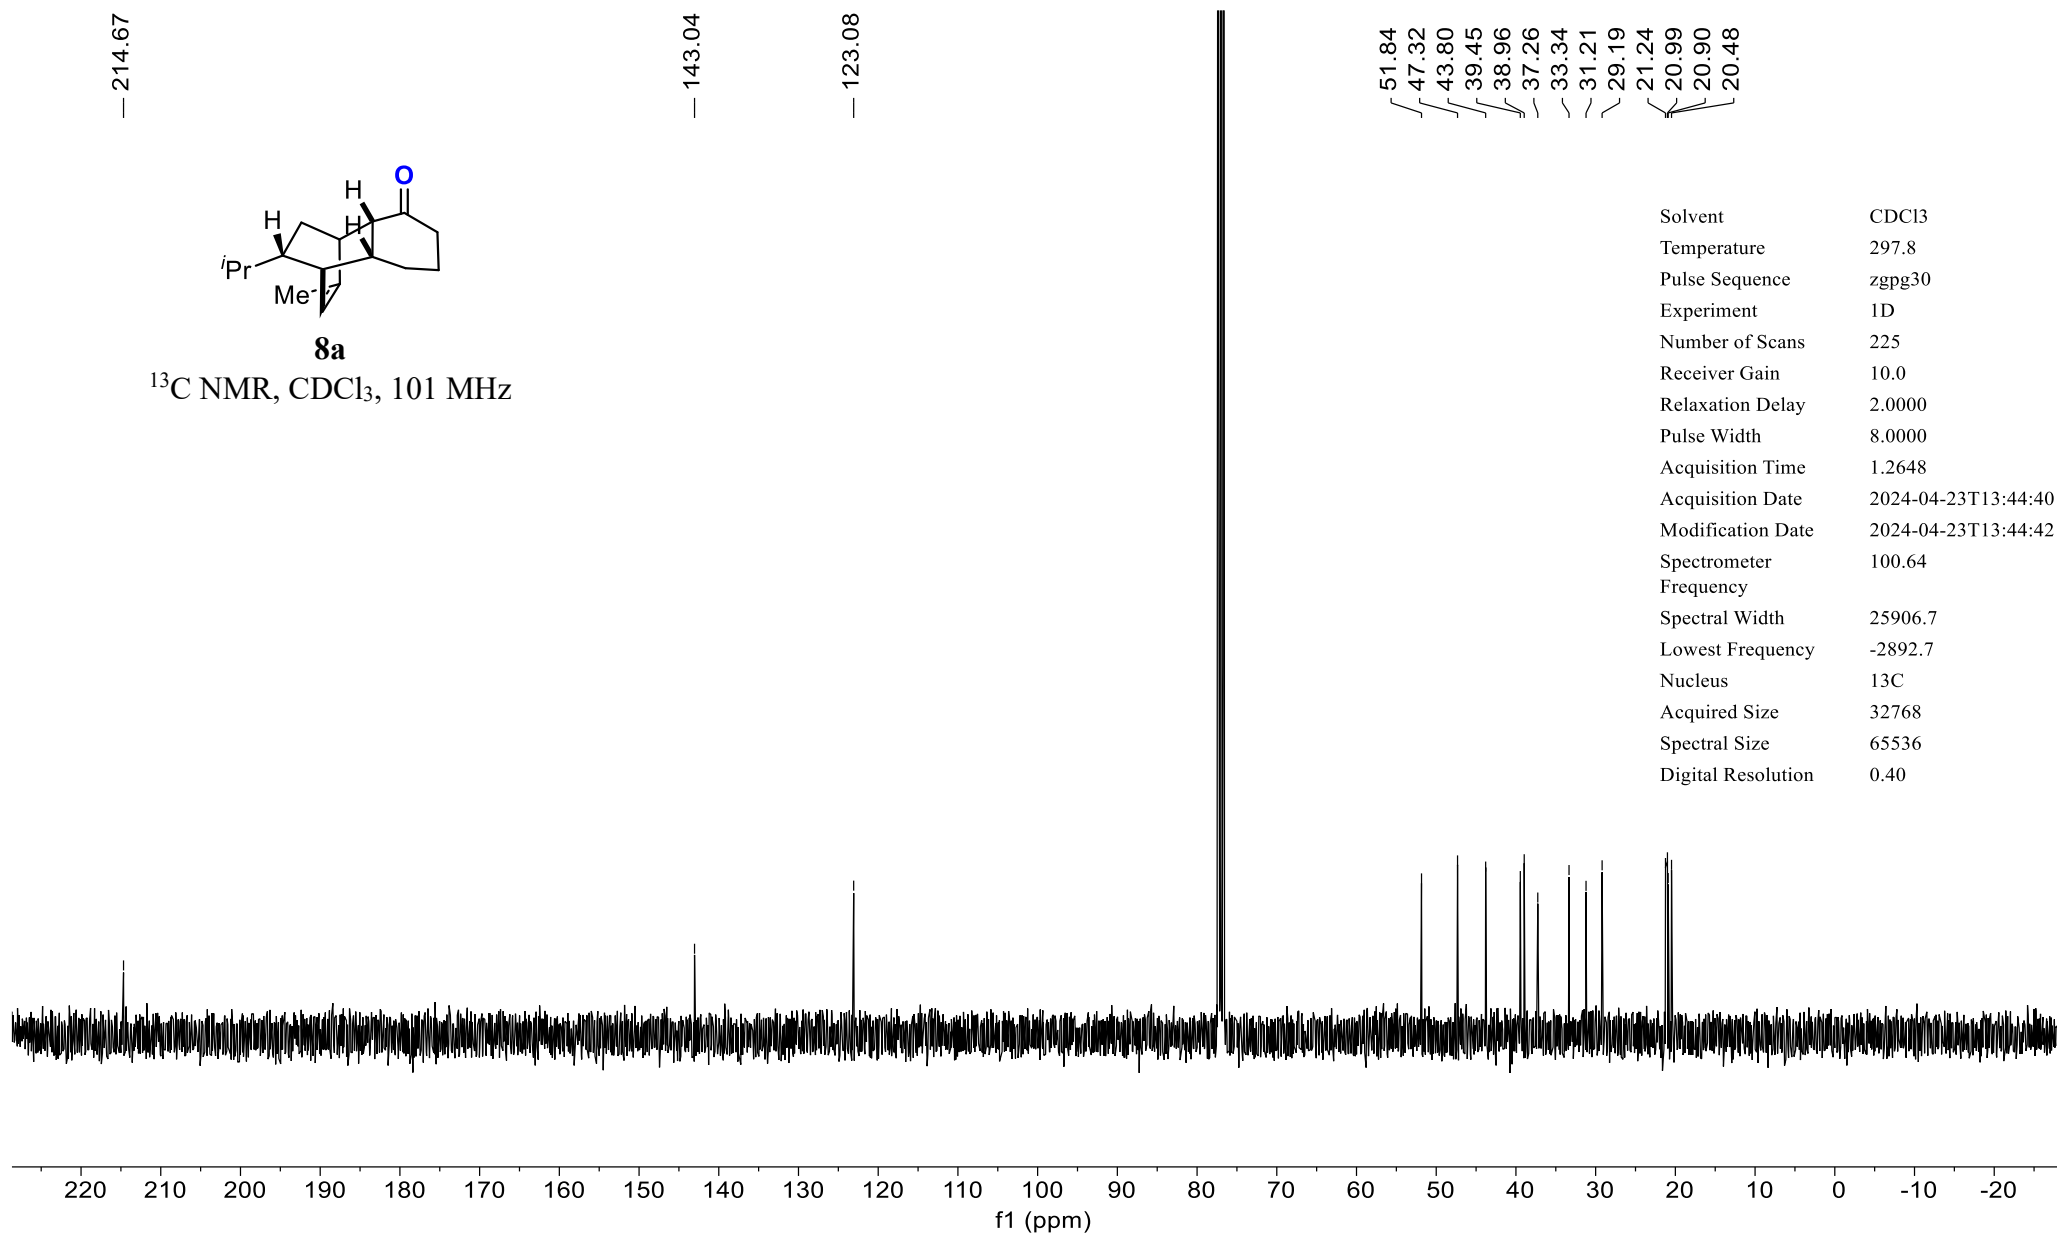

# <sup>1</sup>H NMR of 8b

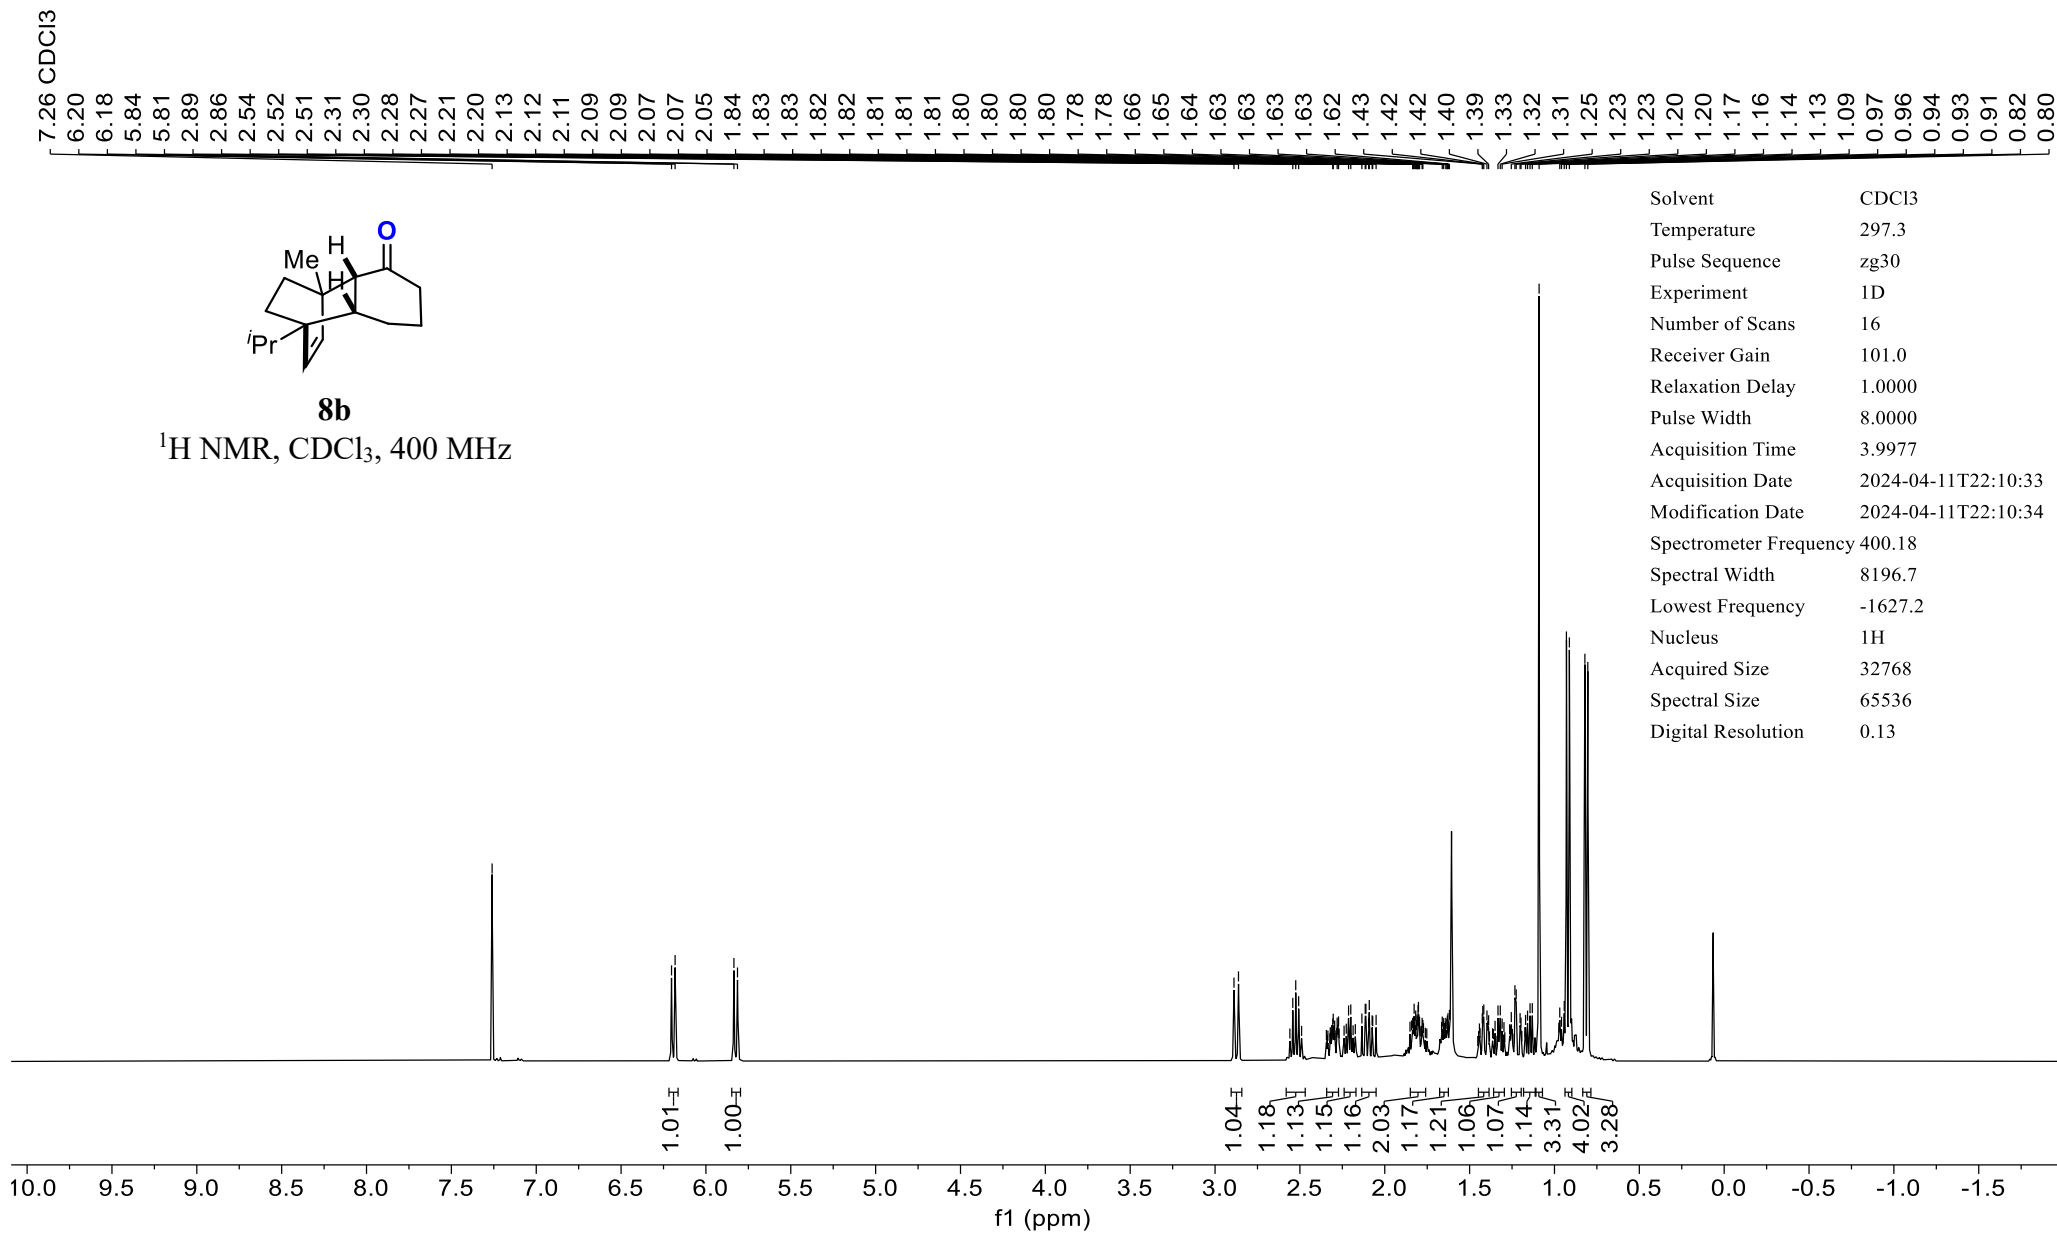



<sup>13</sup>C NMR of **8b**

— 214.49

~ 137.13  
~ 135.60

— 57.02  
/ 49.34  
/ 42.49  
/ 38.74  
/ 36.60  
/ 36.51  
/ 29.45  
/ 25.46  
/ 22.75  
/ 22.51  
/ 21.06  
/ 18.74  
/ 16.76

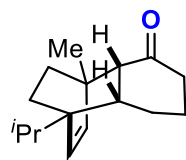

**8b**

<sup>13</sup>C NMR, CDCl<sub>3</sub>, 101 MHz

|                        |                     |
|------------------------|---------------------|
| Solvent                | CDCl <sub>3</sub>   |
| Temperature            | 296.6               |
| Pulse Sequence         | zgpg30              |
| Experiment             | 1D                  |
| Number of Scans        | 63                  |
| Receiver Gain          | 196.9               |
| Relaxation Delay       | 2.0000              |
| Pulse Width            | 9.7000              |
| Acquisition Time       | 1.2583              |
| Acquisition Date       | 2023-11-23T12:56:49 |
| Modification Date      | 2023-11-23T12:56:52 |
| Spectrometer Frequency | 100.62              |
| Spectral Width         | 26041.7             |
| Lowest Frequency       | -2963.4             |
| Nucleus                | <sup>13</sup> C     |
| Acquired Size          | 32768               |
| Spectral Size          | 65536               |
| Digital Resolution     | 0.40                |

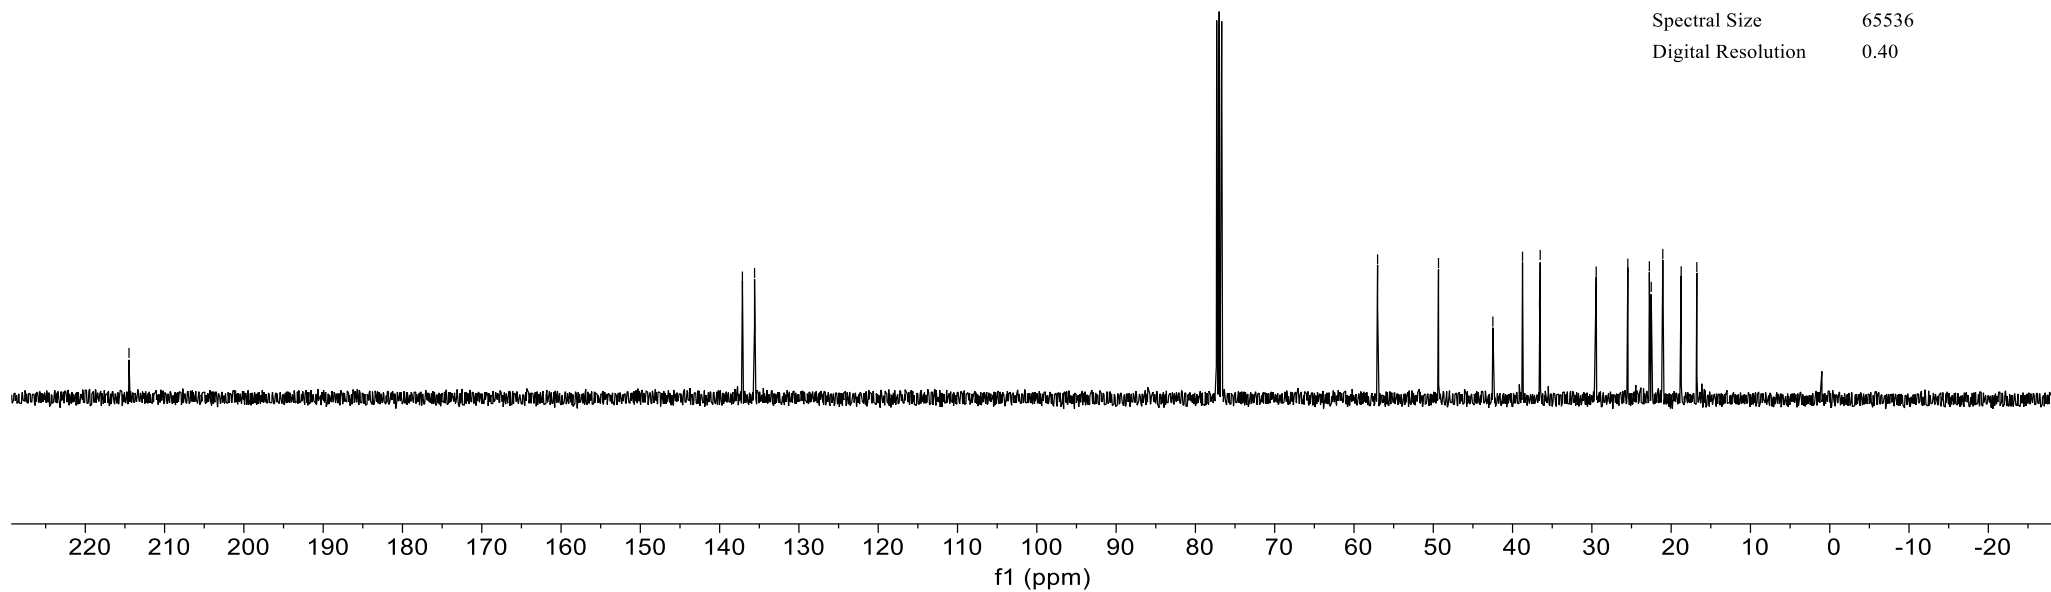

<sup>1</sup>H NMR of 8

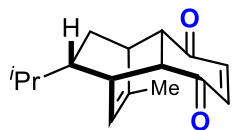

8

<sup>1</sup>H NMR, CDCl<sub>3</sub>, 400 MHz

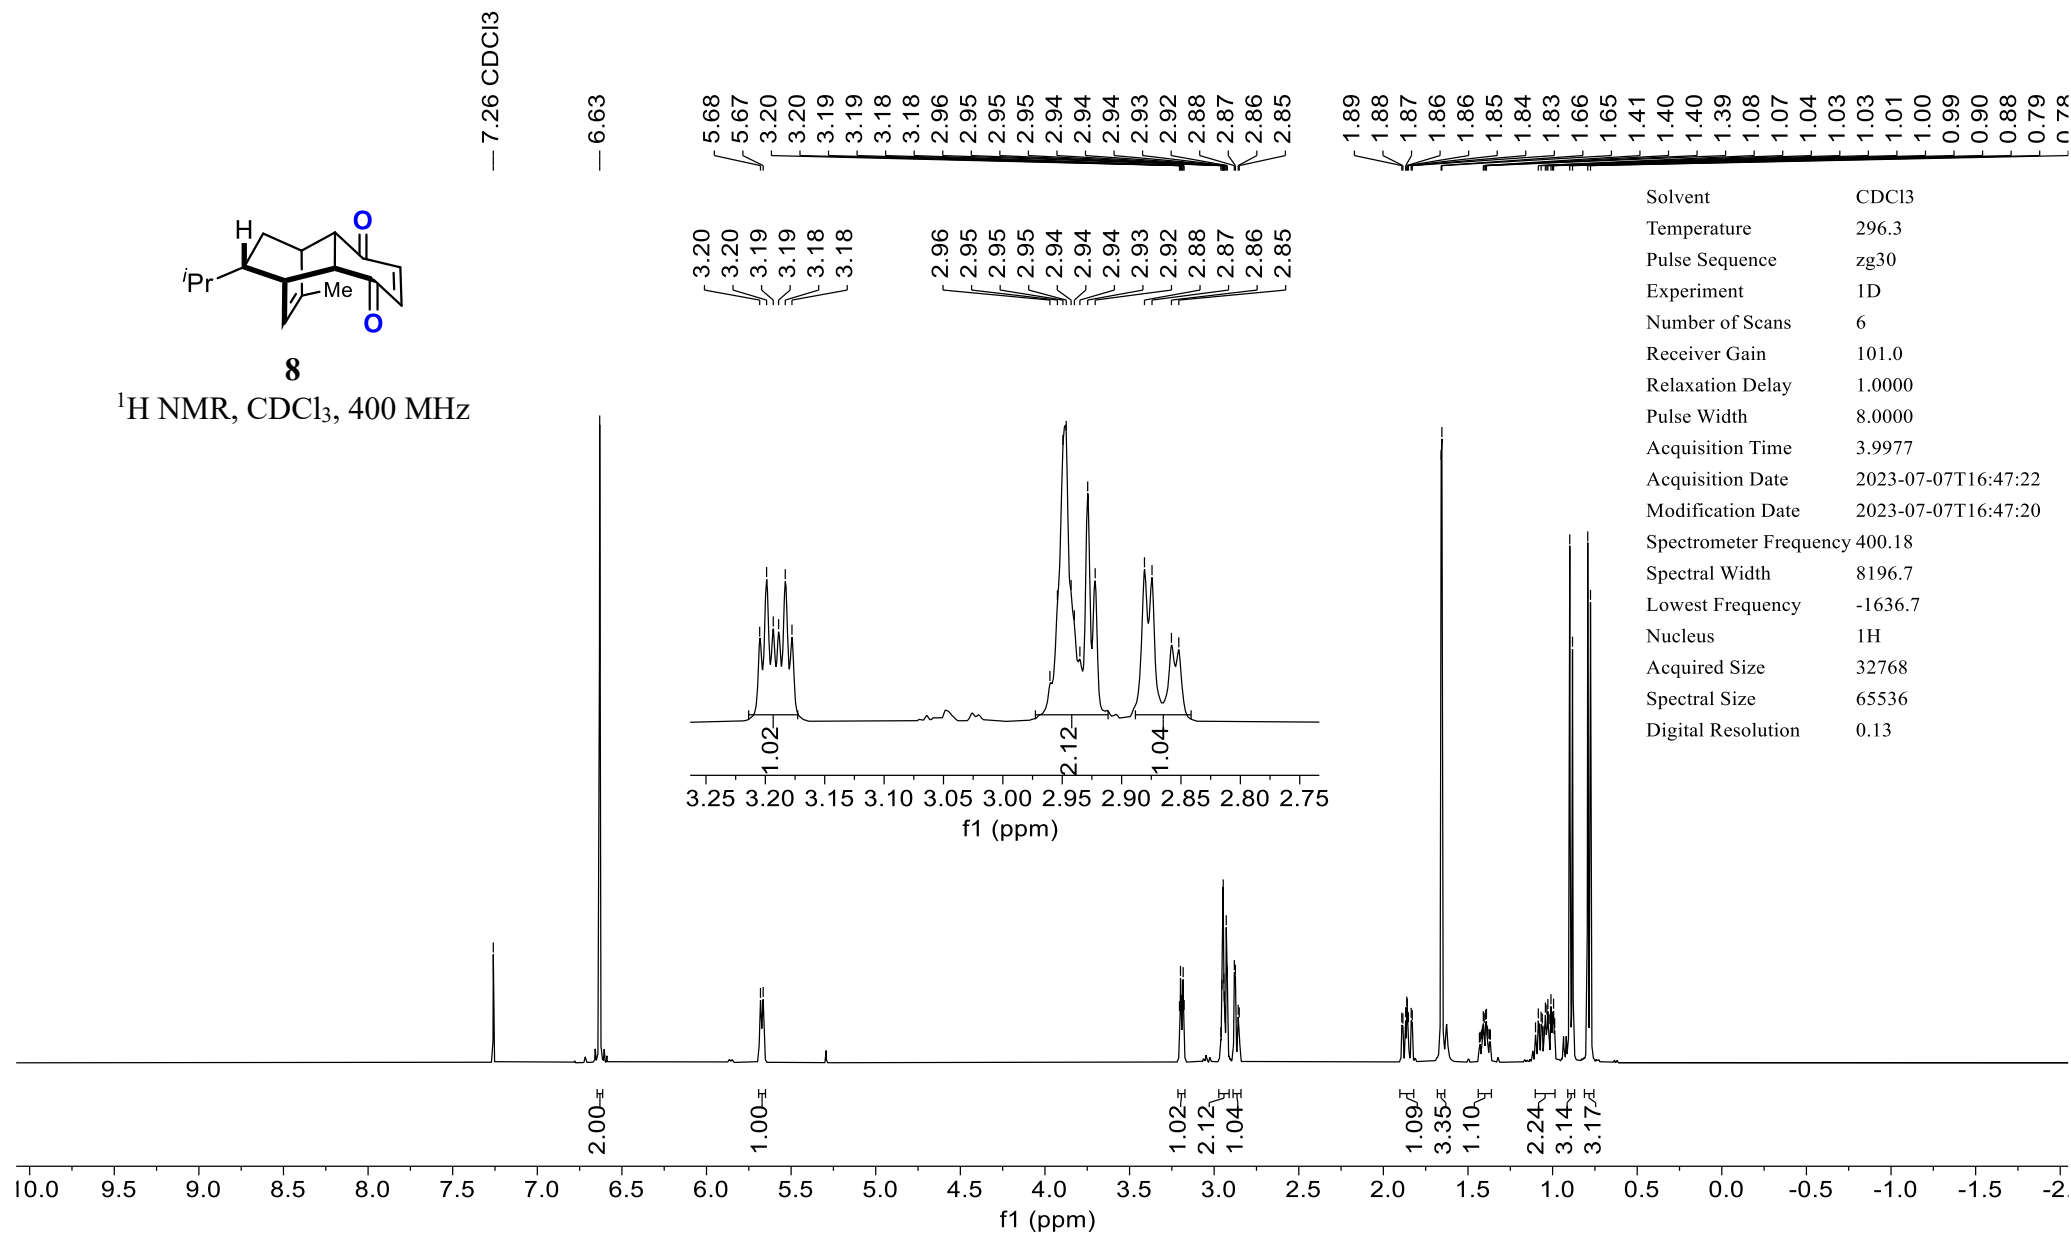

<sup>13</sup>C NMR of **8**

199.83  
199.51

142.54  
142.41  
141.55

123.18

50.73  
48.64  
45.63  
41.70  
39.17  
33.30  
31.72

21.03  
20.73  
20.21

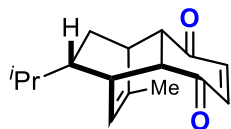

**8**

<sup>13</sup>C NMR, CDCl<sub>3</sub>, 101 MHz

|                        |                     |
|------------------------|---------------------|
| Solvent                | CDCl <sub>3</sub>   |
| Temperature            | 297.2               |
| Pulse Sequence         | zgpg30              |
| Experiment             | 1D                  |
| Number of Scans        | 14                  |
| Receiver Gain          | 10.0                |
| Relaxation Delay       | 2.0000              |
| Pulse Width            | 8.0000              |
| Acquisition Time       | 1.2648              |
| Acquisition Date       | 2023-05-23T19:32:38 |
| Modification Date      | 2023-05-23T19:32:36 |
| Spectrometer Frequency | 100.64              |
| Spectral Width         | 25906.7             |
| Lowest Frequency       | -2894.3             |
| Nucleus                | 13C                 |
| Acquired Size          | 32768               |
| Spectral Size          | 65536               |
| Digital Resolution     | 0.40                |

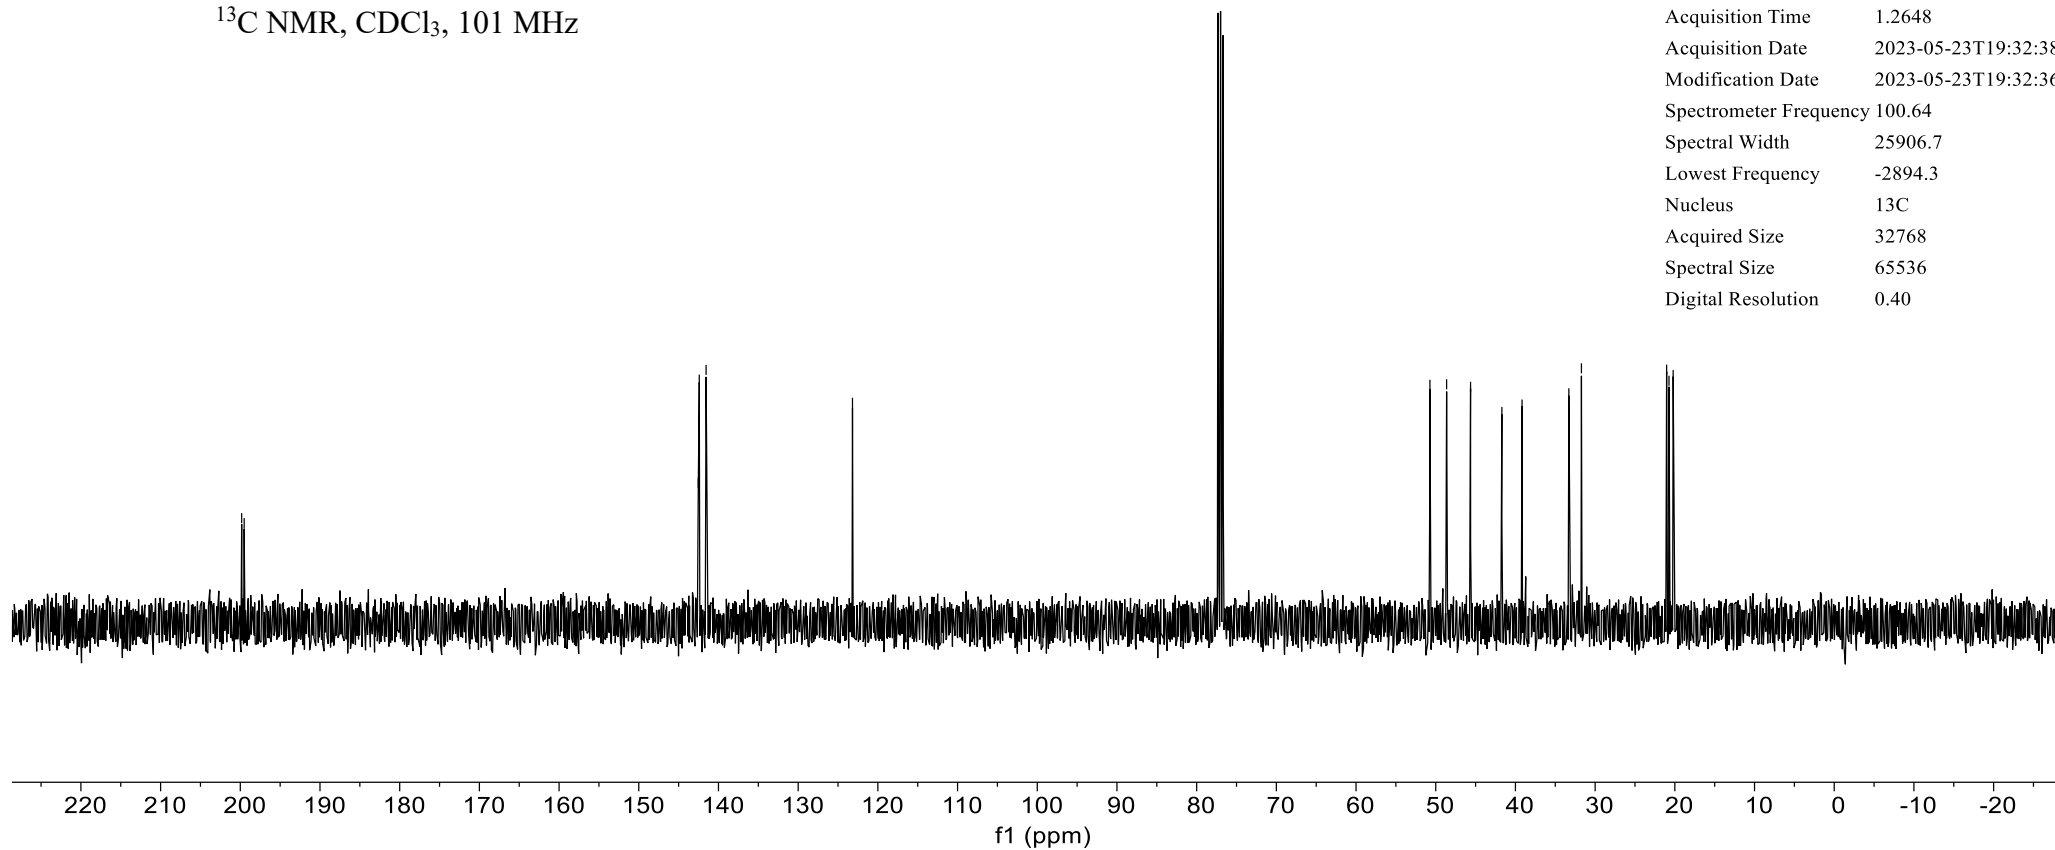

# <sup>1</sup>H NMR of 10a

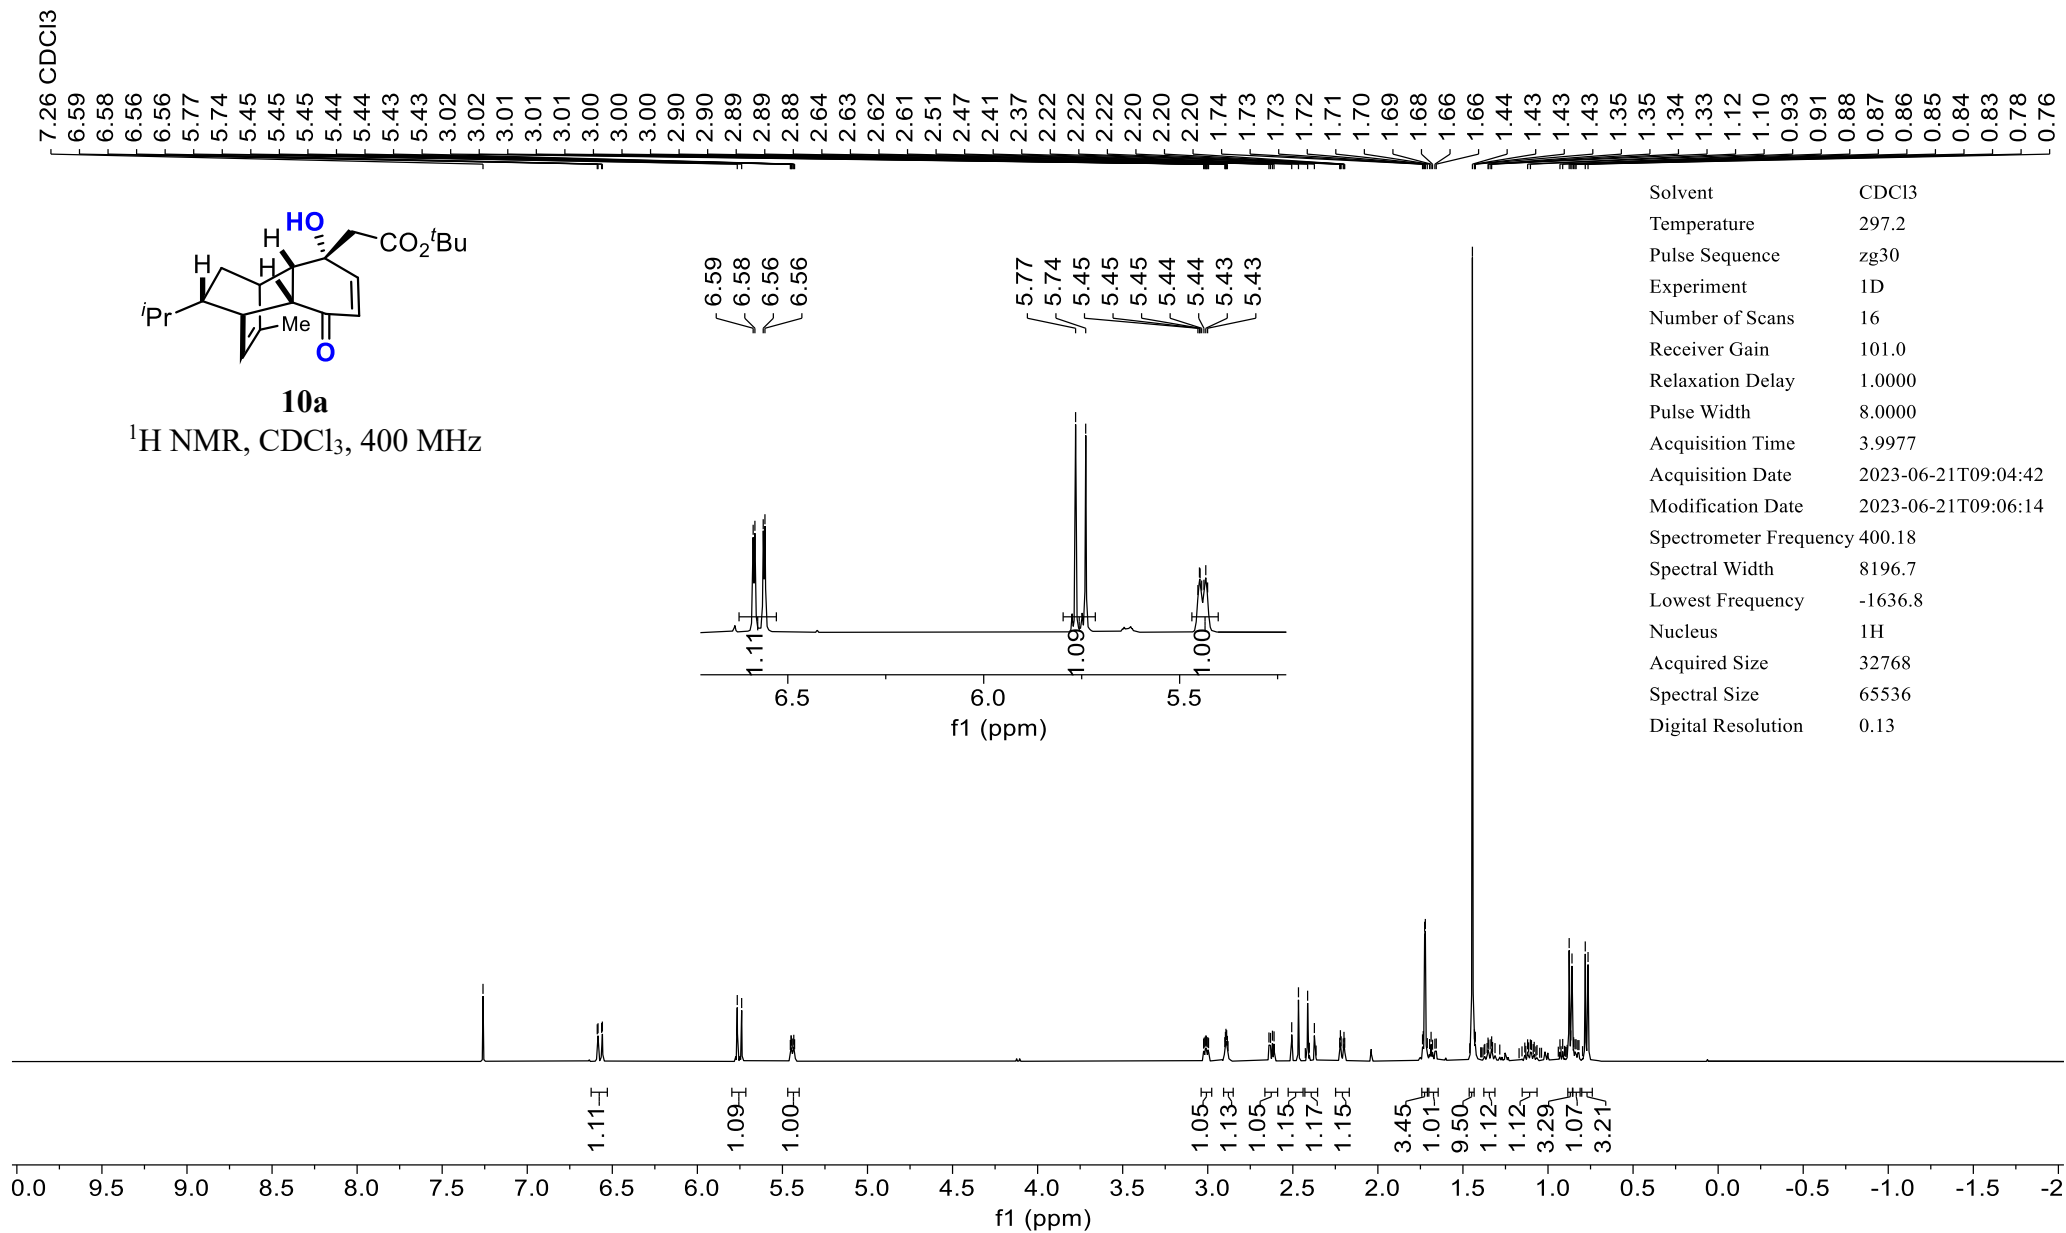

<sup>13</sup>C NMR of **10a**

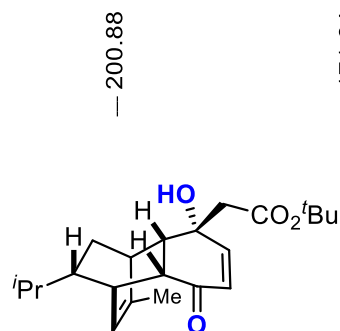

**10a**

<sup>13</sup>C NMR, CDCl<sub>3</sub>, 101 MHz

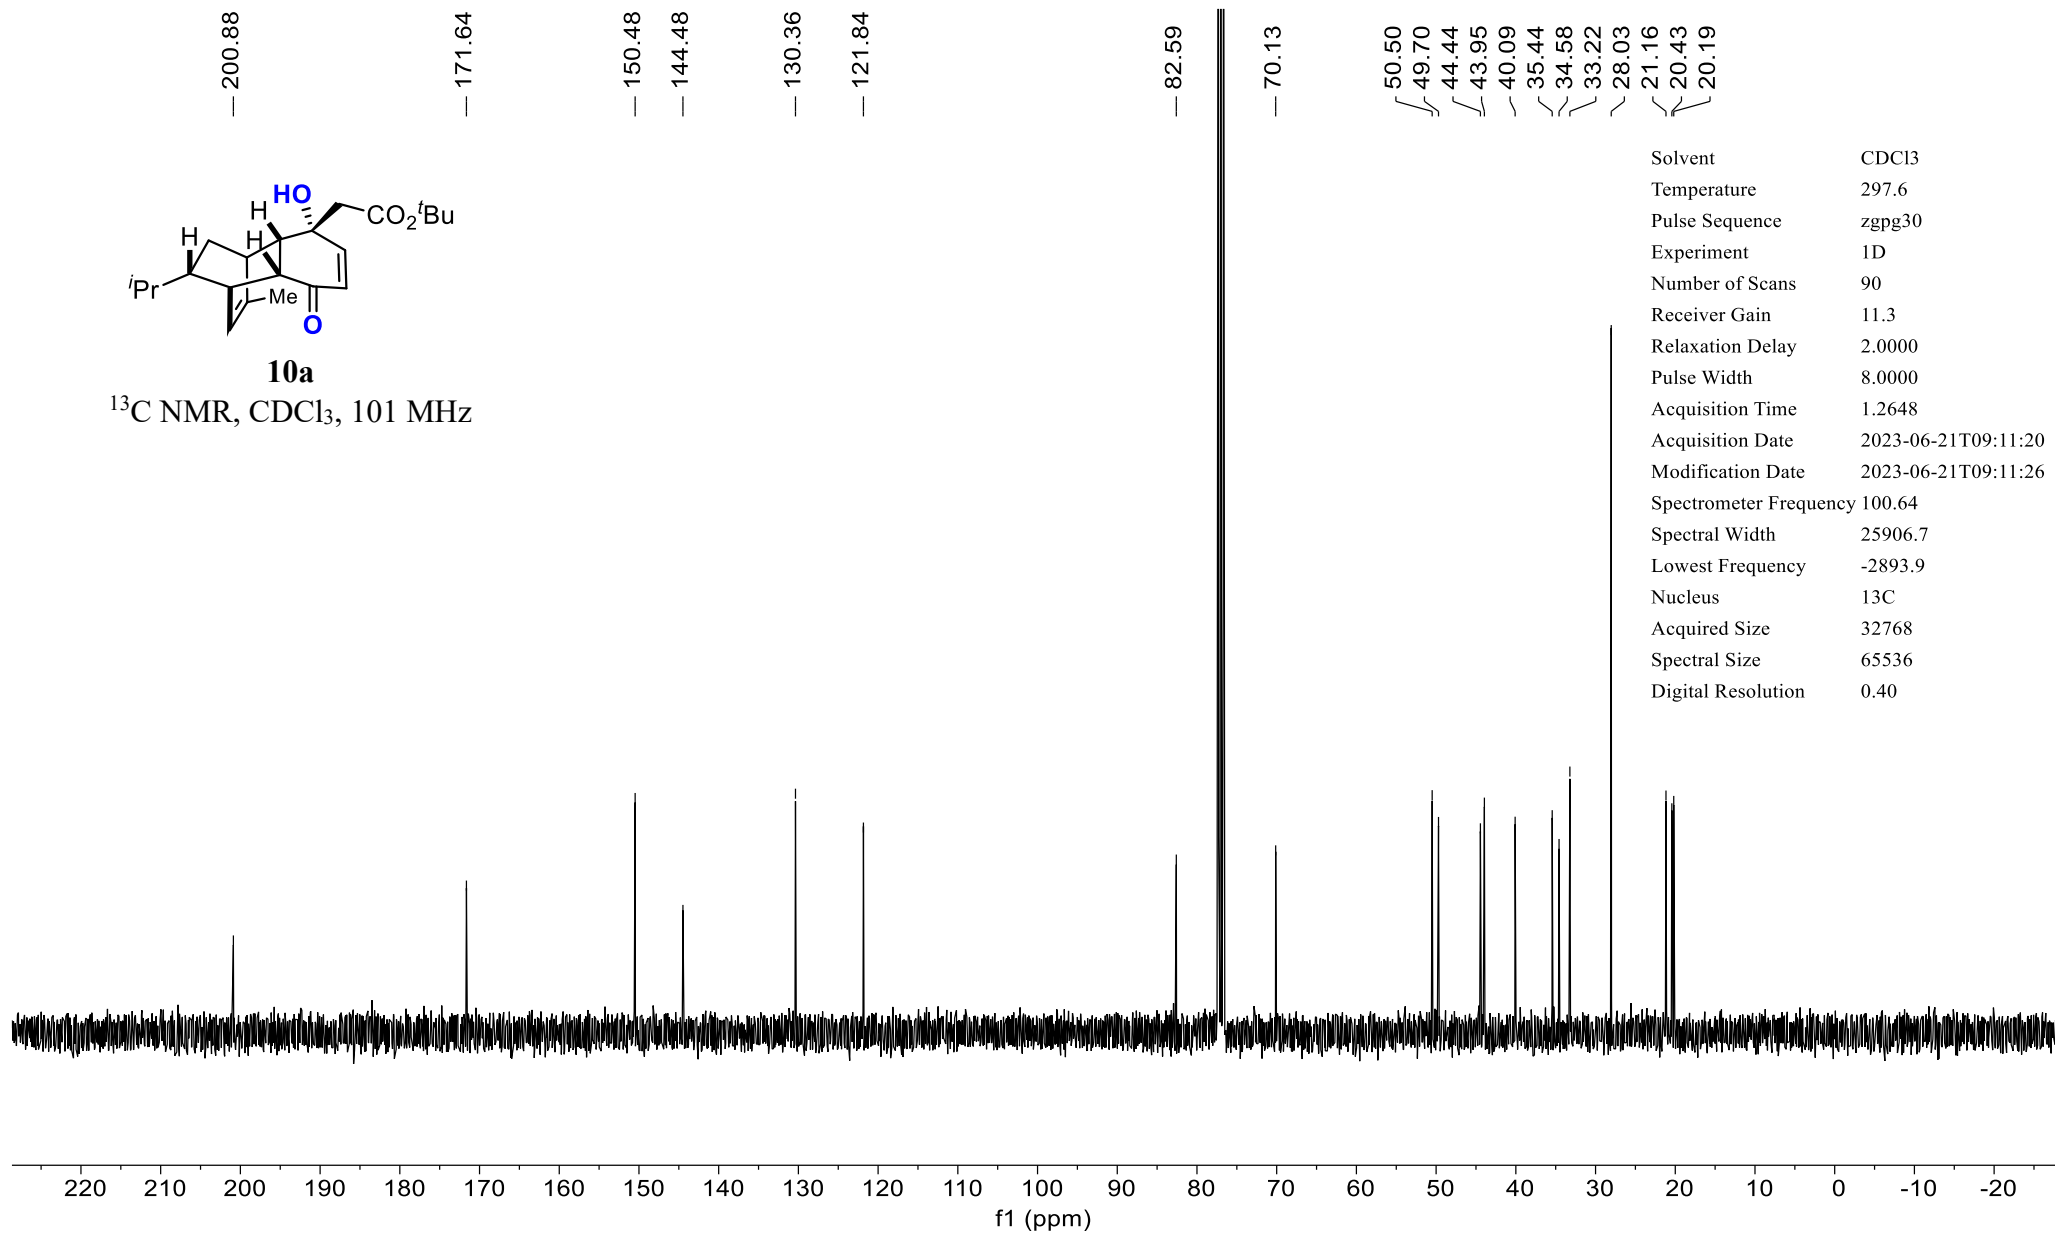

|                        |                     |
|------------------------|---------------------|
| Solvent                | CDCl <sub>3</sub>   |
| Temperature            | 297.6               |
| Pulse Sequence         | zgpg30              |
| Experiment             | 1D                  |
| Number of Scans        | 90                  |
| Receiver Gain          | 11.3                |
| Relaxation Delay       | 2.0000              |
| Pulse Width            | 8.0000              |
| Acquisition Time       | 1.2648              |
| Acquisition Date       | 2023-06-21T09:11:20 |
| Modification Date      | 2023-06-21T09:11:26 |
| Spectrometer Frequency | 100.64              |
| Spectral Width         | 25906.7             |
| Lowest Frequency       | -2893.9             |
| Nucleus                | <sup>13</sup> C     |
| Acquired Size          | 32768               |
| Spectral Size          | 65536               |
| Digital Resolution     | 0.40                |

<sup>1</sup>H NMR of **10b**

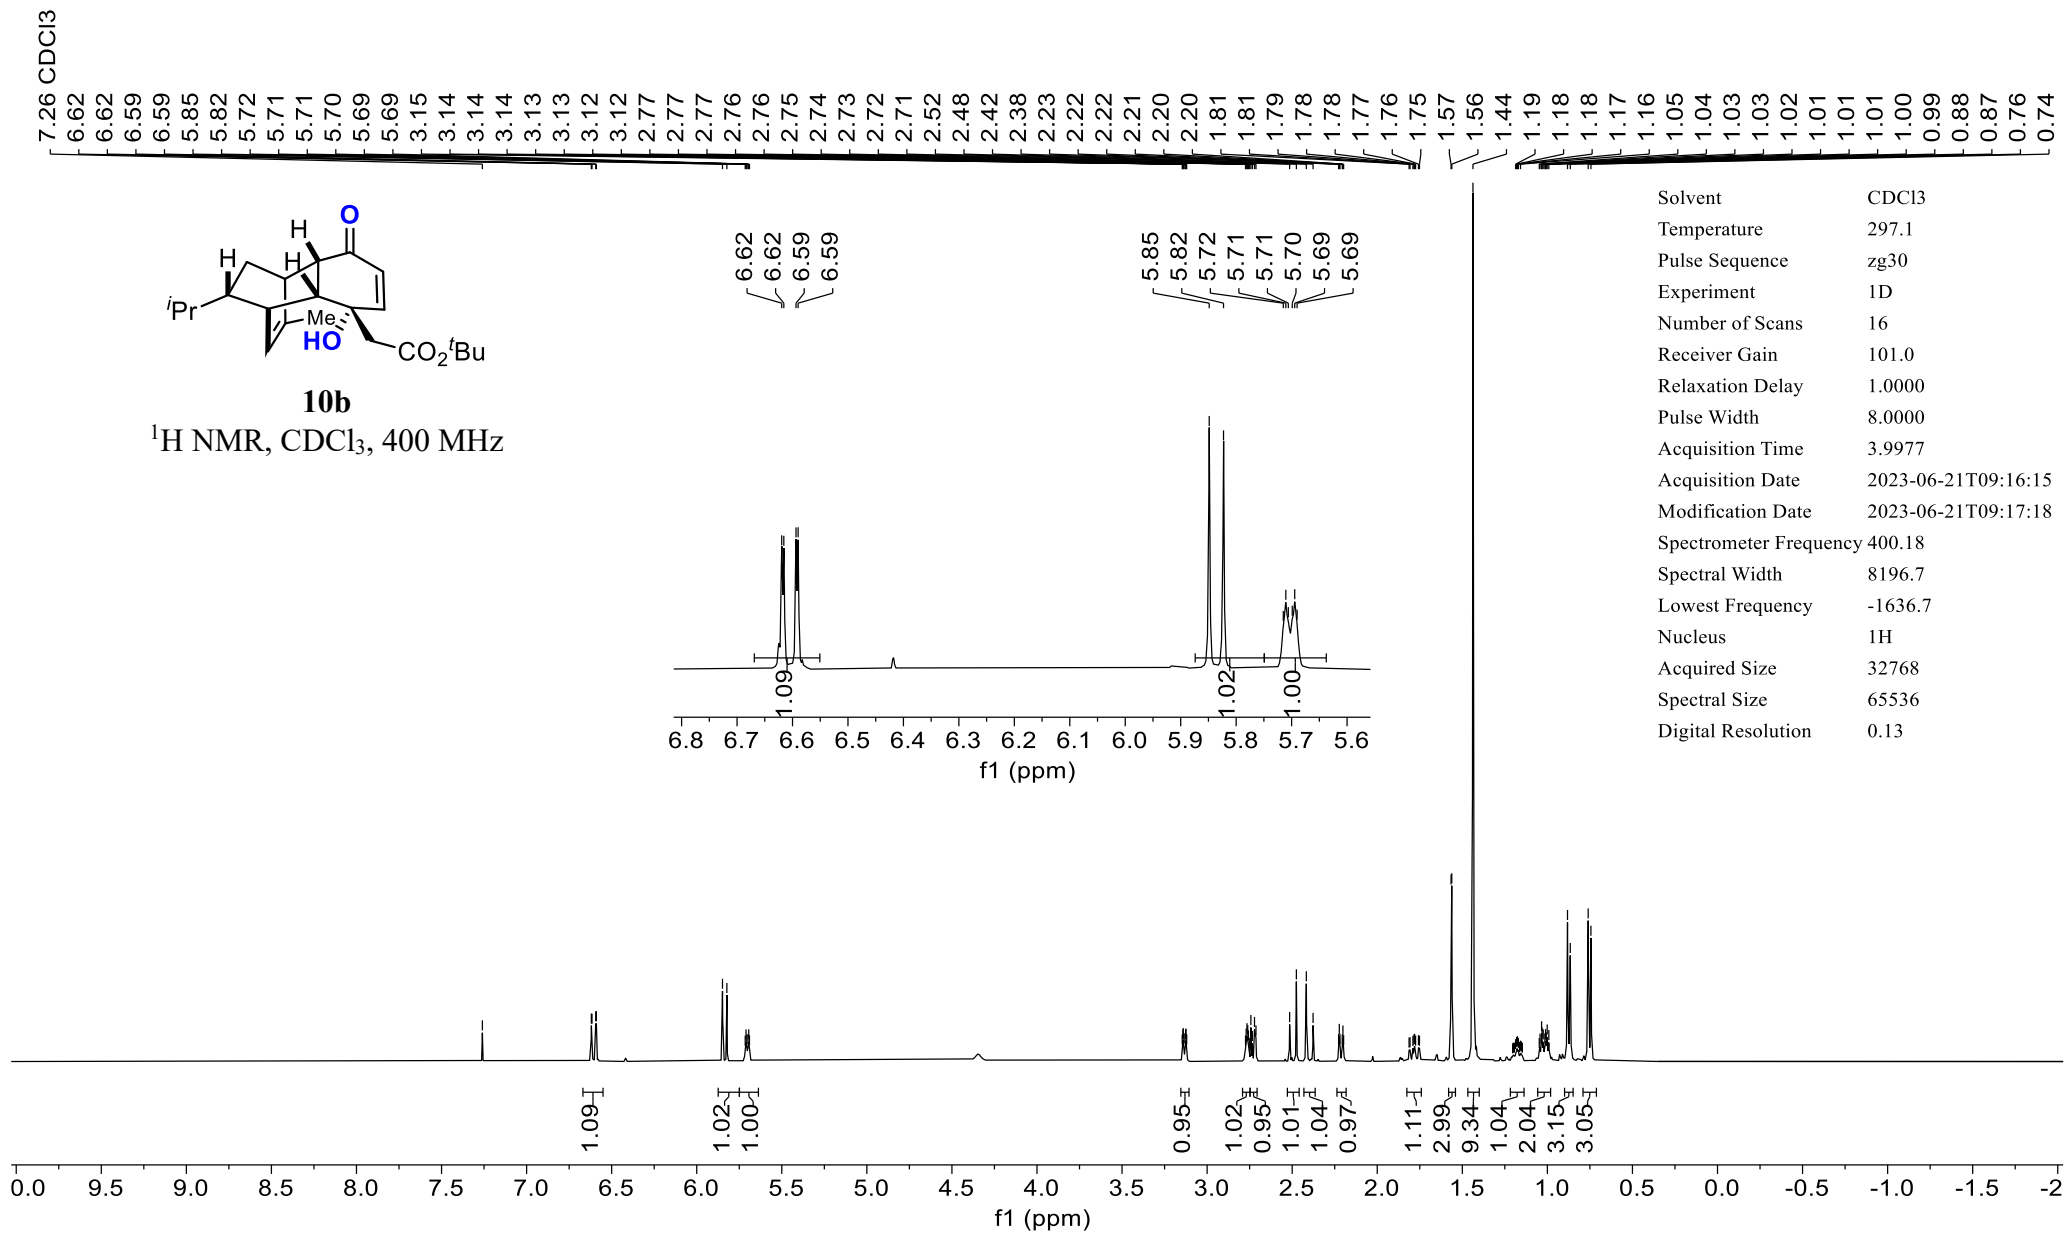

# <sup>13</sup>C NMR of **10b**

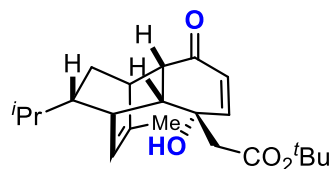

**10b**

<sup>13</sup>C NMR, CDCl<sub>3</sub>, 101 MHz

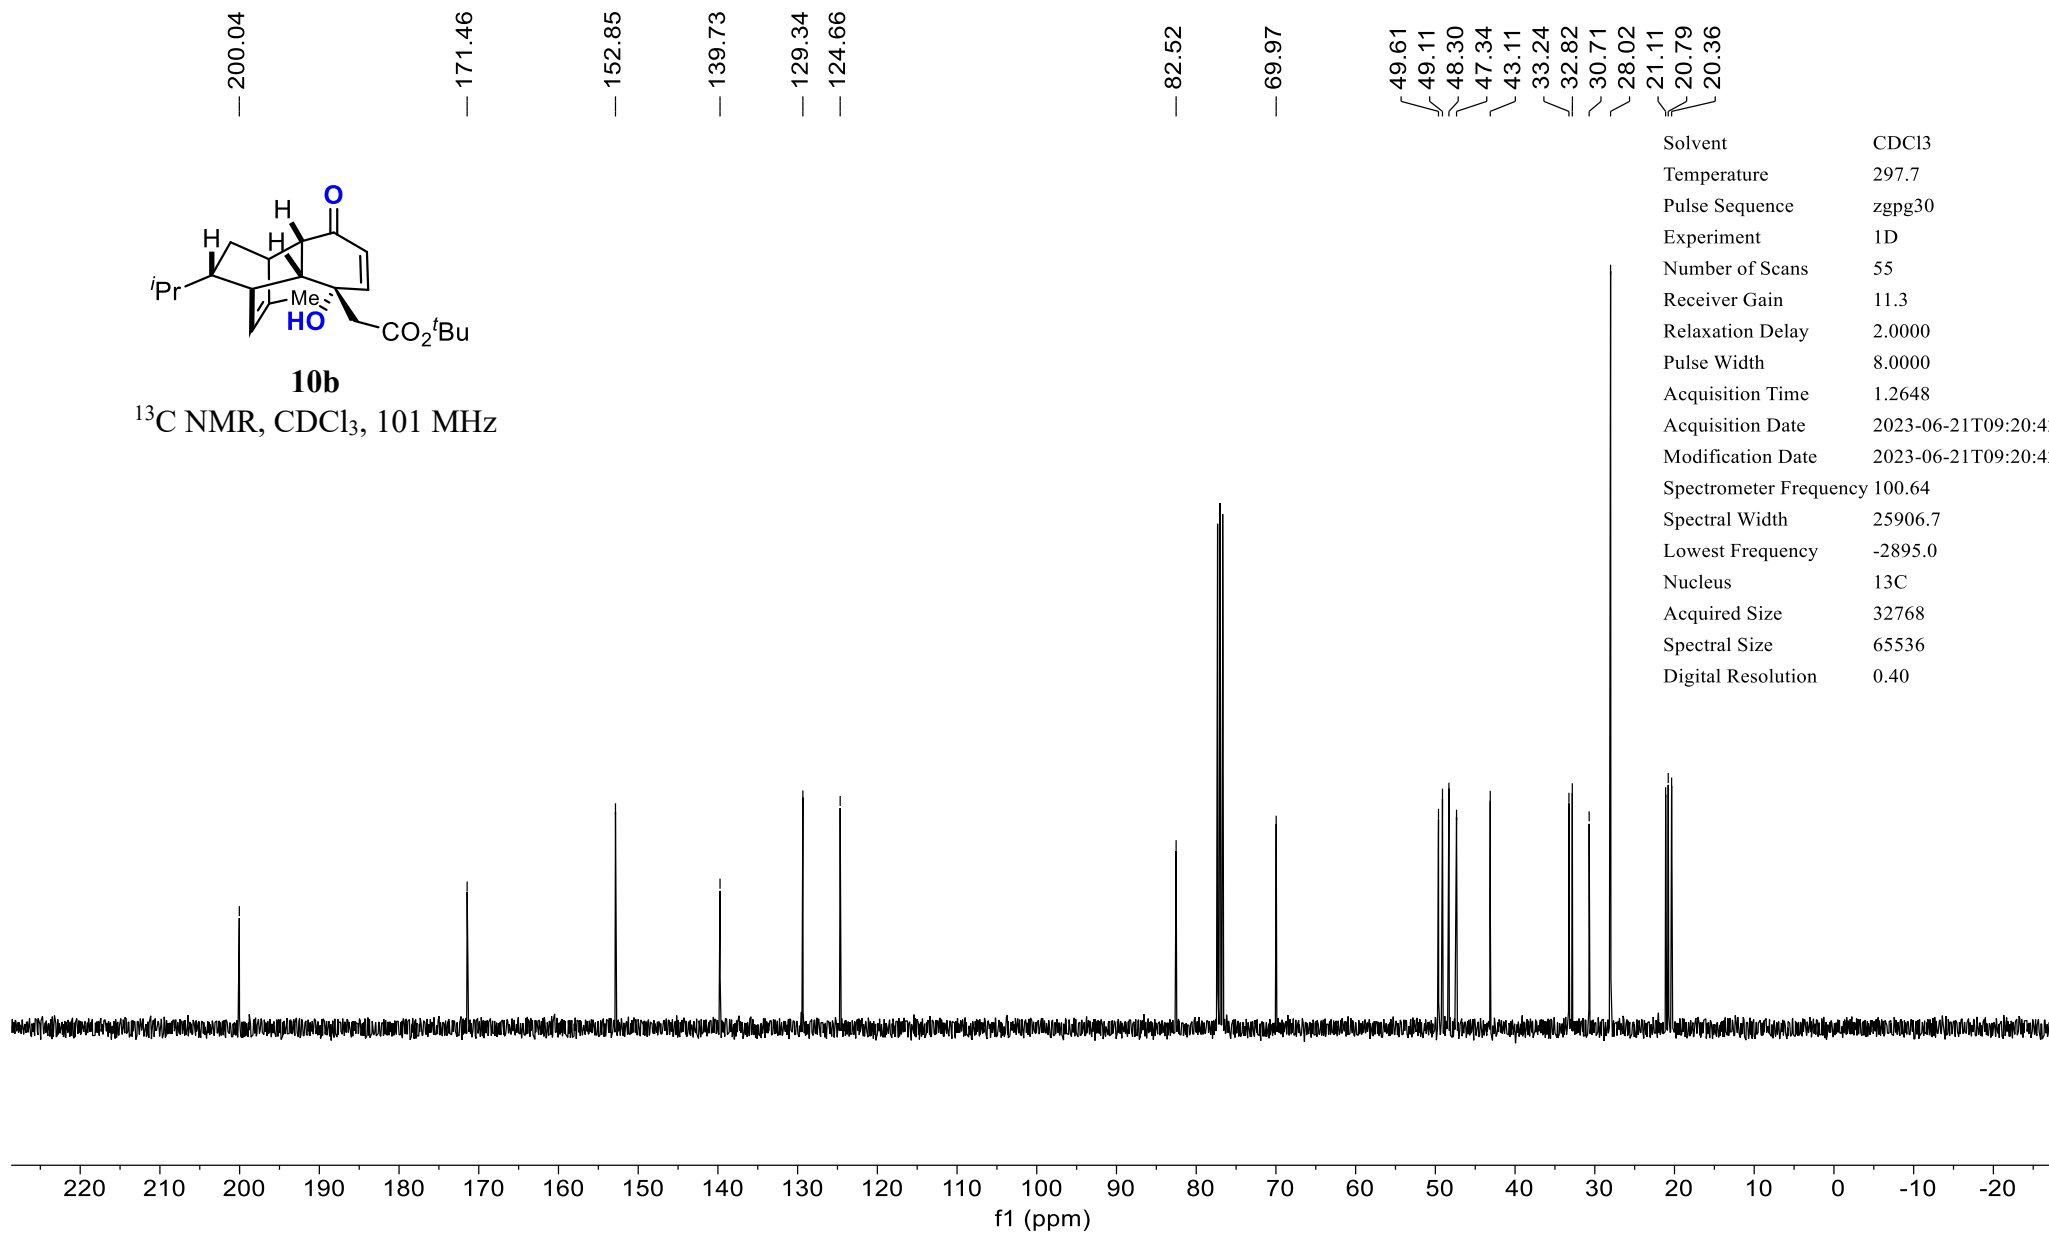

|                        |                     |
|------------------------|---------------------|
| Solvent                | CDCl <sub>3</sub>   |
| Temperature            | 297.7               |
| Pulse Sequence         | zgpg30              |
| Experiment             | 1D                  |
| Number of Scans        | 55                  |
| Receiver Gain          | 11.3                |
| Relaxation Delay       | 2.0000              |
| Pulse Width            | 8.0000              |
| Acquisition Time       | 1.2648              |
| Acquisition Date       | 2023-06-21T09:20:42 |
| Modification Date      | 2023-06-21T09:20:42 |
| Spectrometer Frequency | 100.64              |
| Spectral Width         | 25906.7             |
| Lowest Frequency       | -2895.0             |
| Nucleus                | <sup>13</sup> C     |
| Acquired Size          | 32768               |
| Spectral Size          | 65536               |
| Digital Resolution     | 0.40                |

<sup>1</sup>H NMR of 9b

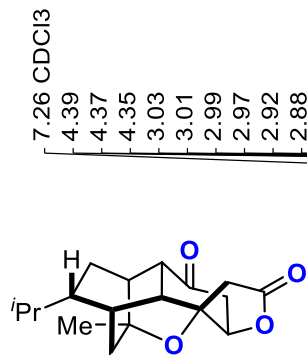

9b

<sup>1</sup>H NMR, CDCl<sub>3</sub>, 400 MHz

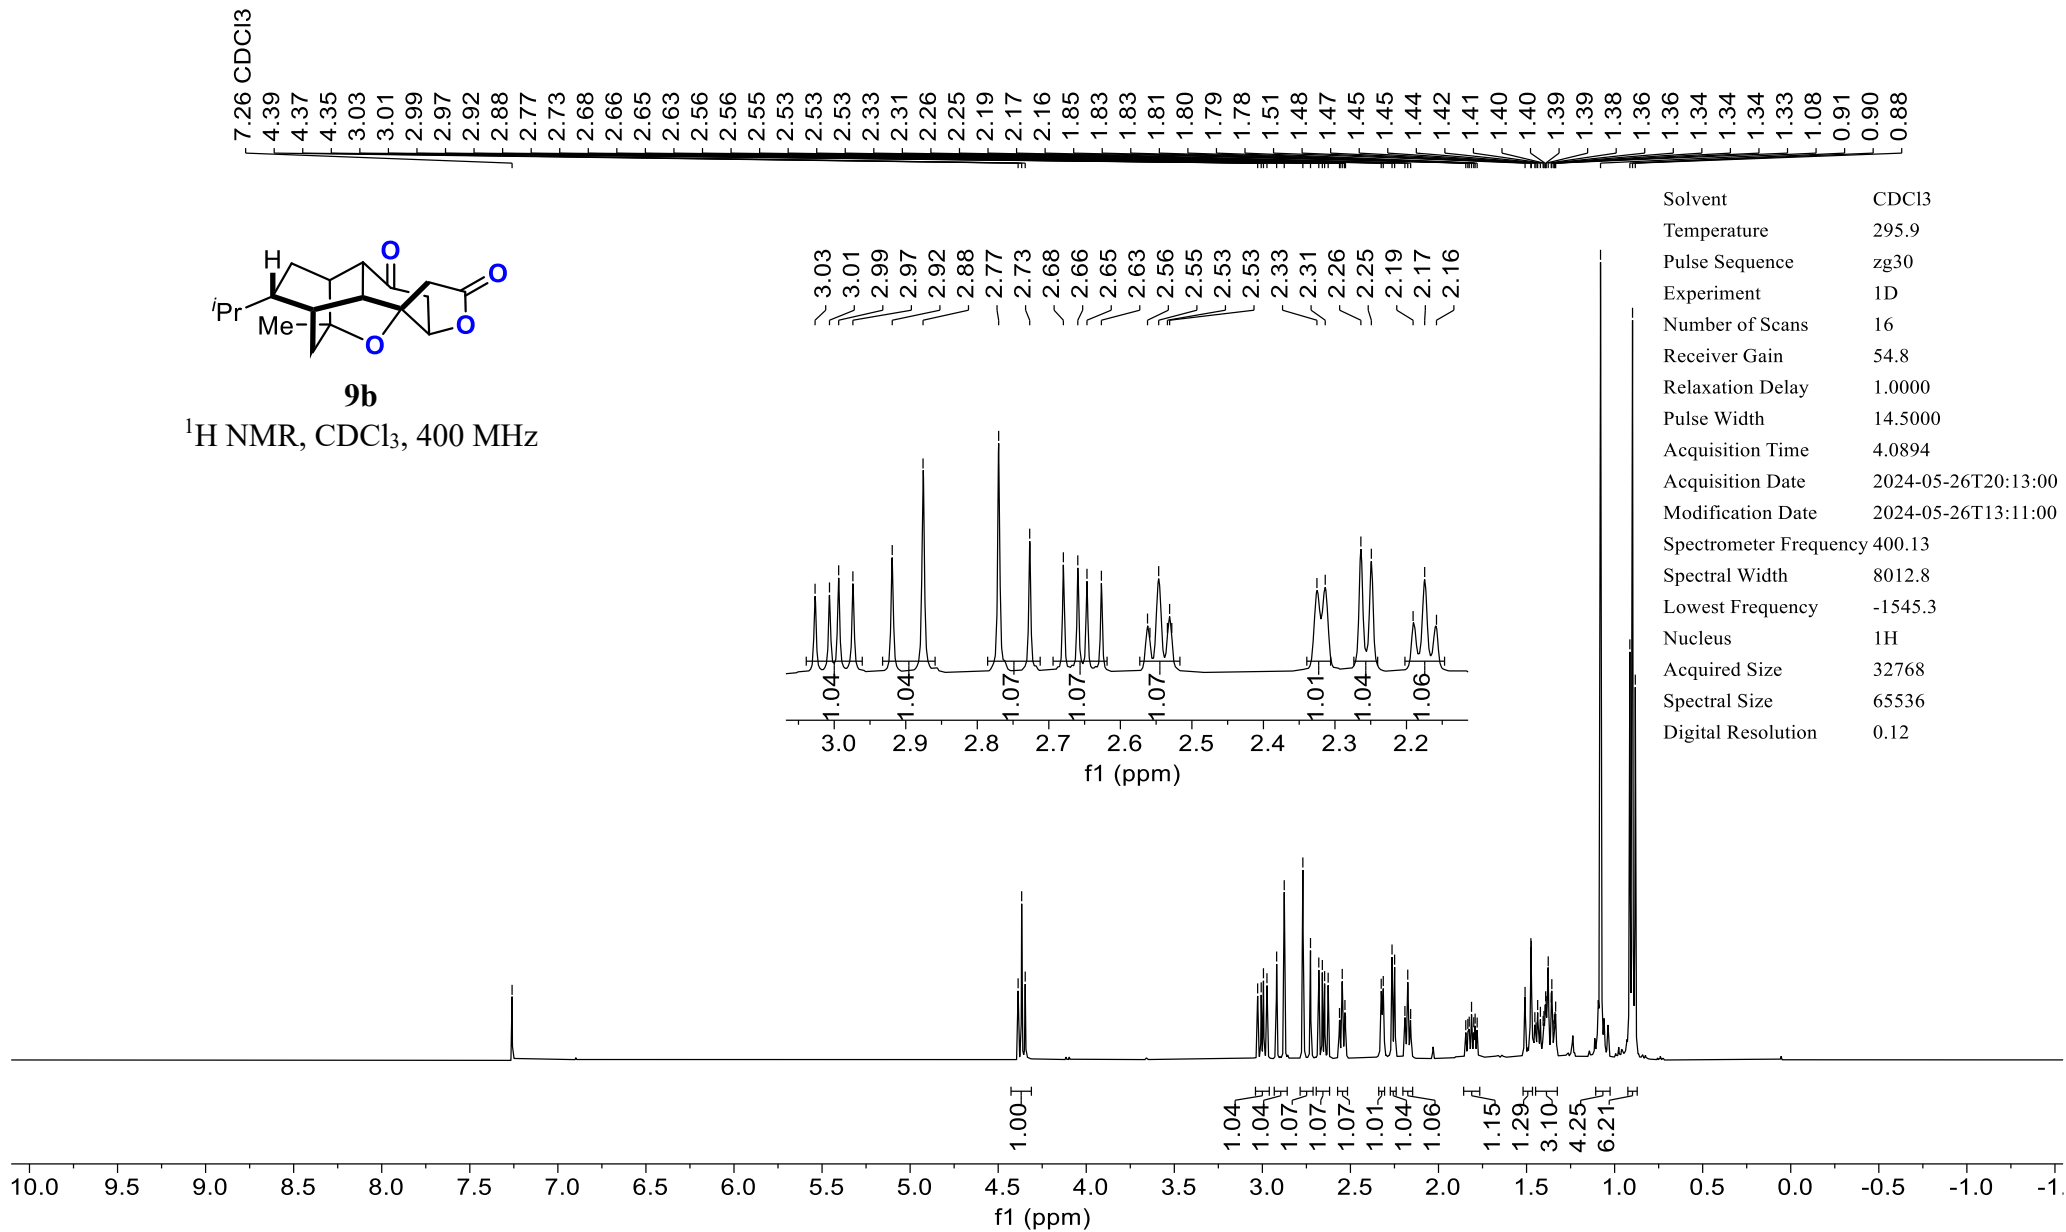



# <sup>13</sup>C NMR of **9b**

— 208.47 —  
— 173.32 —

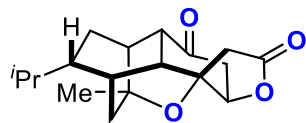

**9b**

<sup>13</sup>C NMR, CDCl<sub>3</sub>, 101 MHz

81.05  
78.42  
76.11  
45.75  
42.17  
41.90  
41.35  
40.17  
35.05  
31.59  
29.51  
29.47  
27.03  
23.46  
21.52  
20.23

|                        |                     |
|------------------------|---------------------|
| Solvent                | CDCl <sub>3</sub>   |
| Temperature            | 296.5               |
| Pulse Sequence         | zgpg30              |
| Experiment             | 1D                  |
| Number of Scans        | 104                 |
| Receiver Gain          | 196.9               |
| Relaxation Delay       | 2.0000              |
| Pulse Width            | 9.7000              |
| Acquisition Time       | 1.2583              |
| Acquisition Date       | 2024-05-26T20:16:00 |
| Modification Date      | 2024-05-26T13:11:00 |
| Spectrometer Frequency | 100.62              |
| Spectral Width         | 26041.7             |
| Lowest Frequency       | -2965.0             |
| Nucleus                | <sup>13</sup> C     |
| Acquired Size          | 32768               |
| Spectral Size          | 65536               |
| Digital Resolution     | 0.40                |

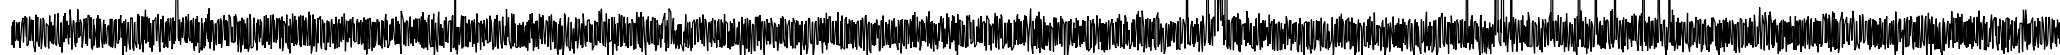

220 210 200 190 180 170 160 150 140 130 120 110 100 90 80 70 60 50 40 30 20 10 0 -10 -20

f1 (ppm)

60

# <sup>1</sup>H NMR of 15b

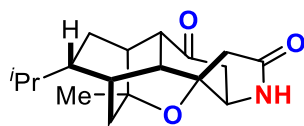

**15b**

<sup>1</sup>H NMR, CDCl<sub>3</sub>, 400 MHz

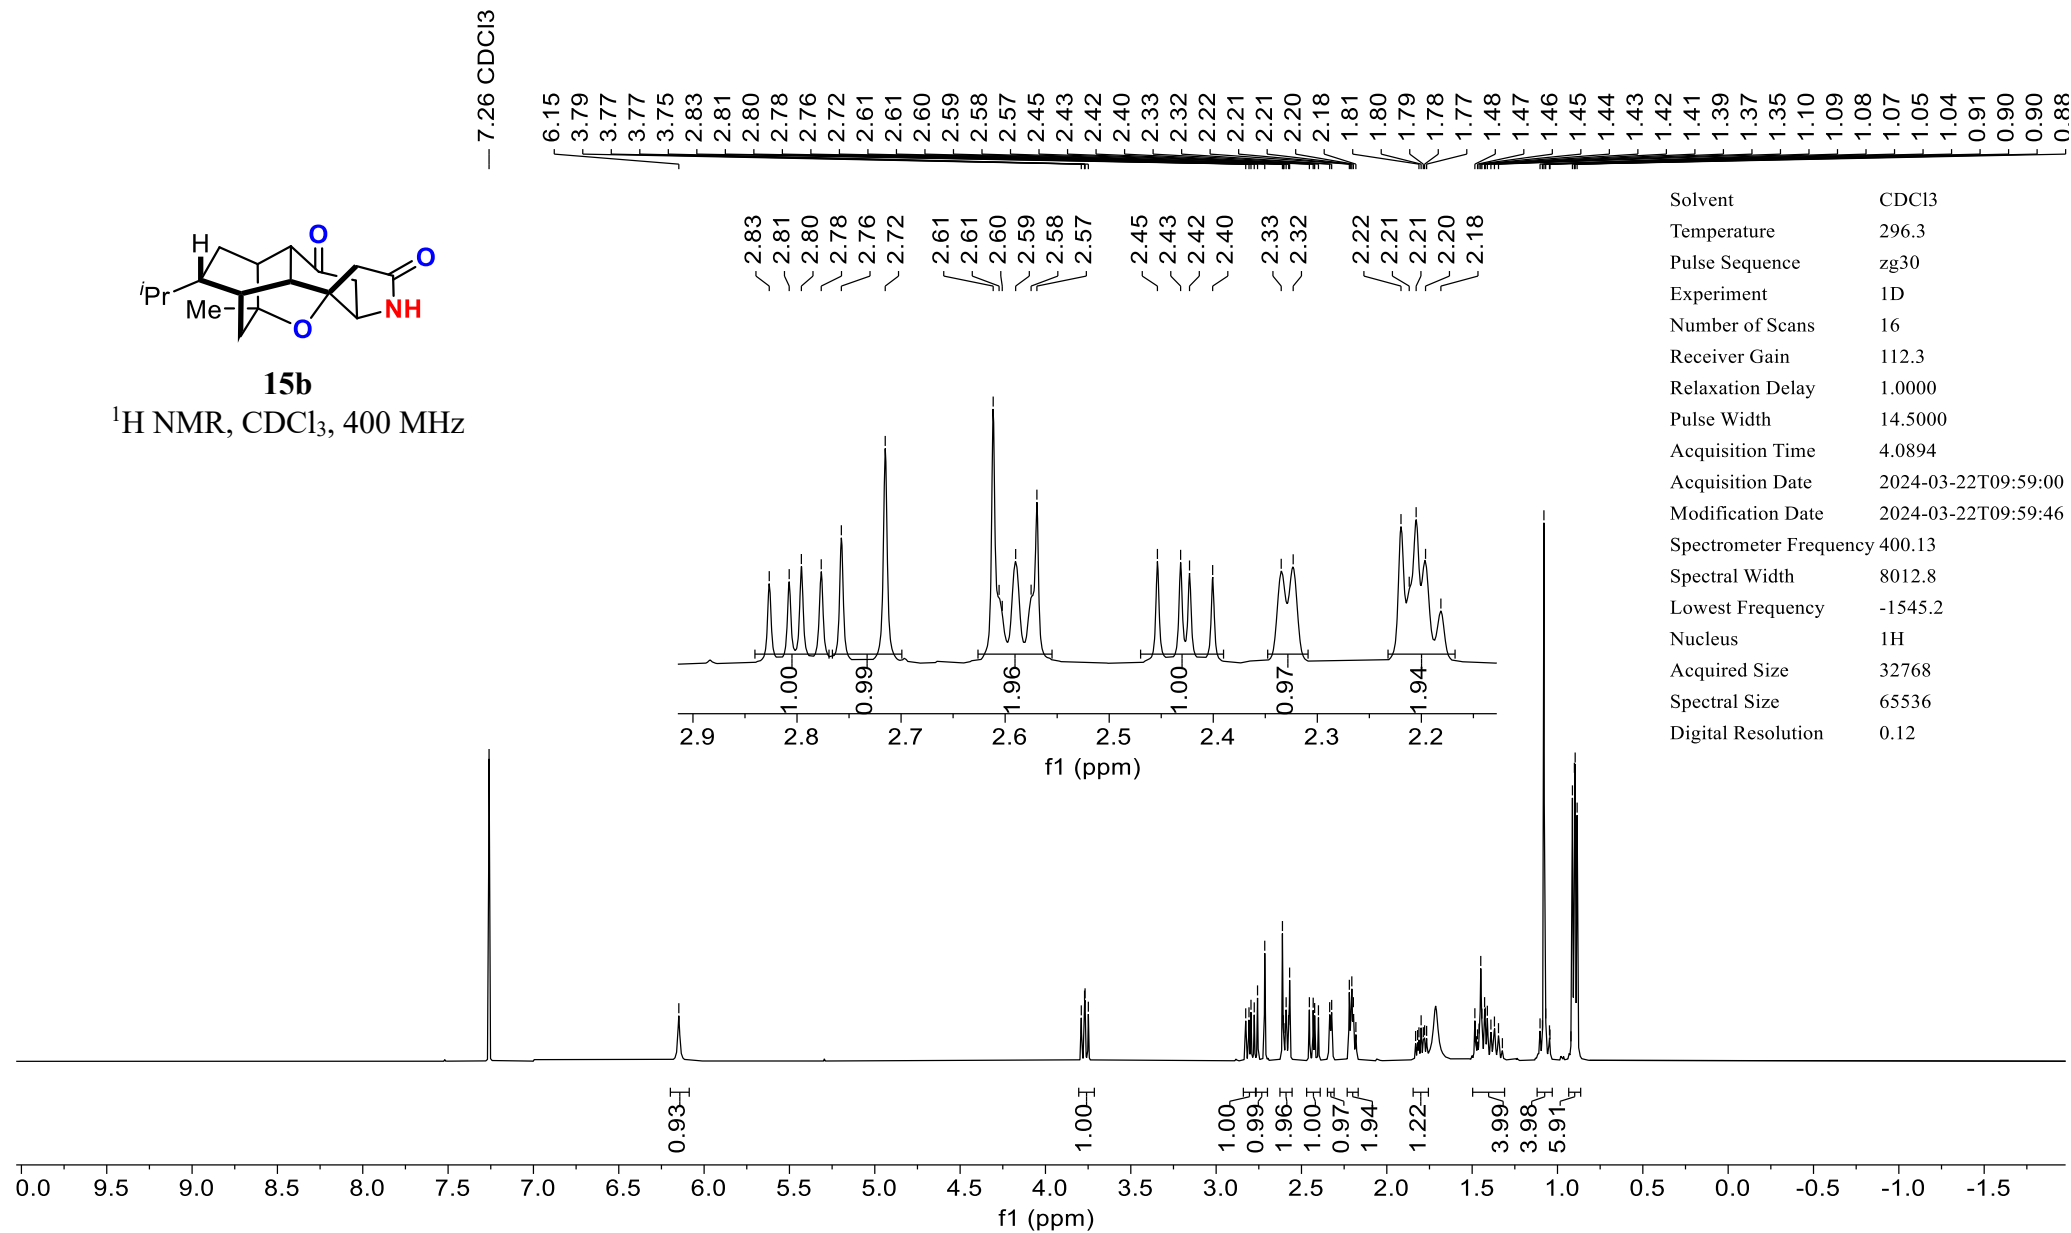

|                        |                     |
|------------------------|---------------------|
| Solvent                | CDCl <sub>3</sub>   |
| Temperature            | 296.3               |
| Pulse Sequence         | zg30                |
| Experiment             | 1D                  |
| Number of Scans        | 16                  |
| Receiver Gain          | 112.3               |
| Relaxation Delay       | 1.0000              |
| Pulse Width            | 14.5000             |
| Acquisition Time       | 4.0894              |
| Acquisition Date       | 2024-03-22T09:59:00 |
| Modification Date      | 2024-03-22T09:59:46 |
| Spectrometer Frequency | 400.13              |
| Spectral Width         | 8012.8              |
| Lowest Frequency       | -1545.2             |
| Nucleus                | <sup>1</sup> H      |
| Acquired Size          | 32768               |
| Spectral Size          | 65536               |
| Digital Resolution     | 0.12                |

<sup>13</sup>C NMR of **15b**

— 210.18 —  
— 174.58 —

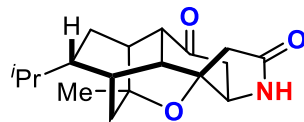

**15b**

<sup>13</sup>C NMR, CDCl<sub>3</sub>, 101 MHz

— 79.29 —  
— 75.73 —  
— 59.86 —  
45.86  
42.71  
42.53  
41.71  
41.52  
35.86  
31.51  
29.60  
29.54  
27.30  
23.64  
21.56  
20.28

|                        |                     |
|------------------------|---------------------|
| Solvent                | CDCl <sub>3</sub>   |
| Temperature            | 296.7               |
| Pulse Sequence         | zgpg30              |
| Experiment             | 1D                  |
| Number of Scans        | 200                 |
| Receiver Gain          | 196.9               |
| Relaxation Delay       | 2.0000              |
| Pulse Width            | 9.7000              |
| Acquisition Time       | 1.2583              |
| Acquisition Date       | 2024-04-10T13:14:00 |
| Modification Date      | 2024-04-10T13:23:42 |
| Spectrometer Frequency | 100.62              |
| Spectral Width         | 26041.7             |
| Lowest Frequency       | -2963.4             |
| Nucleus                | <sup>13</sup> C     |
| Acquired Size          | 32768               |
| Spectral Size          | 65536               |
| Digital Resolution     | 0.40                |

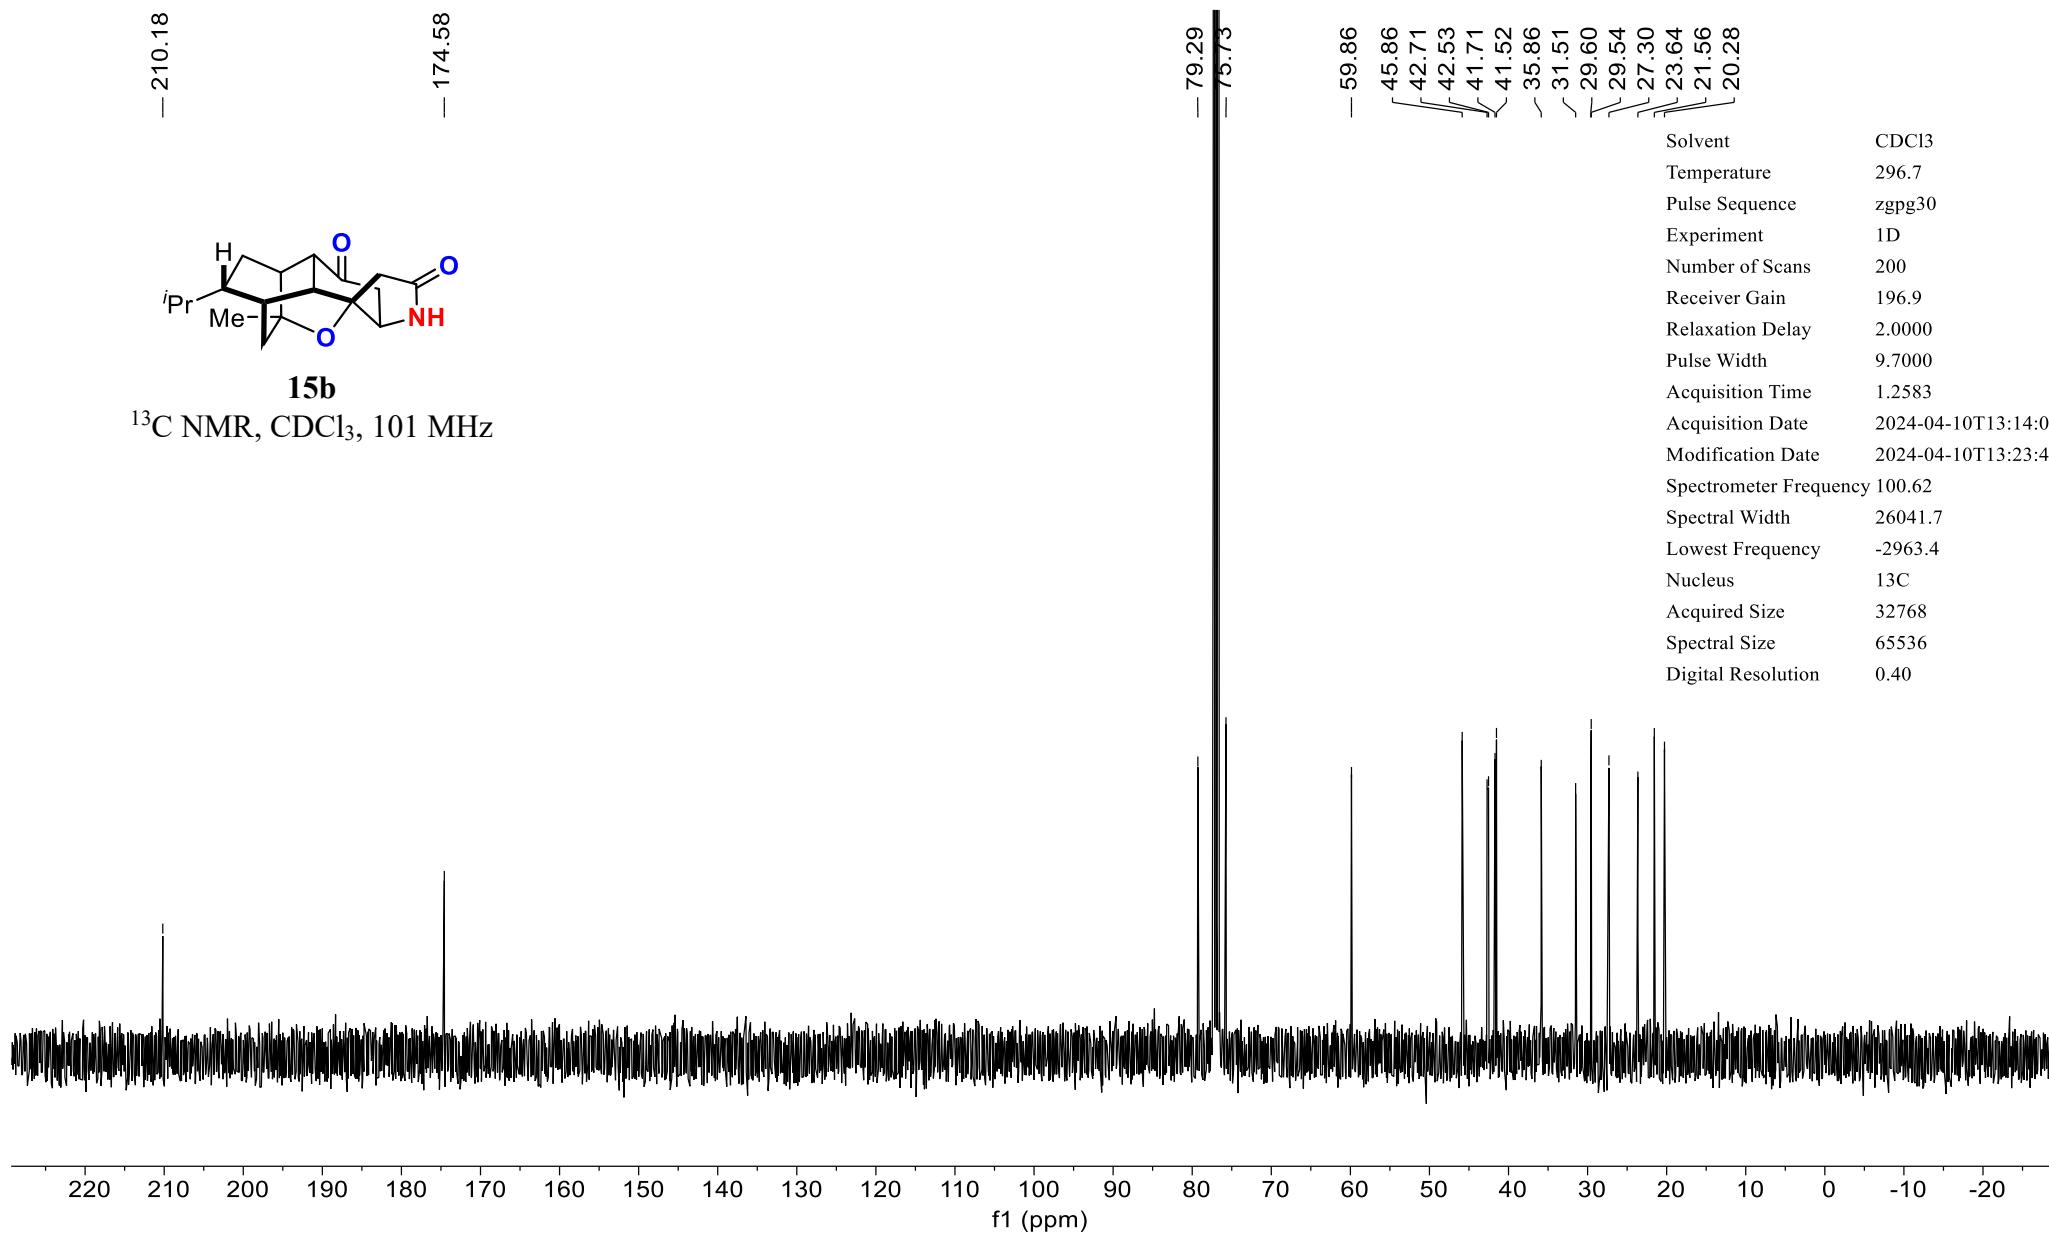

<sup>1</sup>H NMR of Sarglamide E (5)

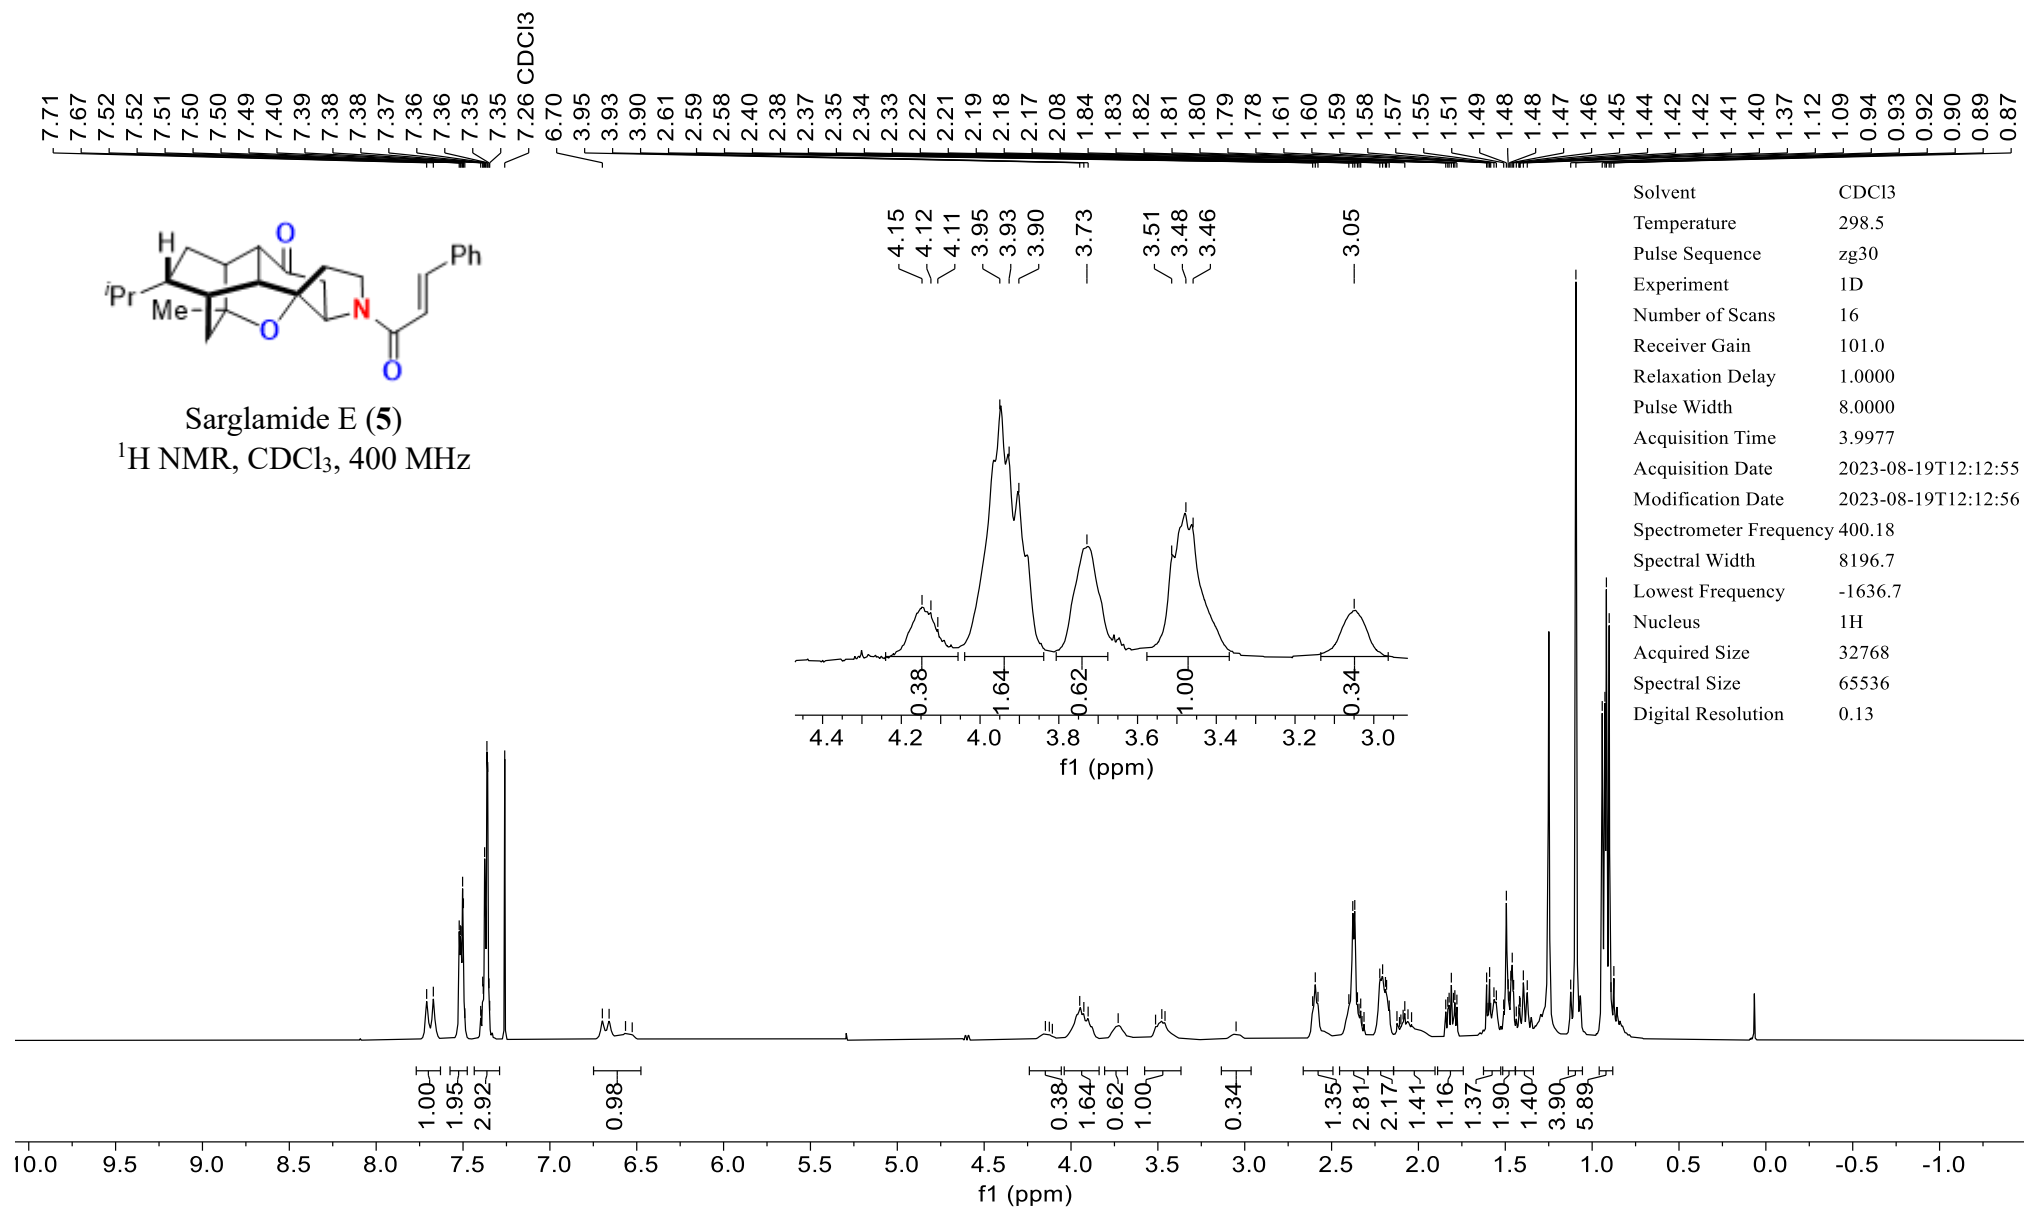

# <sup>13</sup>C NMR of Sarglamide E (5)

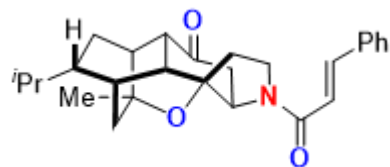

Sarglamide E (5)  
<sup>13</sup>C NMR, CDCl<sub>3</sub>, 101 MHz

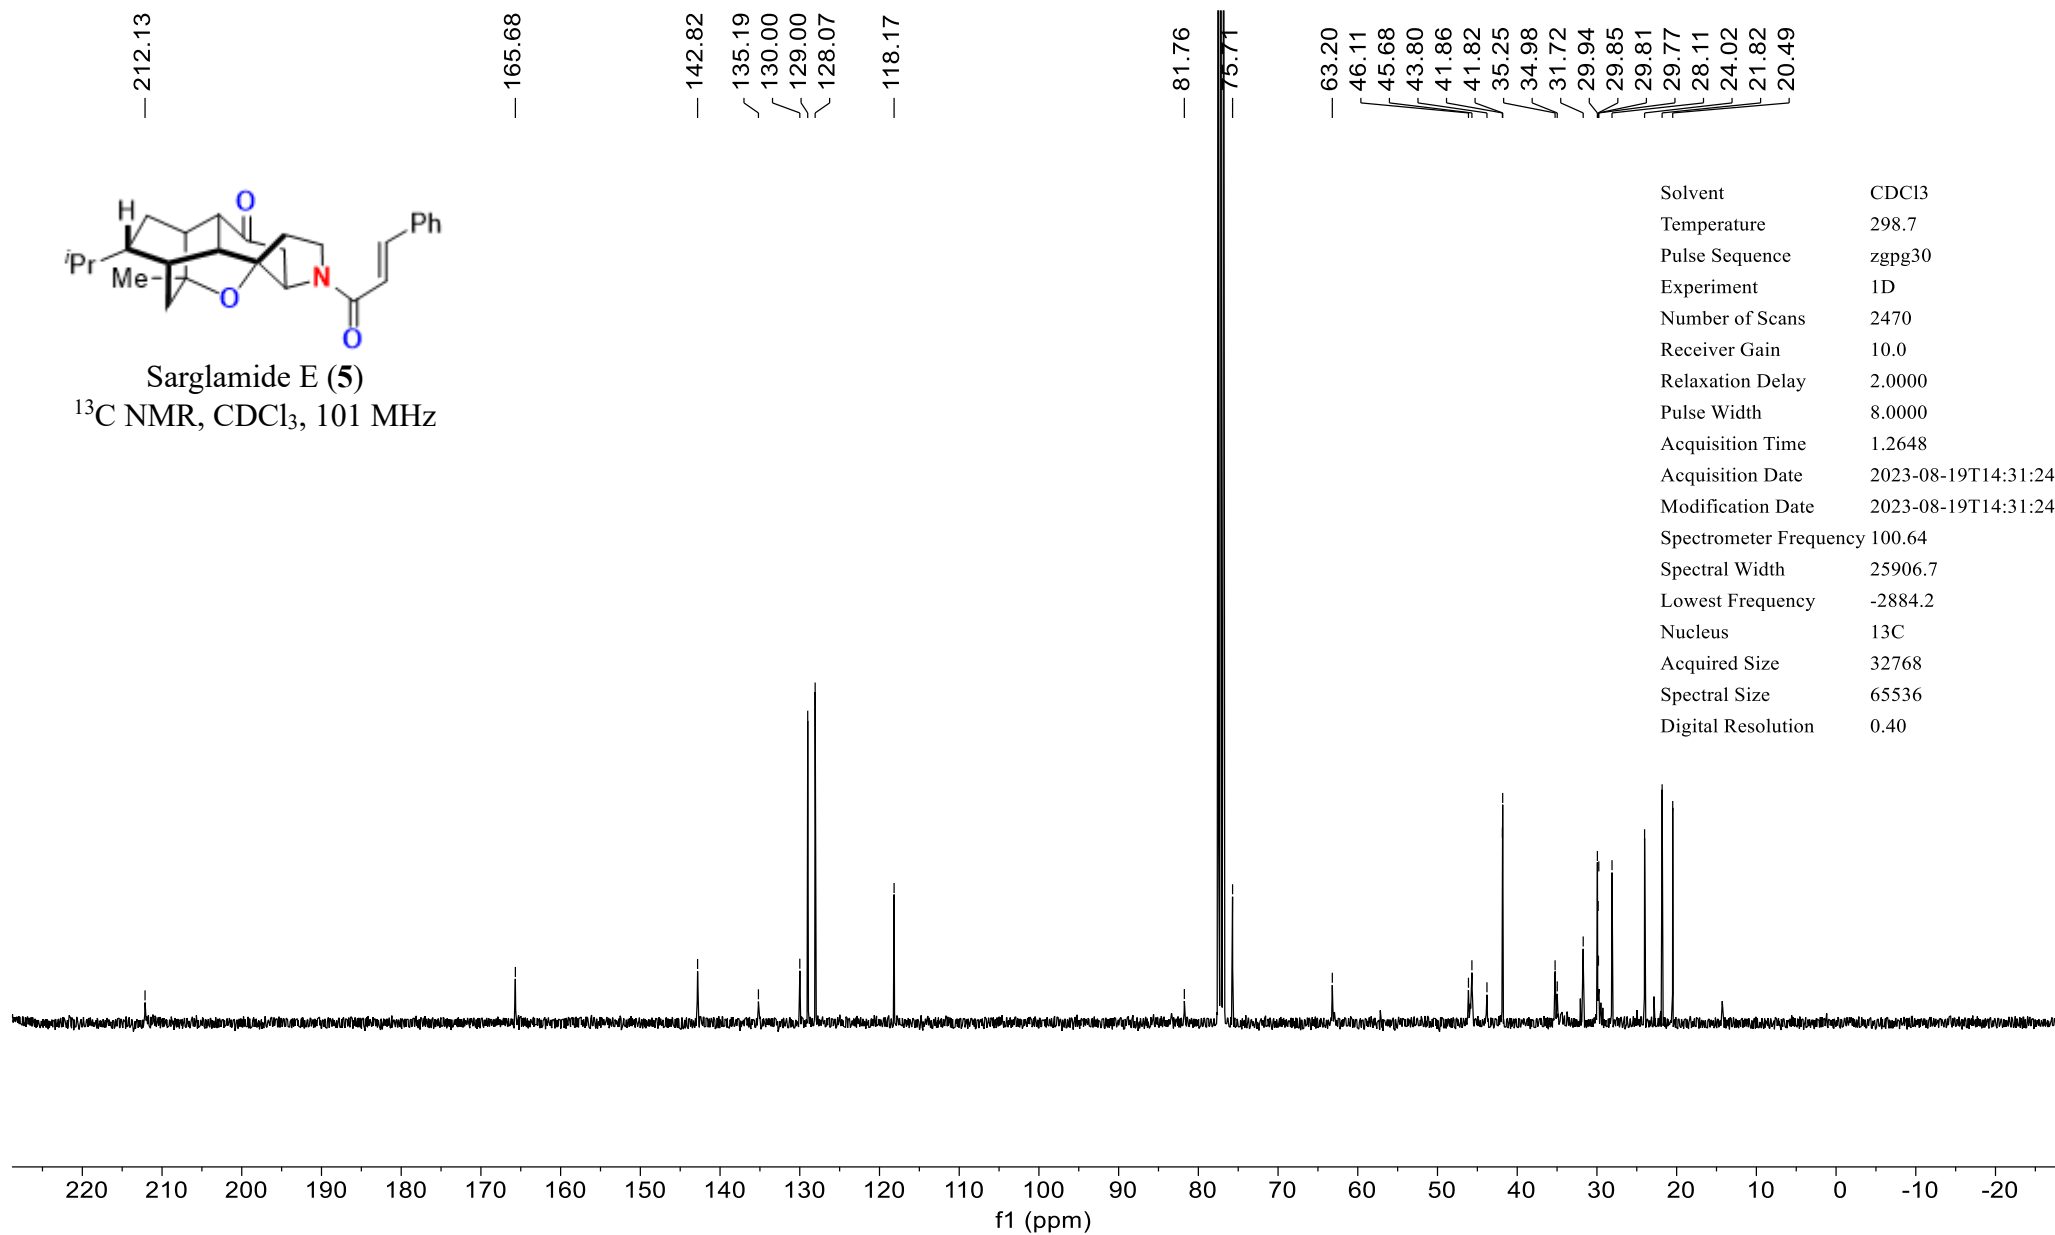

# <sup>1</sup>H NMR of 9a

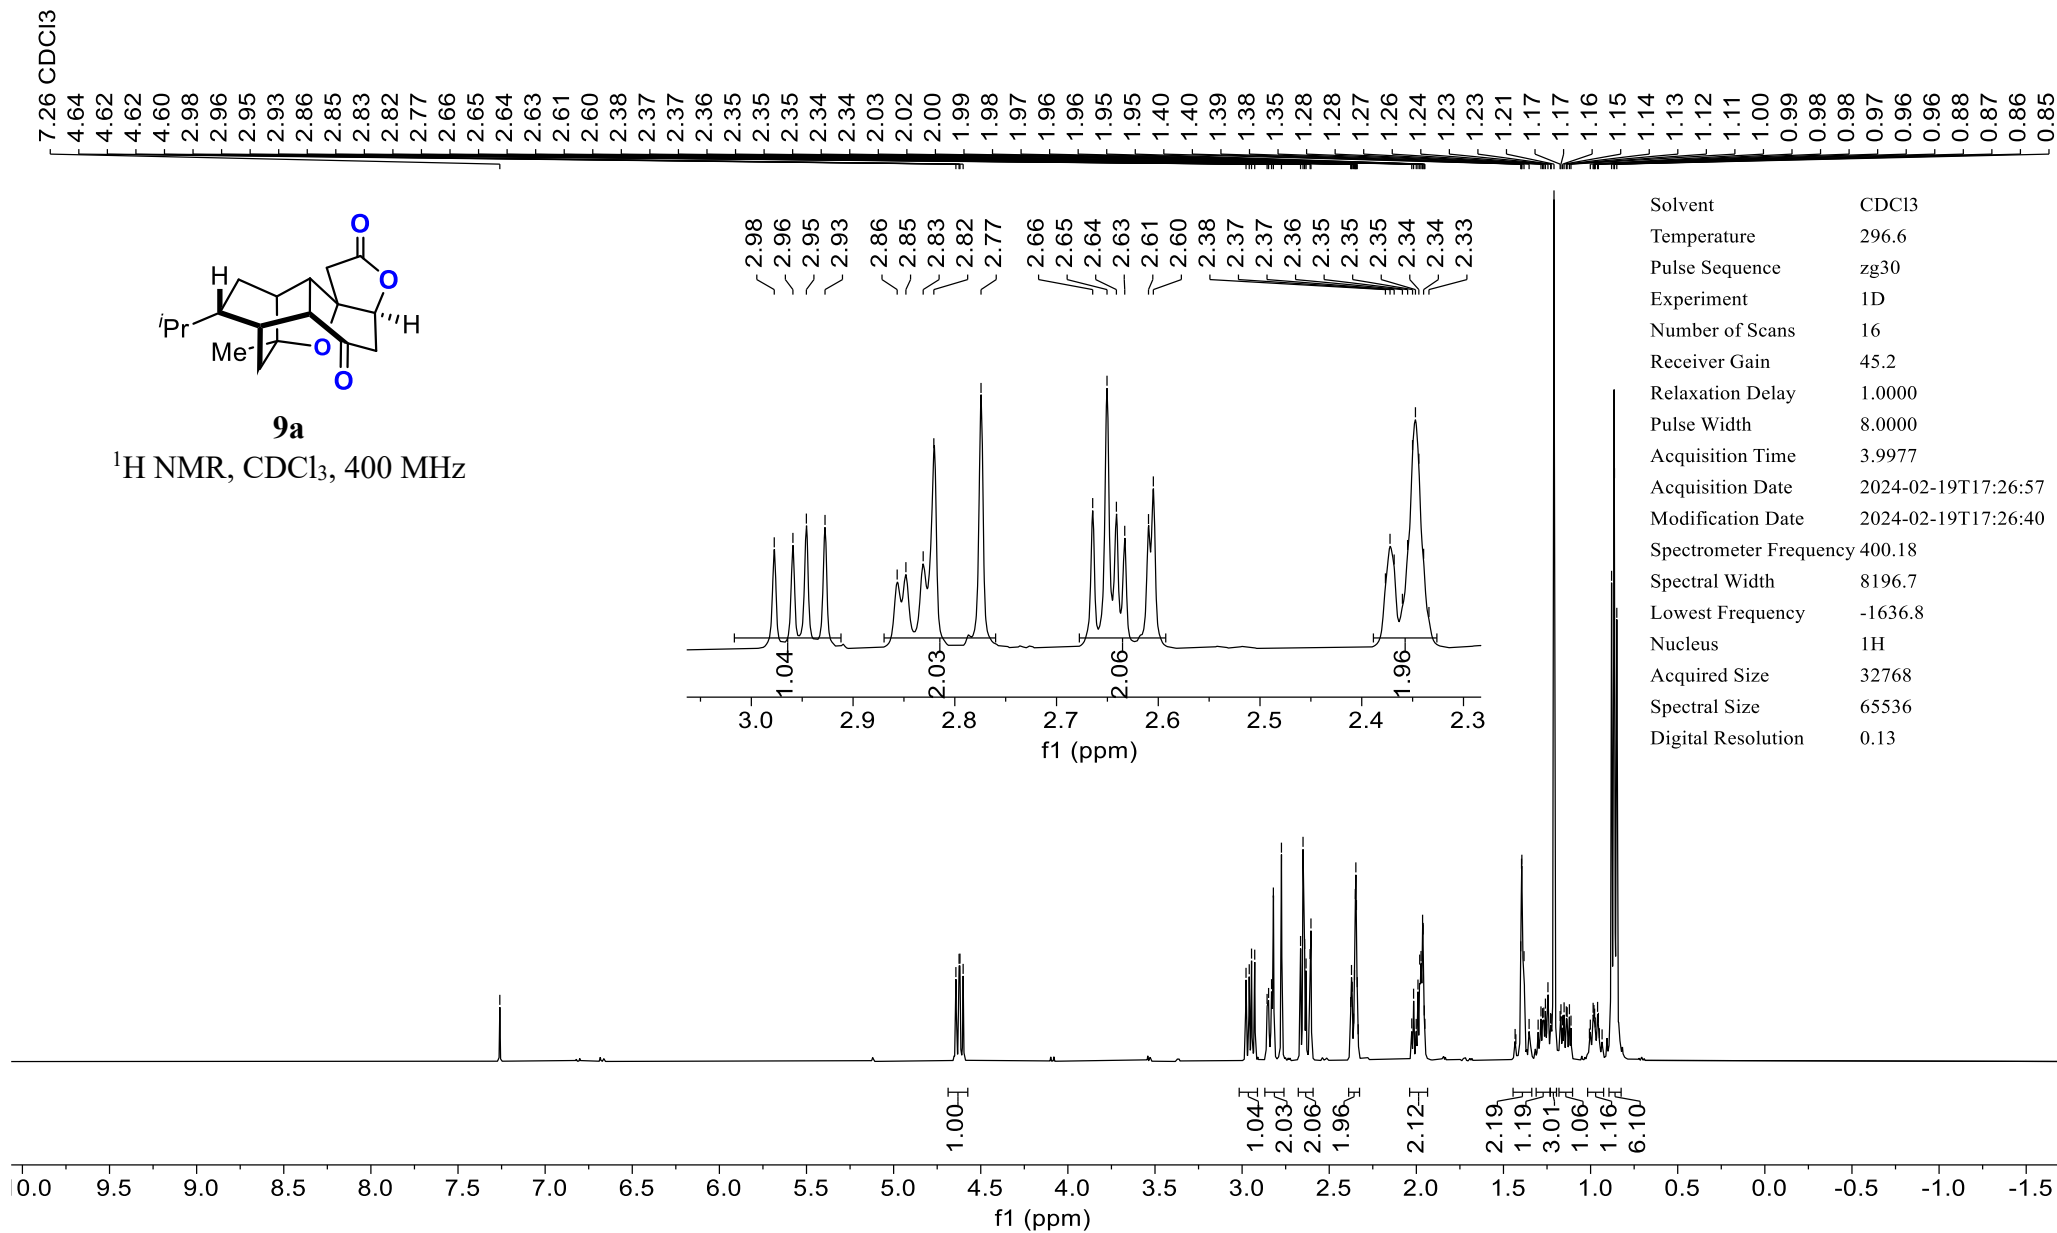

<sup>13</sup>C NMR of **9a**

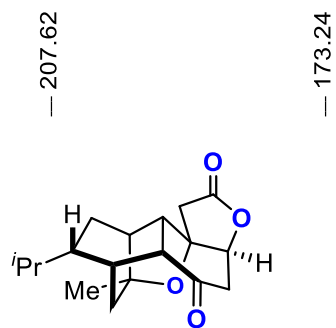

**9a**

<sup>13</sup>C NMR, CDCl<sub>3</sub>, 101 MHz

— 207.62

— 173.24

82.14  
81.41  
81.01

51.28  
45.50  
43.77  
42.74  
42.68  
42.60  
34.25  
32.24  
26.26  
24.51  
23.94  
20.75  
20.61

|                        |                     |
|------------------------|---------------------|
| Solvent                | CDCl <sub>3</sub>   |
| Temperature            | 297.1               |
| Pulse Sequence         | zgpg30              |
| Experiment             | 1D                  |
| Number of Scans        | 30                  |
| Receiver Gain          | 10.0                |
| Relaxation Delay       | 2.0000              |
| Pulse Width            | 8.0000              |
| Acquisition Time       | 1.2648              |
| Acquisition Date       | 2024-02-19T17:33:34 |
| Modification Date      | 2024-02-19T17:33:18 |
| Spectrometer Frequency | 100.64              |
| Spectral Width         | 25906.7             |
| Lowest Frequency       | -2899.8             |
| Nucleus                | 13C                 |
| Acquired Size          | 32768               |
| Spectral Size          | 65536               |
| Digital Resolution     | 0.40                |

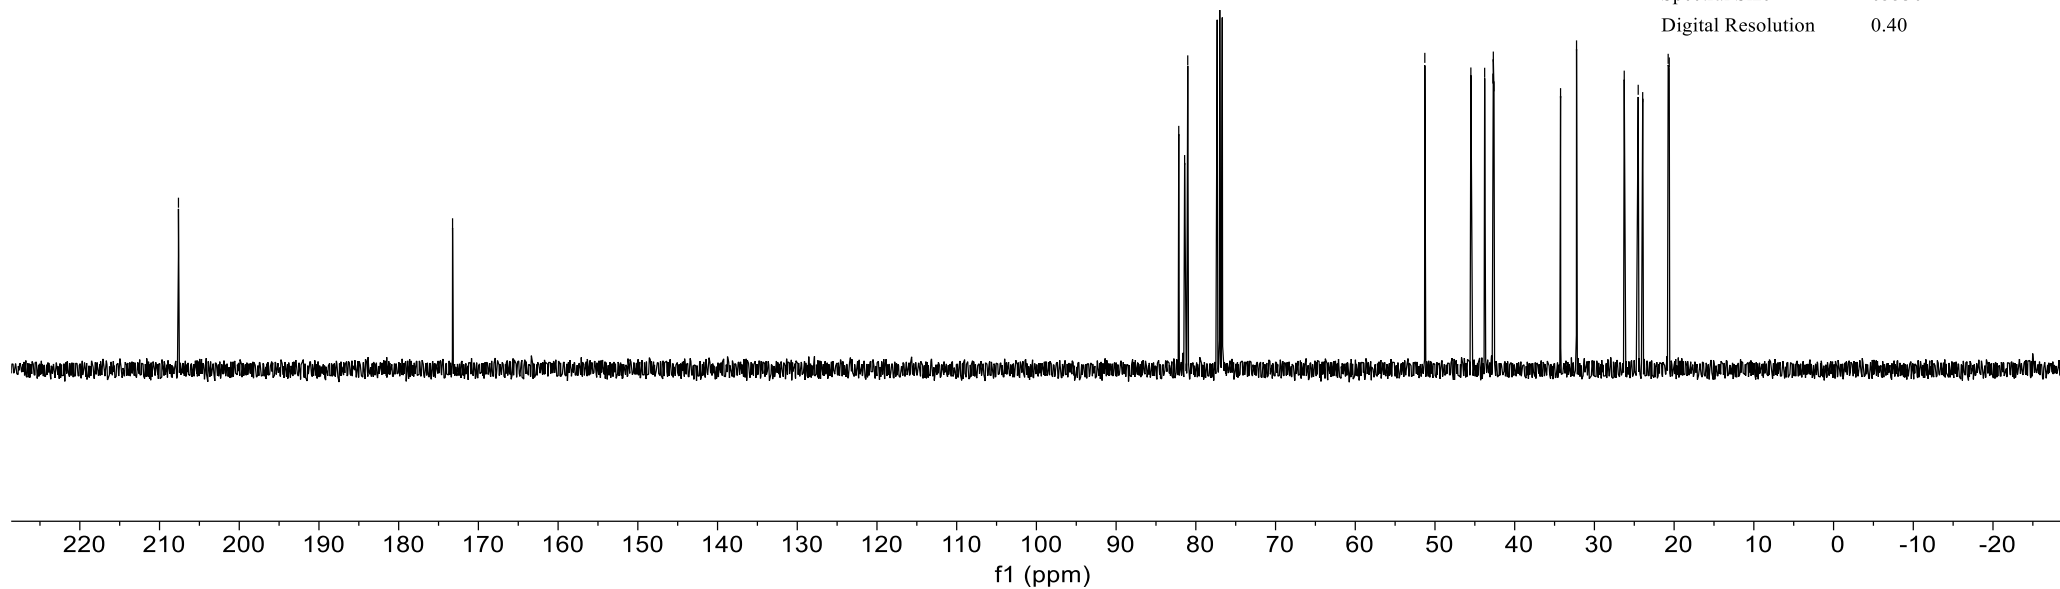

# <sup>1</sup>H NMR of 15a

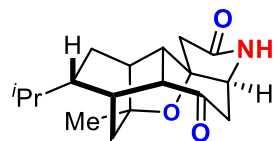

**15a**

<sup>1</sup>H NMR, CDCl<sub>3</sub>, 400 MHz

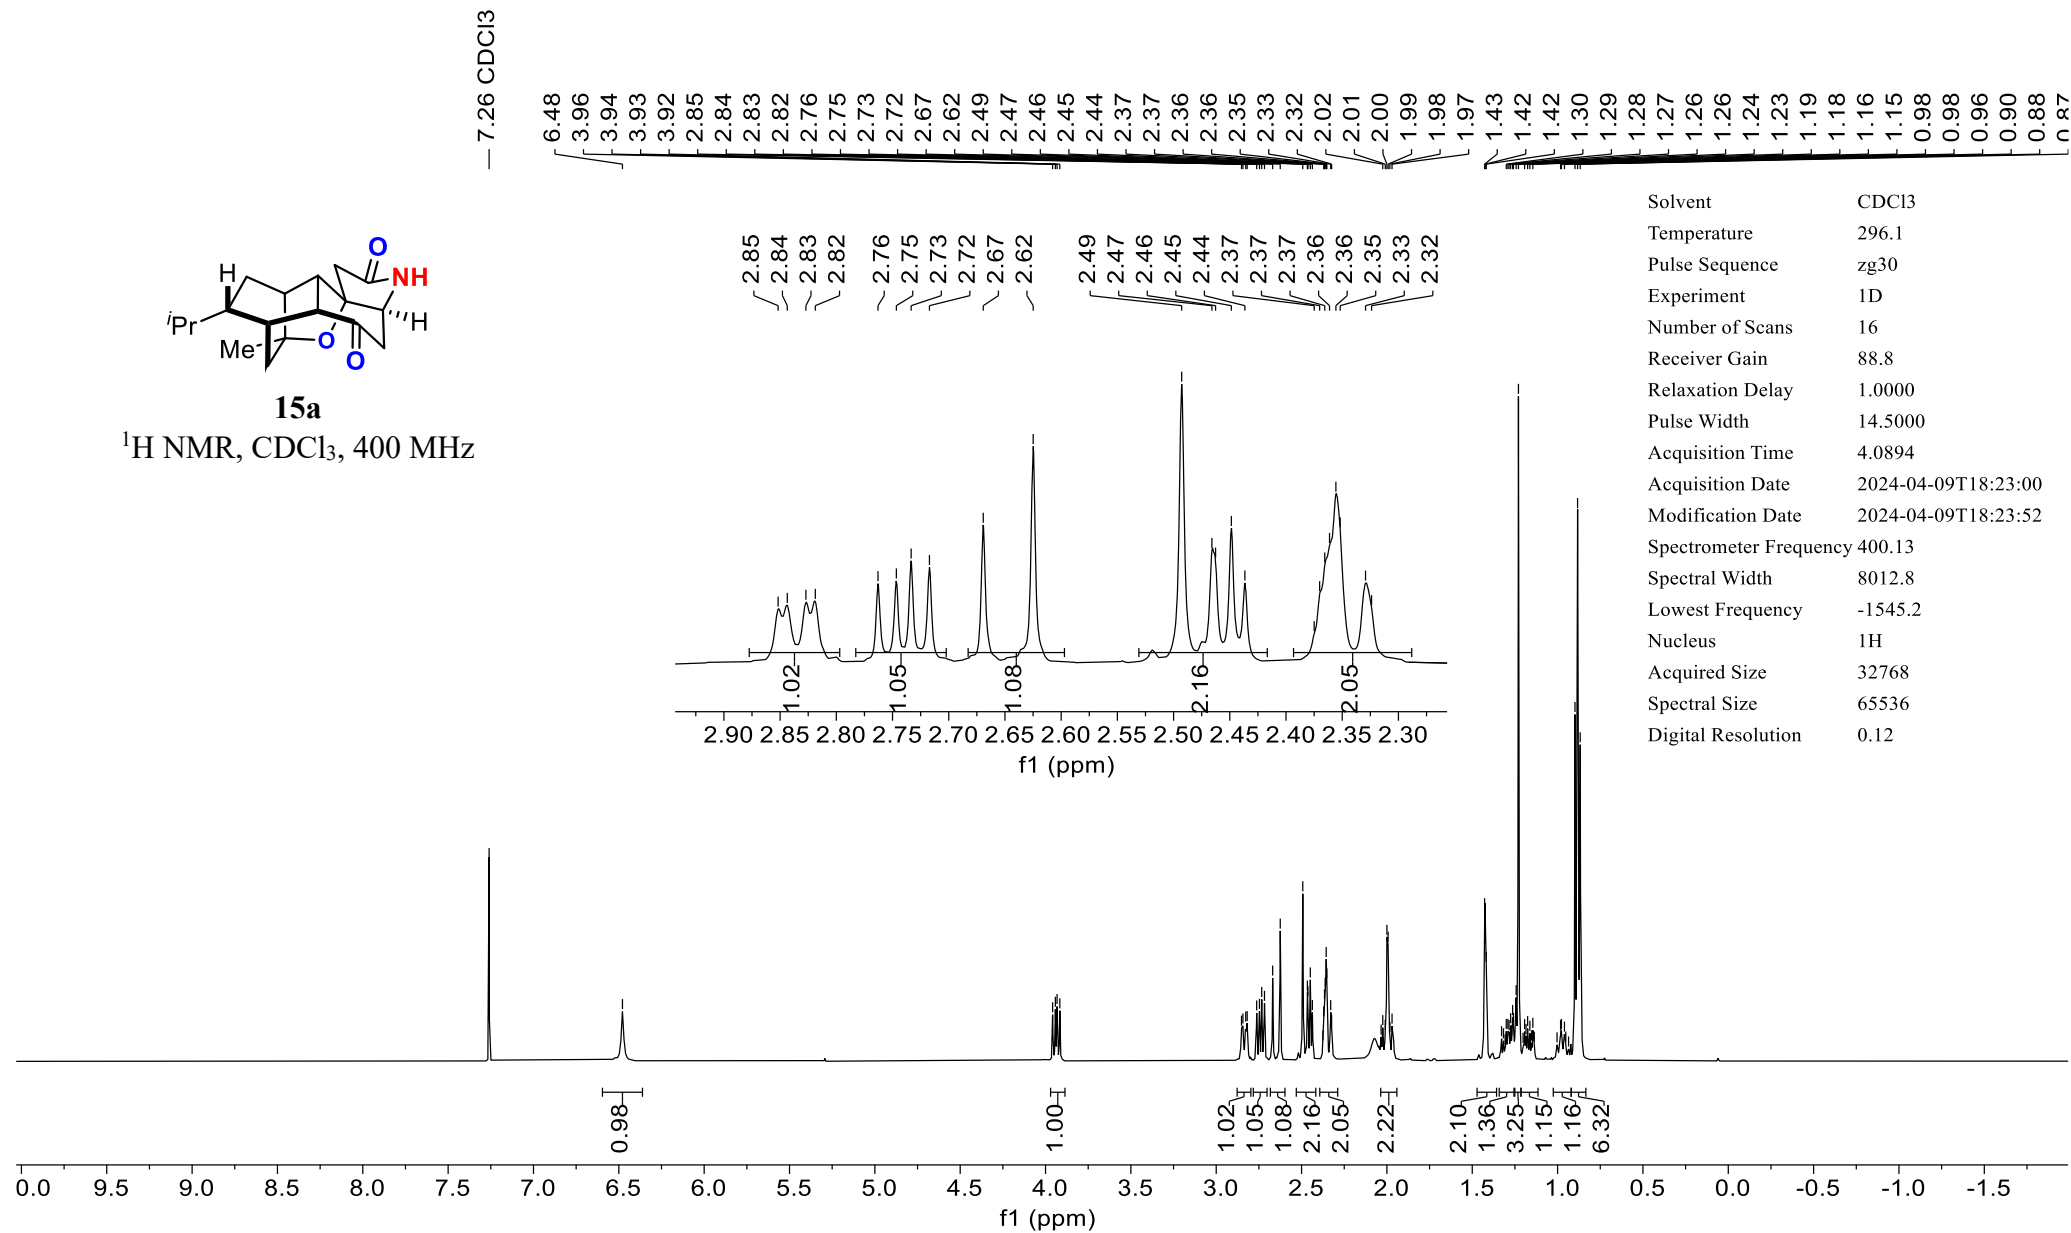



# <sup>13</sup>C NMR of **15a**

— 209.01  
— 174.24

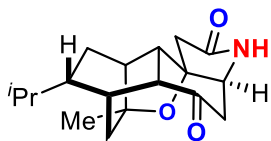

**15a**

<sup>13</sup>C NMR, CDCl<sub>3</sub>, 101 MHz

— 81.78

59.39  
51.84  
46.91  
45.49  
44.04  
43.92  
42.57  
34.59  
32.38  
26.28  
24.73  
24.11  
20.81  
20.73

|                        |                     |
|------------------------|---------------------|
| Solvent                | CDCl <sub>3</sub>   |
| Temperature            | 296.9               |
| Pulse Sequence         | zgpg30              |
| Experiment             | 1D                  |
| Number of Scans        | 228                 |
| Receiver Gain          | 196.9               |
| Relaxation Delay       | 2.0000              |
| Pulse Width            | 9.7000              |
| Acquisition Time       | 1.2583              |
| Acquisition Date       | 2024-04-09T18:27:00 |
| Modification Date      | 2024-04-09T18:37:24 |
| Spectrometer Frequency | 100.62              |
| Spectral Width         | 26041.7             |
| Lowest Frequency       | -2963.0             |
| Nucleus                | 13C                 |
| Acquired Size          | 32768               |
| Spectral Size          | 65536               |
| Digital Resolution     | 0.40                |

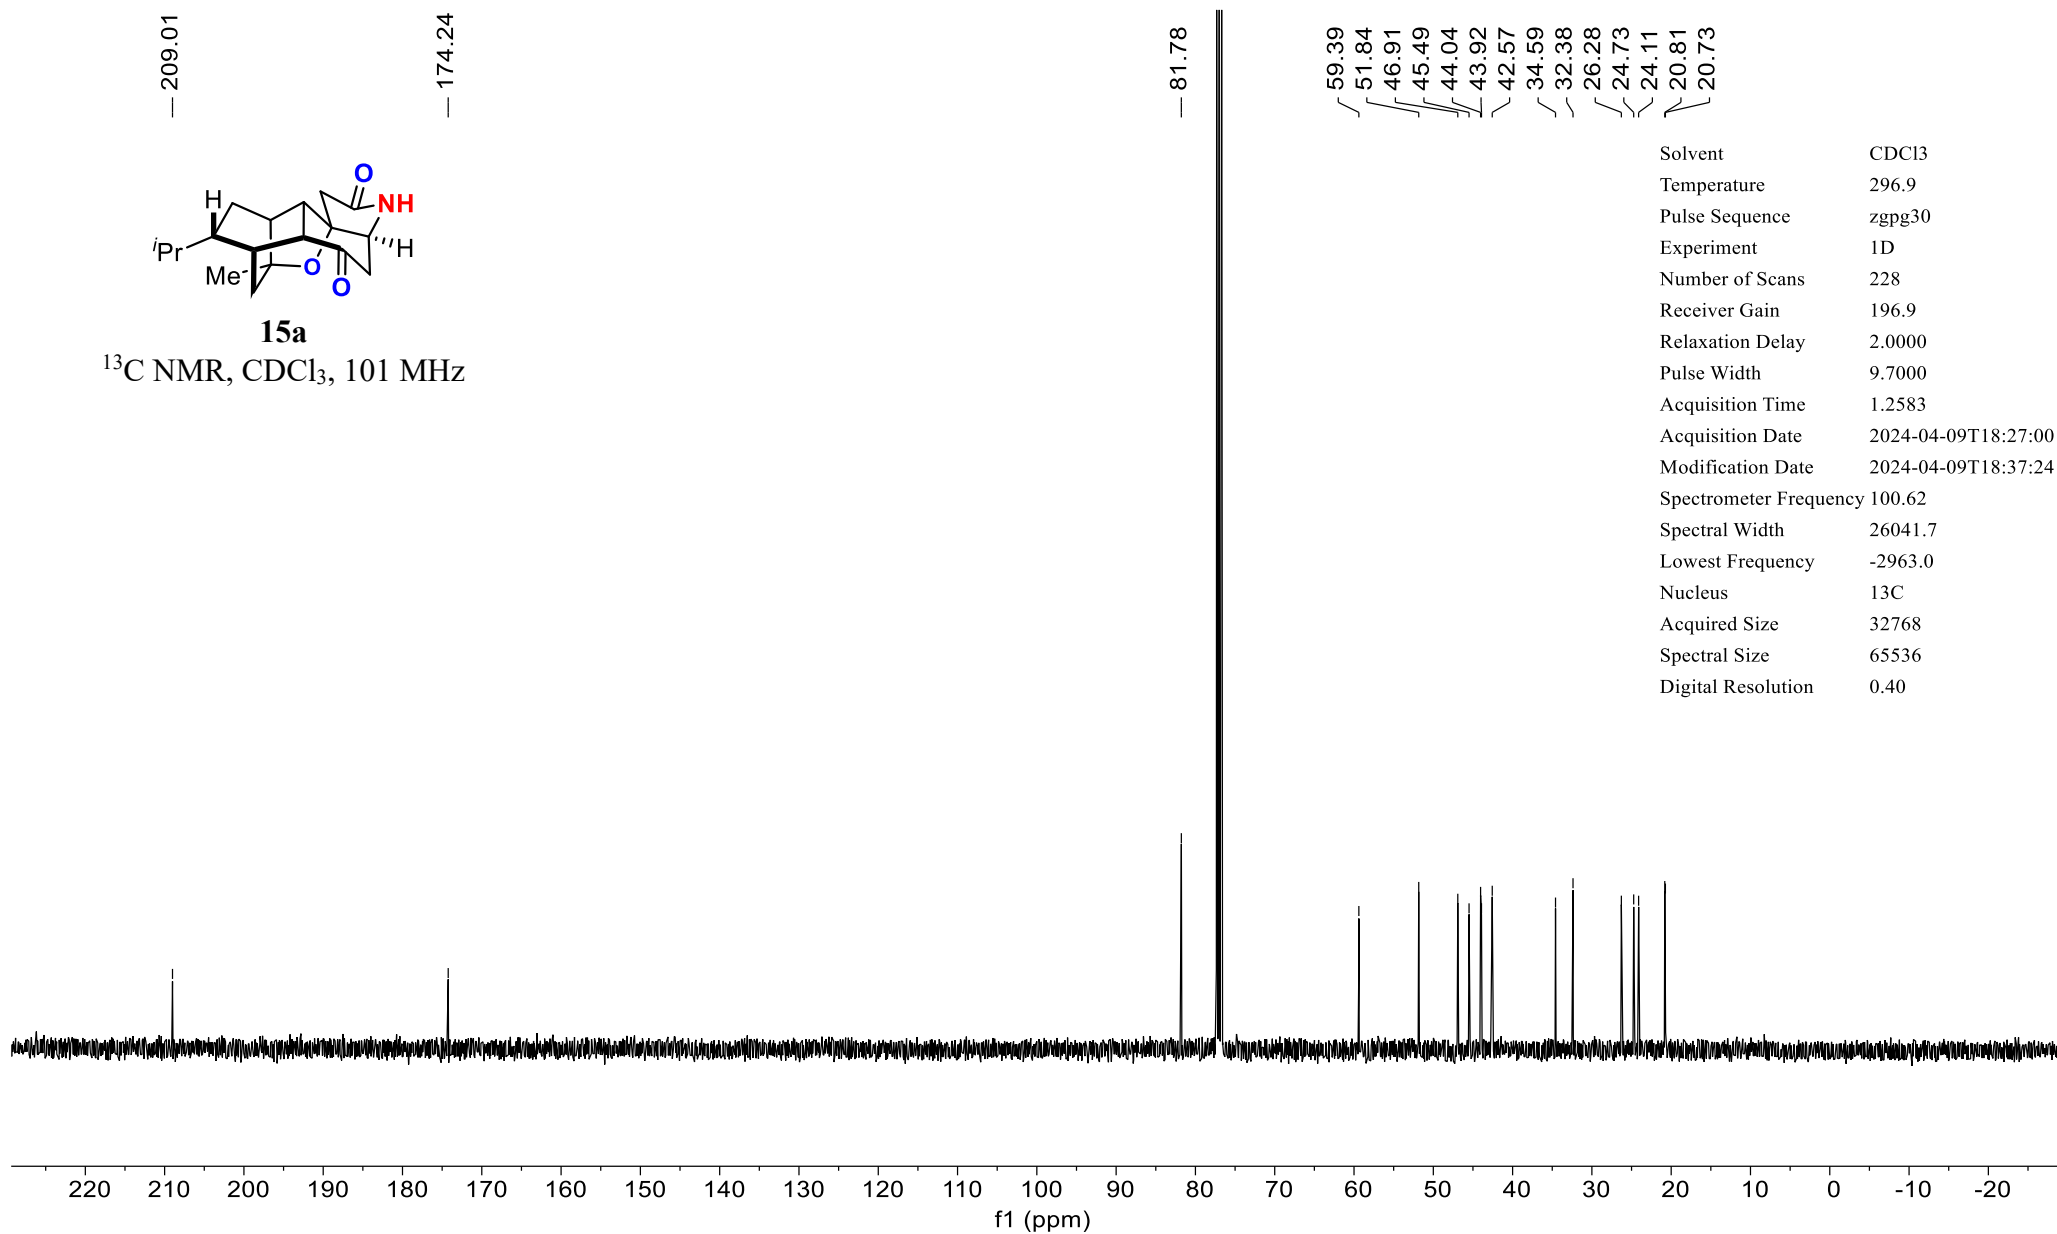

<sup>1</sup>H NMR of sarglamide F (17)

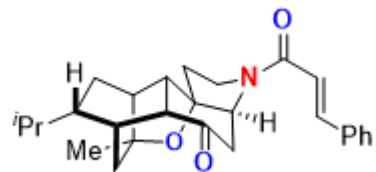

Sarglamide F (17)

<sup>1</sup>H NMR, CDCl<sub>3</sub>, 400 MHz

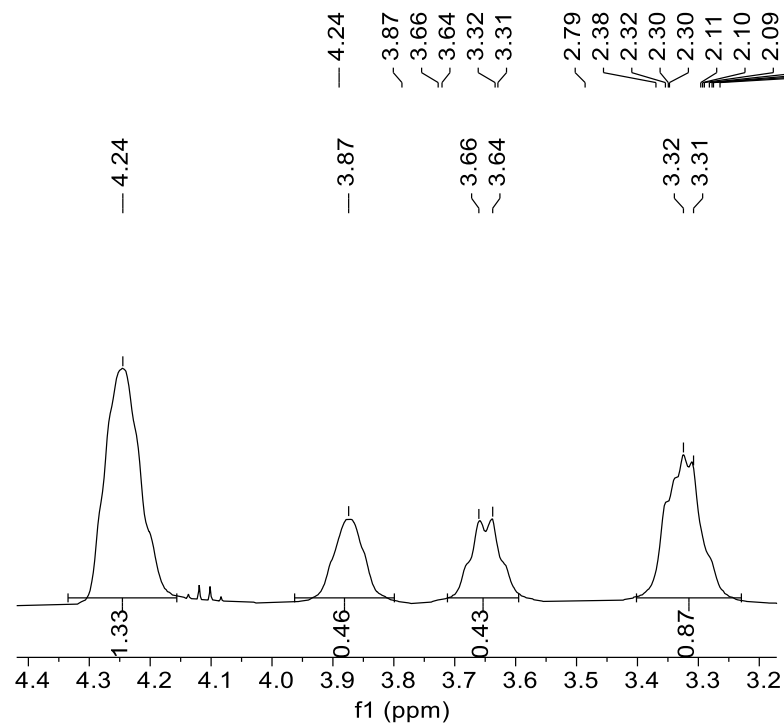

|                        |                     |
|------------------------|---------------------|
| Solvent                | CDCl <sub>3</sub>   |
| Temperature            | 296.1               |
| Pulse Sequence         | zg30                |
| Experiment             | 1D                  |
| Number of Scans        | 16                  |
| Receiver Gain          | 62.9                |
| Relaxation Delay       | 1.0000              |
| Pulse Width            | 14.5000             |
| Acquisition Time       | 4.0894              |
| Acquisition Date       | 2023-08-22T12:08:00 |
| Modification Date      | 2023-08-21T21:08:12 |
| Spectrometer Frequency | 400.13              |
| Spectral Width         | 8012.8              |
| Lowest Frequency       | -1545.1             |
| Nucleus                | 1H                  |
| Acquired Size          | 32768               |
| Spectral Size          | 65536               |
| Digital Resolution     | 0.12                |

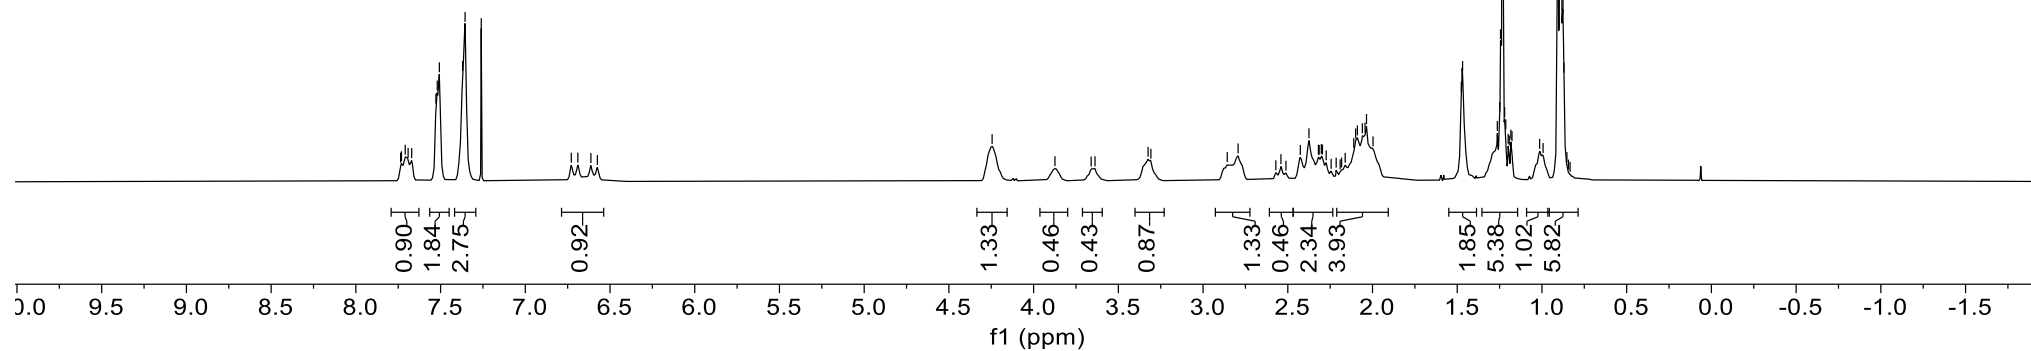

# <sup>13</sup>C NMR of Sarglamide F (17)

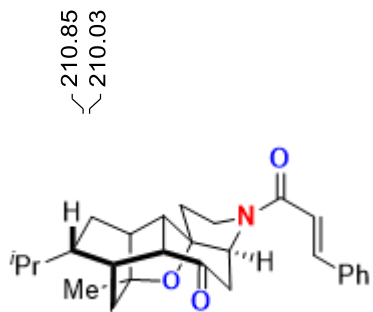

Sarglamide F (17)  
<sup>13</sup>C NMR, CDCl<sub>3</sub>, 101 MHz

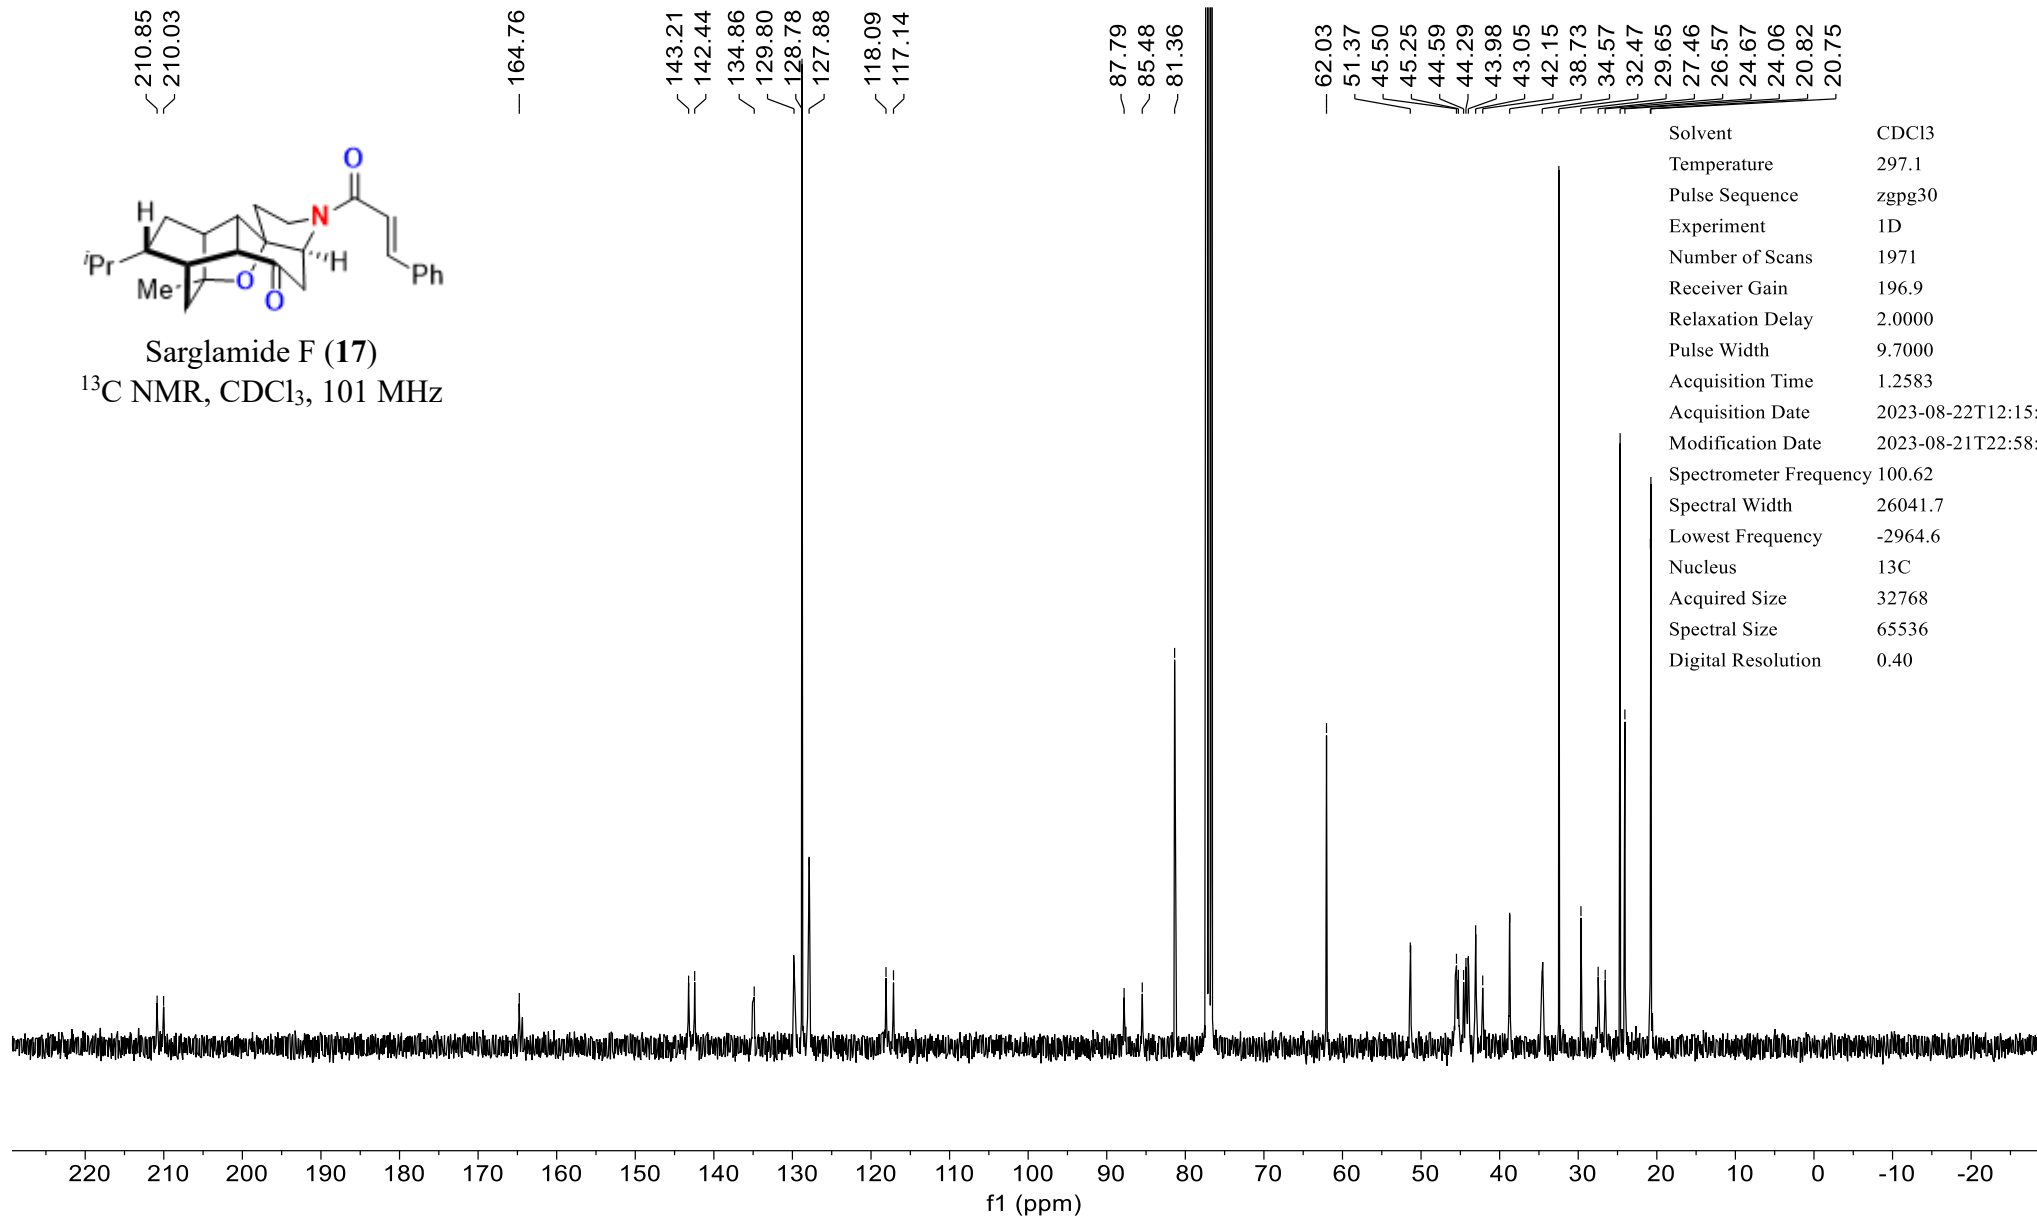

|                        |                     |
|------------------------|---------------------|
| Solvent                | CDCl <sub>3</sub>   |
| Temperature            | 297.1               |
| Pulse Sequence         | zgpg30              |
| Experiment             | 1D                  |
| Number of Scans        | 1971                |
| Receiver Gain          | 196.9               |
| Relaxation Delay       | 2.0000              |
| Pulse Width            | 9.7000              |
| Acquisition Time       | 1.2583              |
| Acquisition Date       | 2023-08-22T12:15:00 |
| Modification Date      | 2023-08-21T22:58:30 |
| Spectrometer Frequency | 100.62              |
| Spectral Width         | 26041.7             |
| Lowest Frequency       | -2964.6             |
| Nucleus                | 13C                 |
| Acquired Size          | 32768               |
| Spectral Size          | 65536               |
| Digital Resolution     | 0.40                |

<sup>1</sup>H NMR of **21a**

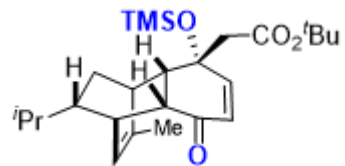

**21a**

<sup>1</sup>H NMR, CDCl<sub>3</sub>, 400 MHz

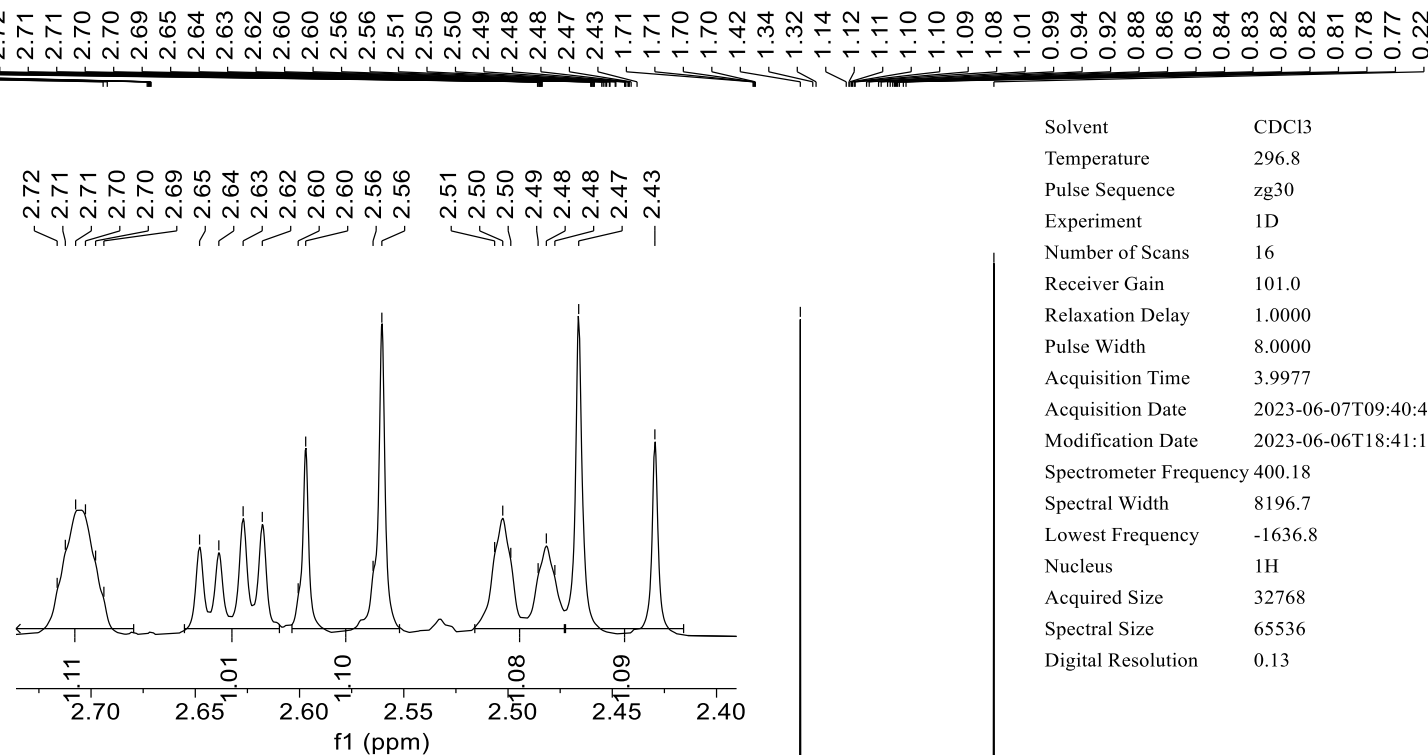

|                        |                     |
|------------------------|---------------------|
| Solvent                | CDCl <sub>3</sub>   |
| Temperature            | 296.8               |
| Pulse Sequence         | zg30                |
| Experiment             | 1D                  |
| Number of Scans        | 16                  |
| Receiver Gain          | 101.0               |
| Relaxation Delay       | 1.0000              |
| Pulse Width            | 8.0000              |
| Acquisition Time       | 3.9977              |
| Acquisition Date       | 2023-06-07T09:40:48 |
| Modification Date      | 2023-06-06T18:41:12 |
| Spectrometer Frequency | 400.18              |
| Spectral Width         | 8196.7              |
| Lowest Frequency       | -1636.8             |
| Nucleus                | <sup>1</sup> H      |
| Acquired Size          | 32768               |
| Spectral Size          | 65536               |
| Digital Resolution     | 0.13                |

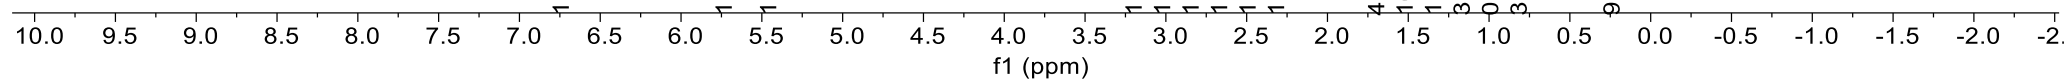

<sup>13</sup>C NMR of **21a**

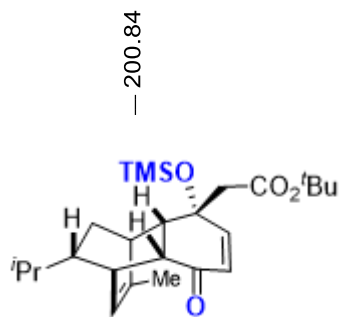

**21a**

<sup>13</sup>C NMR, CDCl<sub>3</sub>, 101 MHz

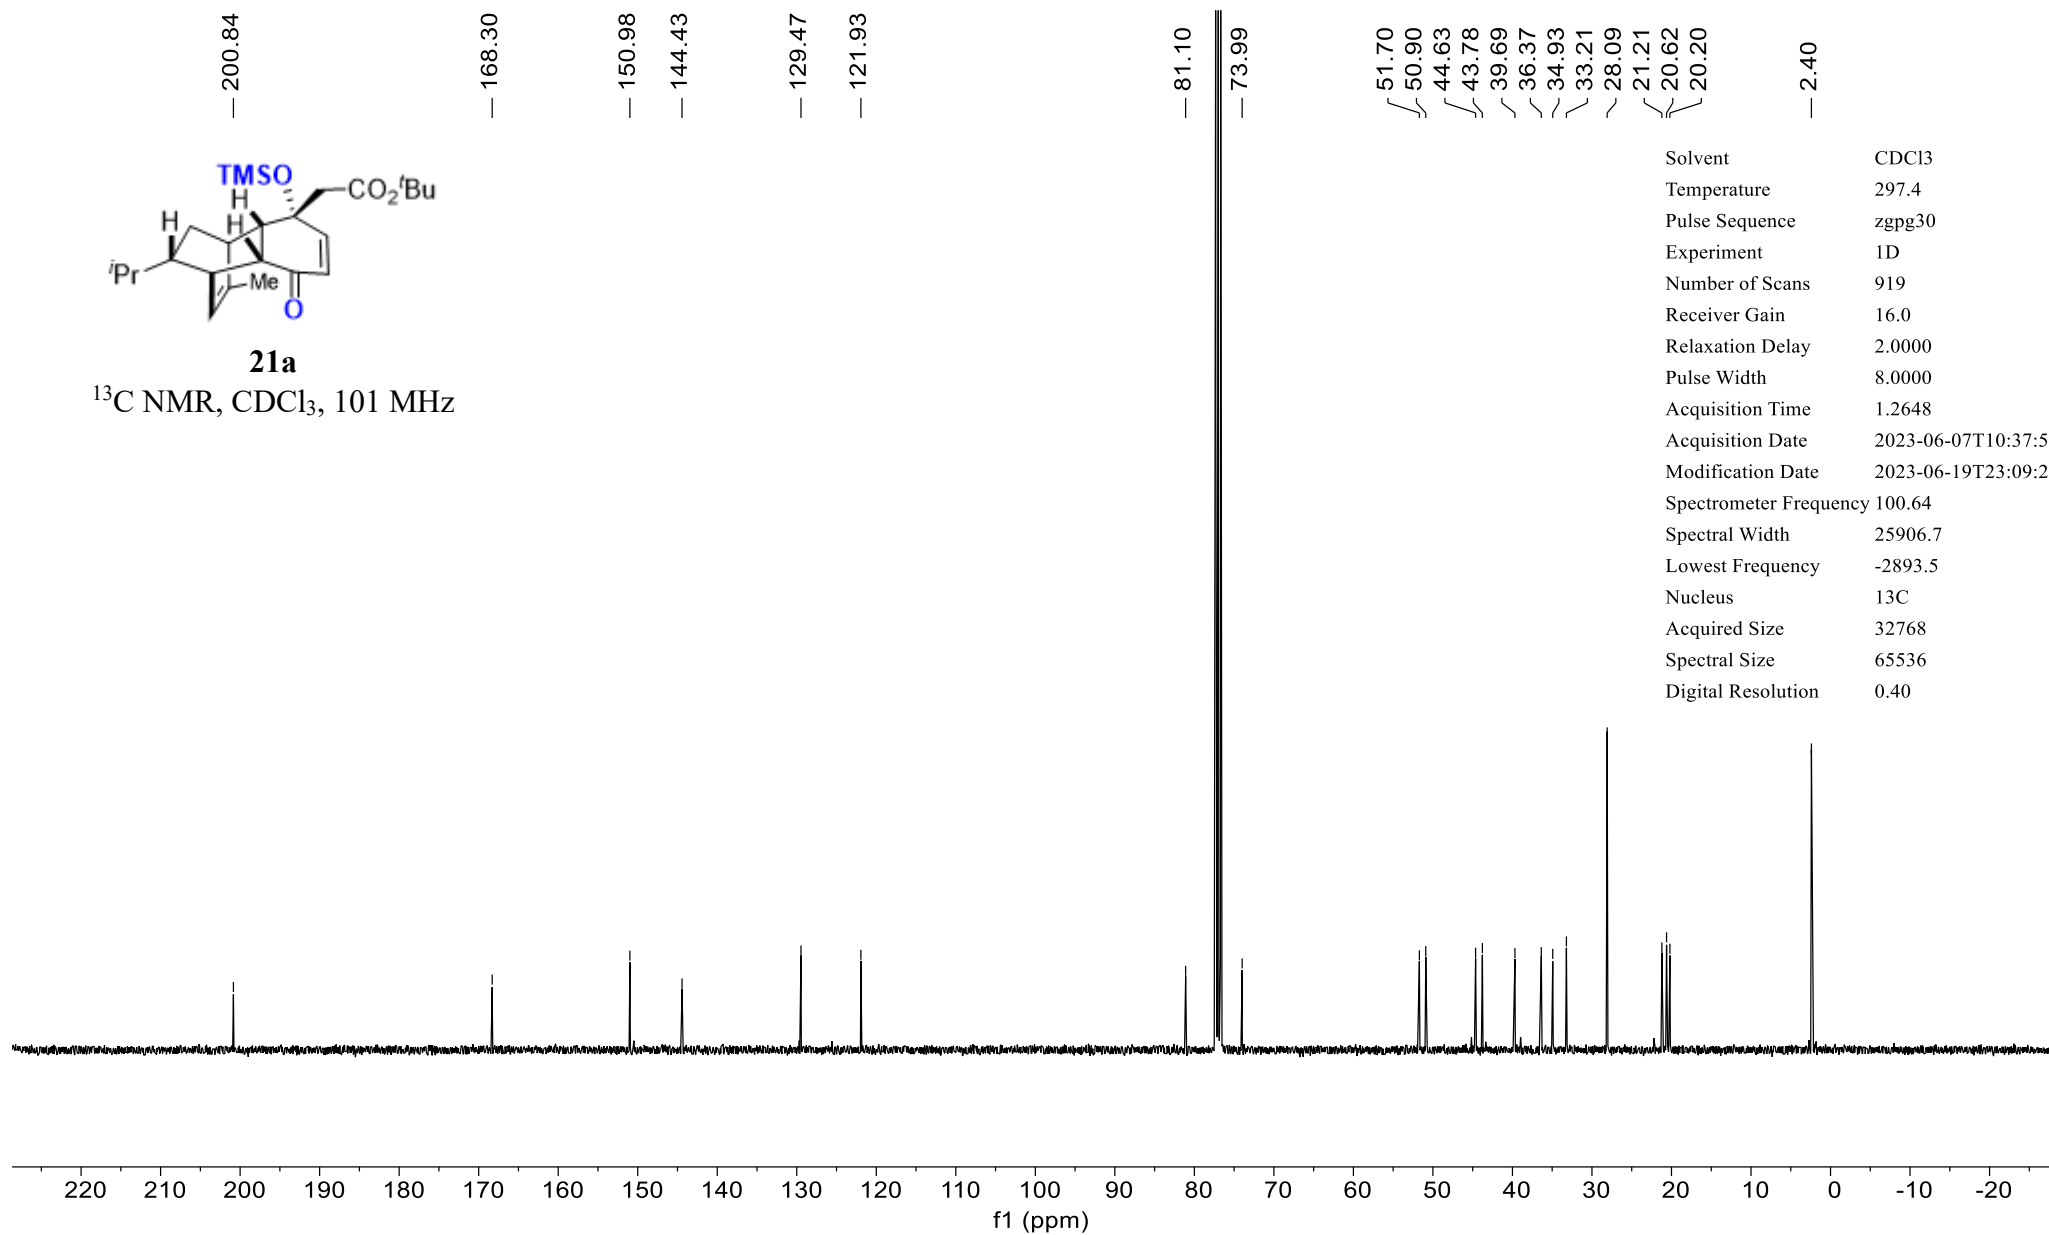

|                        |                     |
|------------------------|---------------------|
| Solvent                | CDCl <sub>3</sub>   |
| Temperature            | 297.4               |
| Pulse Sequence         | zgpg30              |
| Experiment             | 1D                  |
| Number of Scans        | 919                 |
| Receiver Gain          | 16.0                |
| Relaxation Delay       | 2.0000              |
| Pulse Width            | 8.0000              |
| Acquisition Time       | 1.2648              |
| Acquisition Date       | 2023-06-07T10:37:50 |
| Modification Date      | 2023-06-19T23:09:24 |
| Spectrometer Frequency | 100.64              |
| Spectral Width         | 25906.7             |
| Lowest Frequency       | -2893.5             |
| Nucleus                | <sup>13</sup> C     |
| Acquired Size          | 32768               |
| Spectral Size          | 65536               |
| Digital Resolution     | 0.40                |

<sup>1</sup>H NMR of **18a**

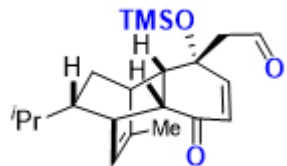

**18a**

<sup>1</sup>H NMR, CDCl<sub>3</sub>, 400 MHz

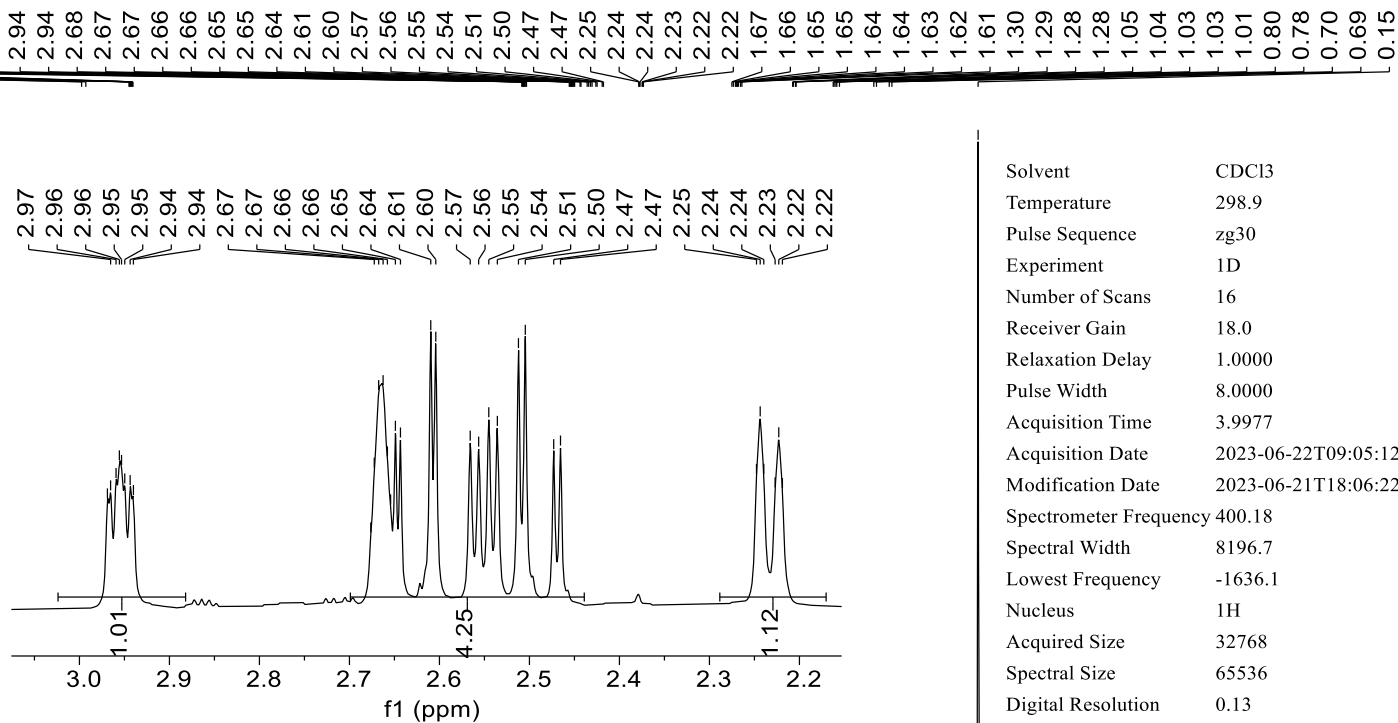

|                        |                     |
|------------------------|---------------------|
| Solvent                | CDCl <sub>3</sub>   |
| Temperature            | 298.9               |
| Pulse Sequence         | zg30                |
| Experiment             | 1D                  |
| Number of Scans        | 16                  |
| Receiver Gain          | 18.0                |
| Relaxation Delay       | 1.0000              |
| Pulse Width            | 8.0000              |
| Acquisition Time       | 3.9977              |
| Acquisition Date       | 2023-06-22T09:05:12 |
| Modification Date      | 2023-06-21T18:06:22 |
| Spectrometer Frequency | 400.18              |
| Spectral Width         | 8196.7              |
| Lowest Frequency       | -1636.1             |
| Nucleus                | <sup>1</sup> H      |
| Acquired Size          | 32768               |
| Spectral Size          | 65536               |
| Digital Resolution     | 0.13                |

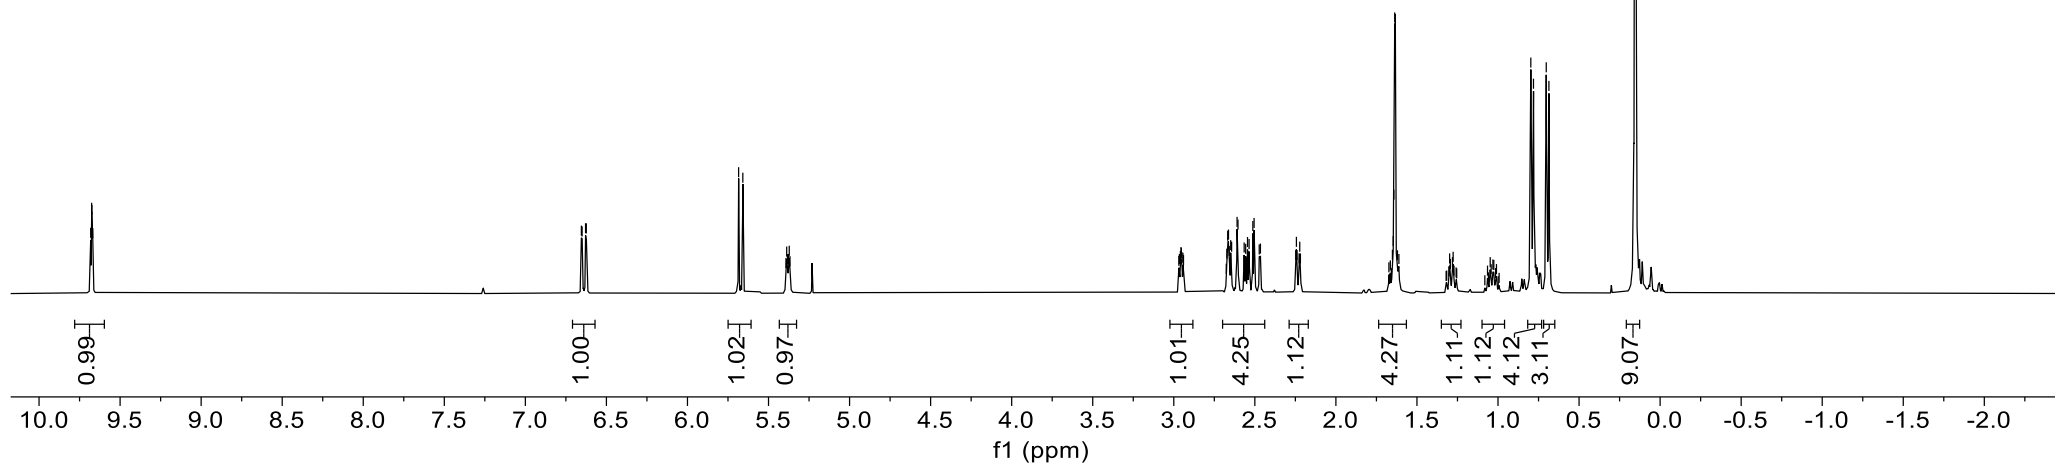

<sup>13</sup>C NMR of **18a**

199.84  
199.65

149.56  
144.15

130.03  
122.03

74.16

58.61  
50.38  
45.50  
43.37  
39.79  
36.10  
34.58  
32.96  
20.99  
20.38  
19.98

2.25

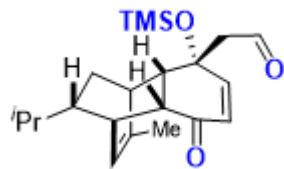

**18a**

<sup>13</sup>C NMR, CDCl<sub>3</sub>, 101 MHz

|                        |                     |
|------------------------|---------------------|
| Solvent                | CDCl <sub>3</sub>   |
| Temperature            | 299.2               |
| Pulse Sequence         | zgpg30              |
| Experiment             | 1D                  |
| Number of Scans        | 38                  |
| Receiver Gain          | 10.0                |
| Relaxation Delay       | 2.0000              |
| Pulse Width            | 8.0000              |
| Acquisition Time       | 1.2648              |
| Acquisition Date       | 2023-06-22T09:08:47 |
| Modification Date      | 2023-06-21T18:08:46 |
| Spectrometer Frequency | 100.64              |
| Spectral Width         | 25906.7             |
| Lowest Frequency       | -2904.5             |
| Nucleus                | 13C                 |
| Acquired Size          | 32768               |
| Spectral Size          | 65536               |
| Digital Resolution     | 0.40                |

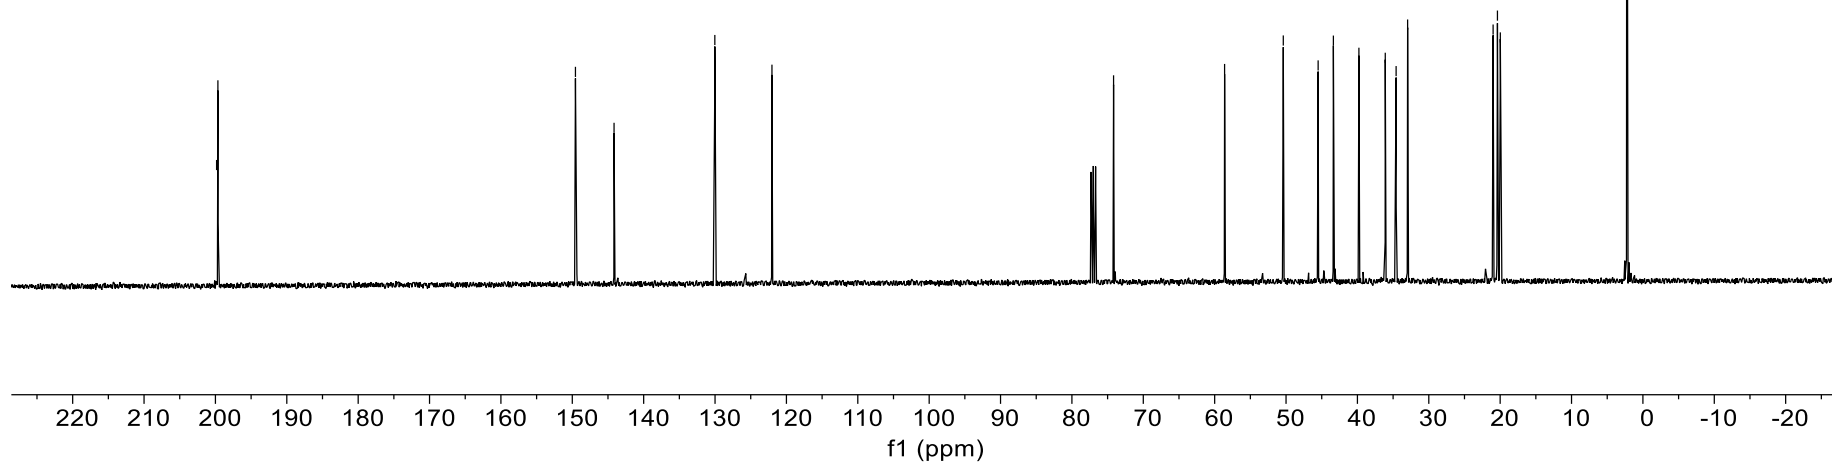

<sup>1</sup>H NMR of 19a

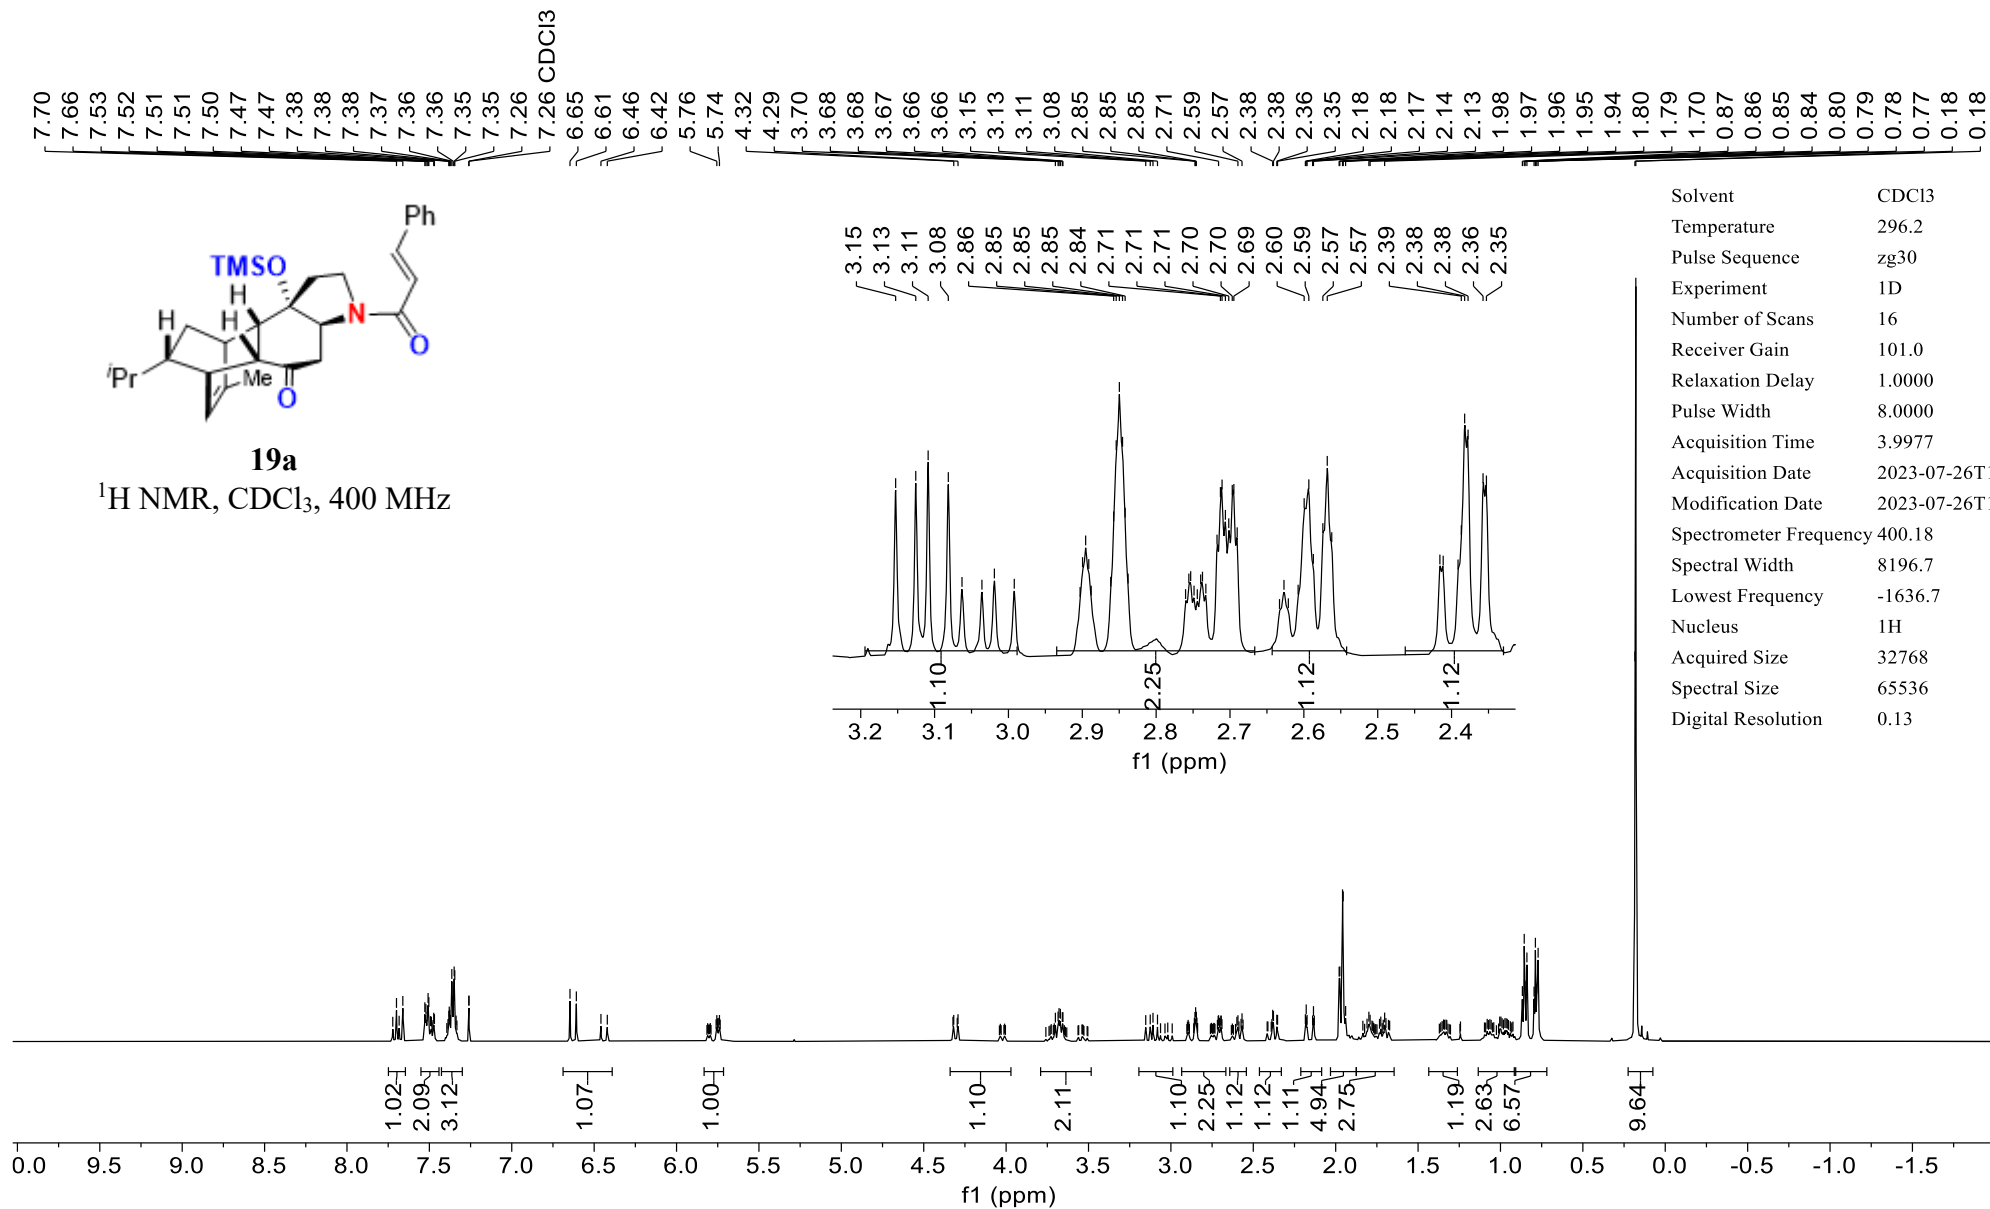



<sup>1</sup>H NMR of 19a

214.88  
212.76

164.43  
164.20

142.71  
142.65  
142.52  
142.31  
135.12  
135.09  
129.67  
128.80  
128.73  
127.89  
127.75  
123.75  
123.27  
118.05  
117.82

82.47  
80.92

62.45  
62.24

53.69  
53.33  
47.51  
46.75  
46.52  
46.05  
46.03  
45.78  
43.21  
39.19  
39.00  
37.16  
37.14  
33.33  
33.30  
33.16  
33.07  
21.13  
20.54  
20.43  
20.24  
20.21  
2.20  
2.12

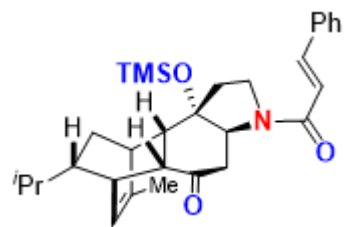

19a

<sup>13</sup>C NMR, CDCl<sub>3</sub>, 101 MHz

|                        |                     |
|------------------------|---------------------|
| Solvent                | CDCl <sub>3</sub>   |
| Temperature            | 296.9               |
| Pulse Sequence         | zgpg30              |
| Experiment             | 1D                  |
| Number of Scans        | 729                 |
| Receiver Gain          | 10.0                |
| Relaxation Delay       | 2.0000              |
| Pulse Width            | 8.0000              |
| Acquisition Time       | 1.2648              |
| Acquisition Date       | 2023-07-26T12:07:41 |
| Modification Date      | 2023-07-26T13:35:16 |
| Spectrometer Frequency | 100.64              |
| Spectral Width         | 25906.7             |
| Lowest Frequency       | -2896.6             |
| Nucleus                | 13C                 |
| Acquired Size          | 32768               |
| Spectral Size          | 65536               |
| Digital Resolution     | 0.40                |

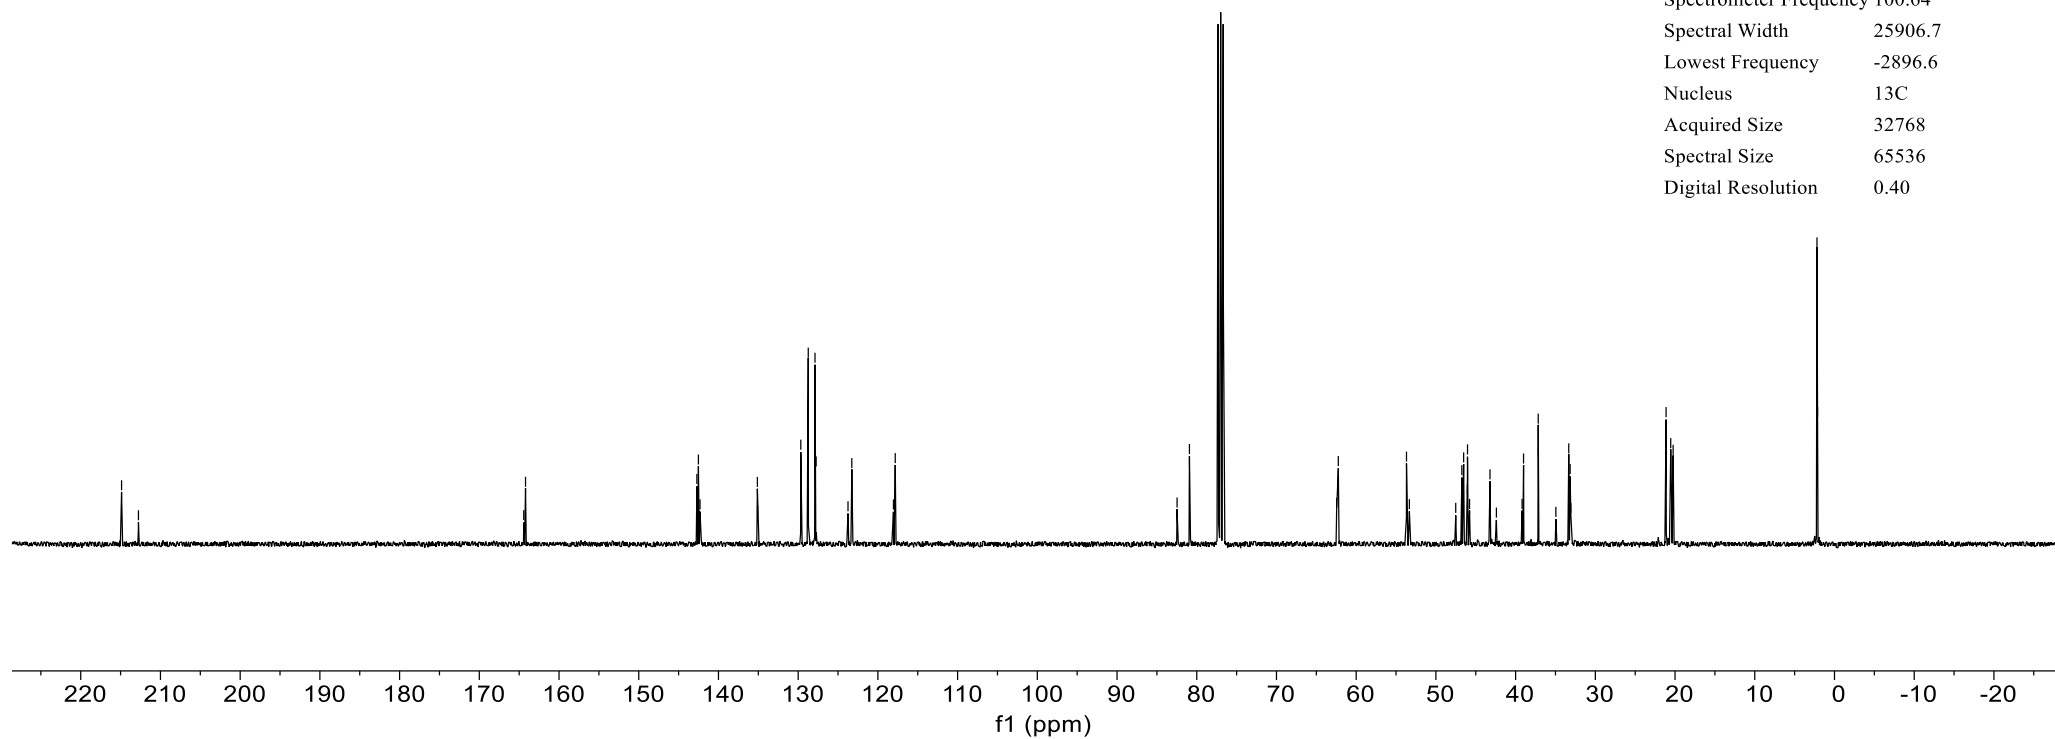

<sup>1</sup>H NMR of Sarglamide A (1)

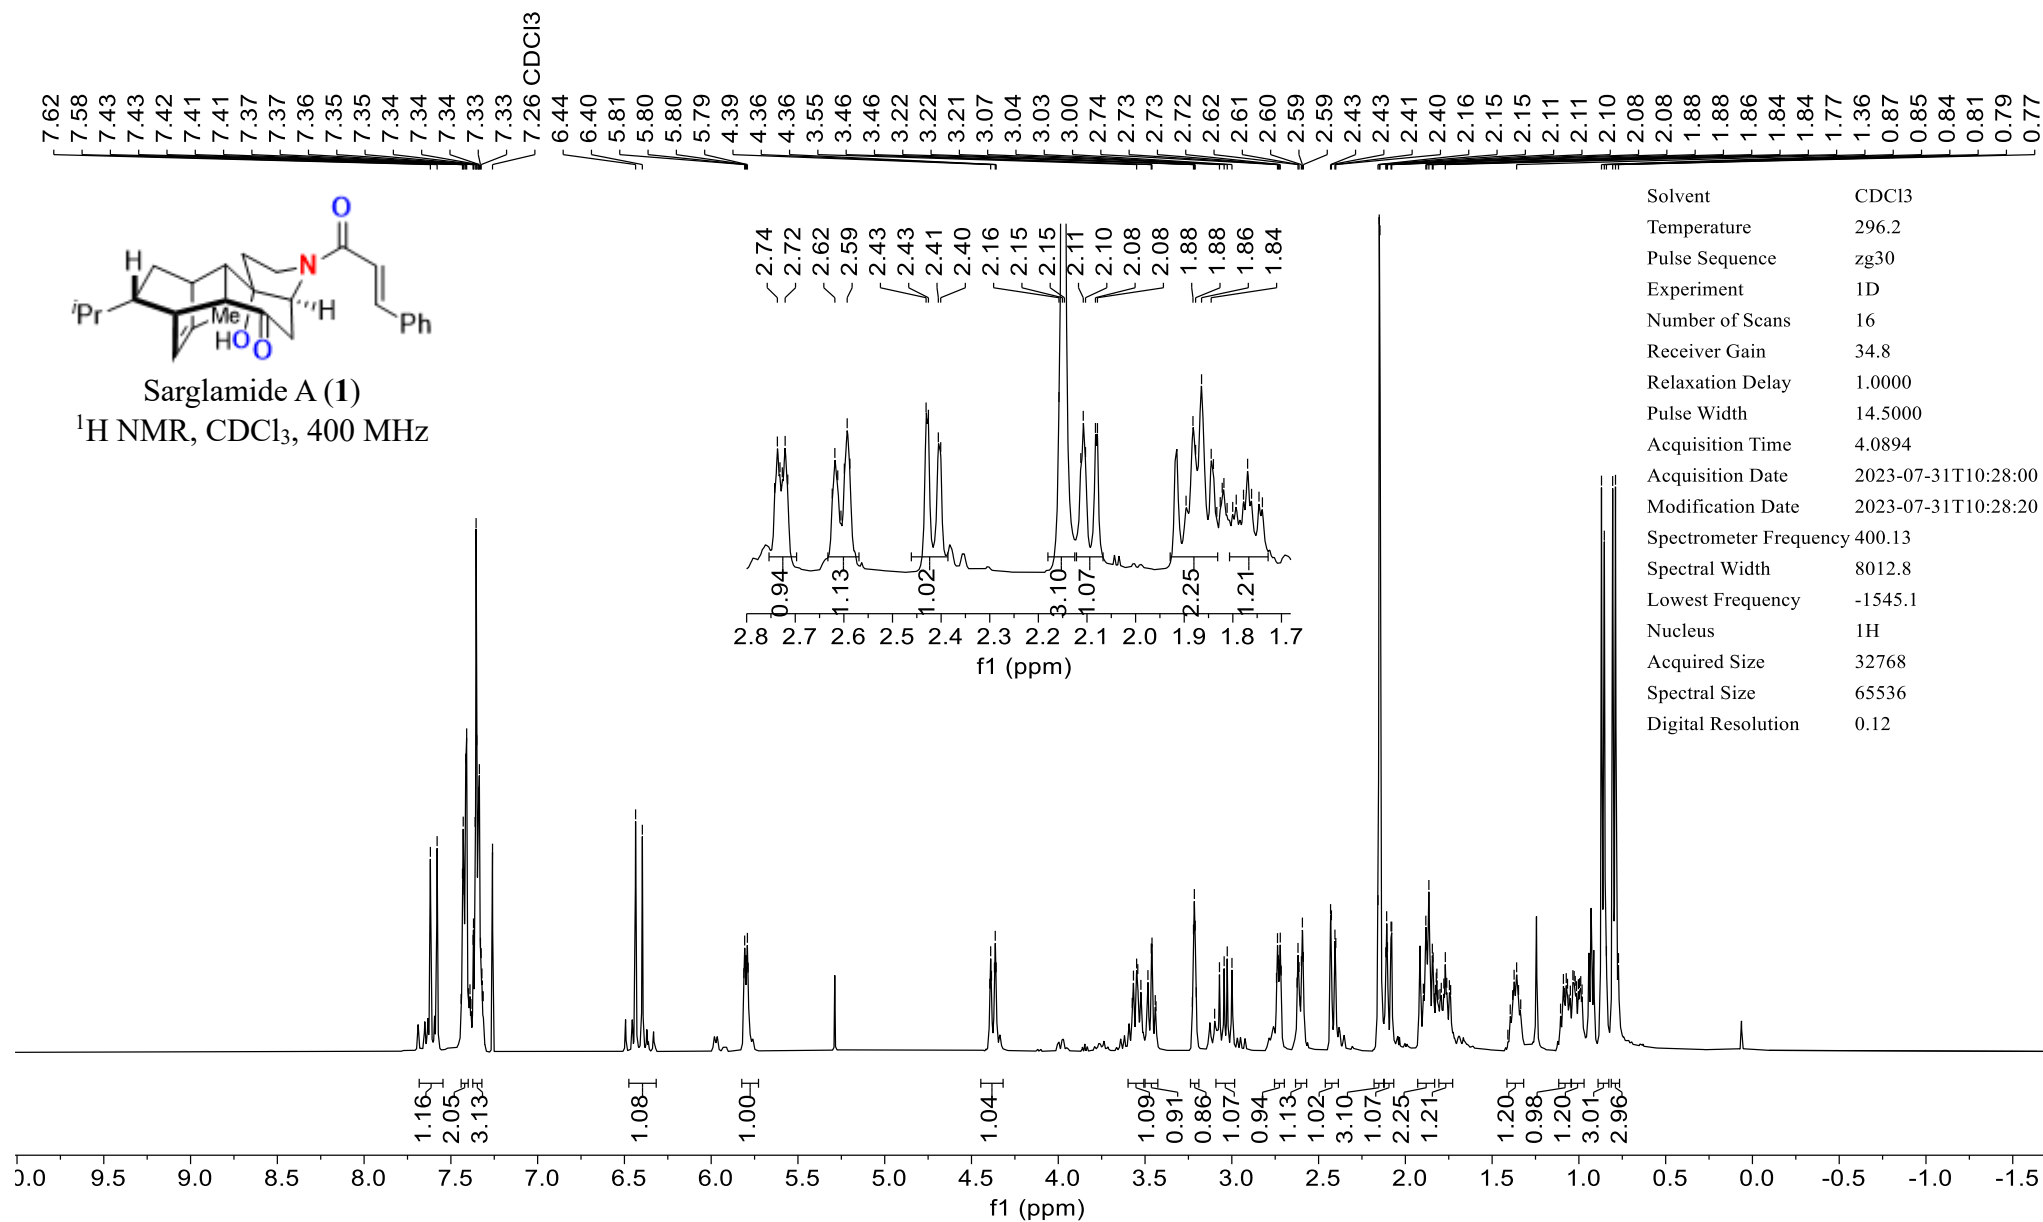

<sup>13</sup>C NMR of Sarglamide A (1)

— 215.04 — 164.58

143.17 142.45 134.88 130.13 128.97 128.02 123.26 117.64

76.54

60.37 53.66 46.52 46.42 46.37 43.68 39.12 37.84 36.66 33.50 33.19 21.25 20.69 20.42

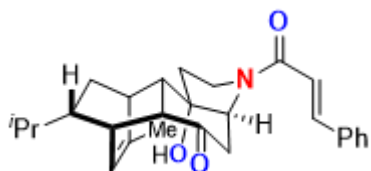

Sarglamide A (1)

<sup>13</sup>C NMR, CDCl<sub>3</sub>, 101 MHz

|                        |                     |
|------------------------|---------------------|
| Solvent                | CDCl <sub>3</sub>   |
| Temperature            | 296.9               |
| Pulse Sequence         | zgpg30              |
| Experiment             | 1D                  |
| Number of Scans        | 115                 |
| Receiver Gain          | 196.9               |
| Relaxation Delay       | 2.0000              |
| Pulse Width            | 9.7000              |
| Acquisition Time       | 1.2583              |
| Acquisition Date       | 2023-07-31T10:31:37 |
| Modification Date      | 2023-07-31T10:35:38 |
| Spectrometer Frequency | 100.62              |
| Spectral Width         | 26041.7             |
| Lowest Frequency       | -2965.4             |
| Nucleus                | <sup>13</sup> C     |
| Acquired Size          | 32768               |
| Spectral Size          | 65536               |
| Digital Resolution     | 0.40                |

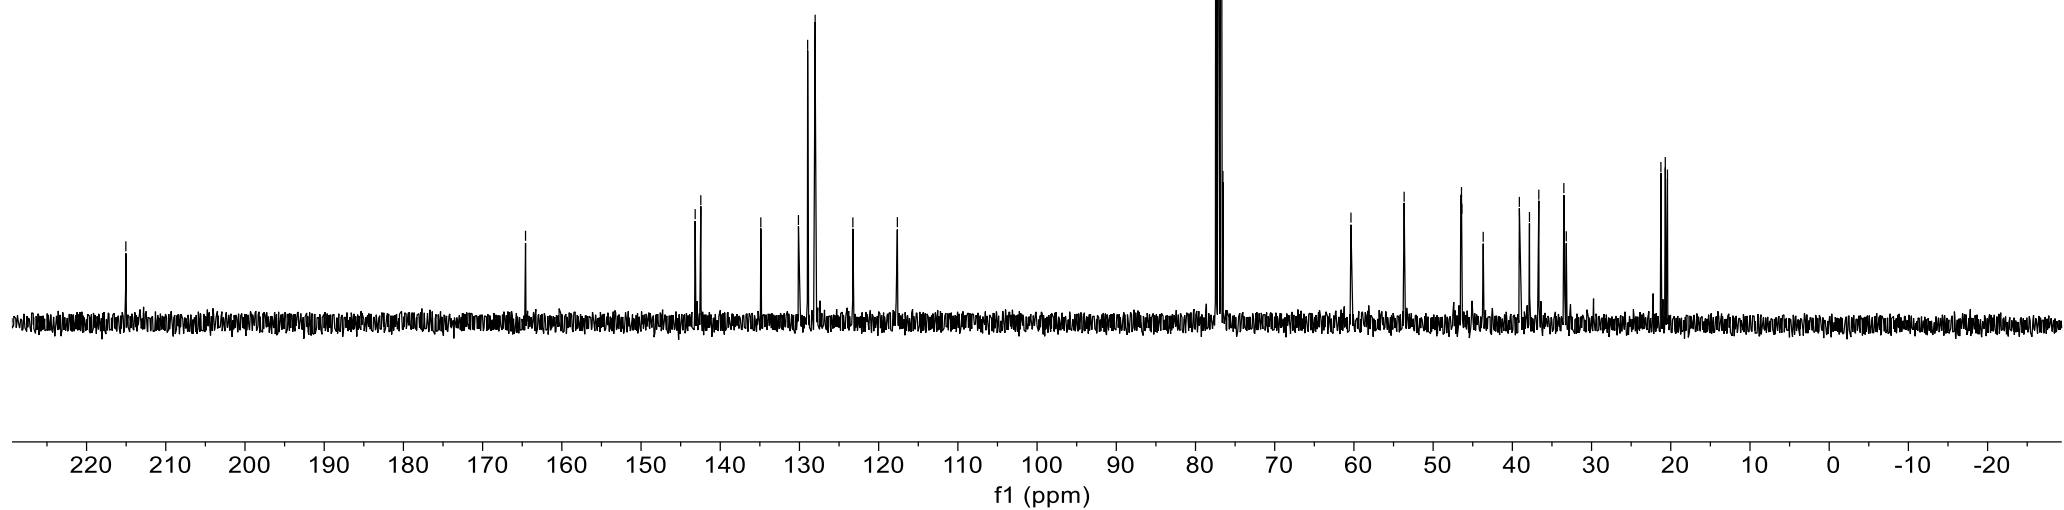

# <sup>1</sup>H NMR of 21b

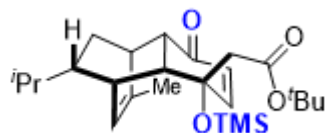

**21b**

<sup>1</sup>H NMR, CDCl<sub>3</sub>, 400 MHz

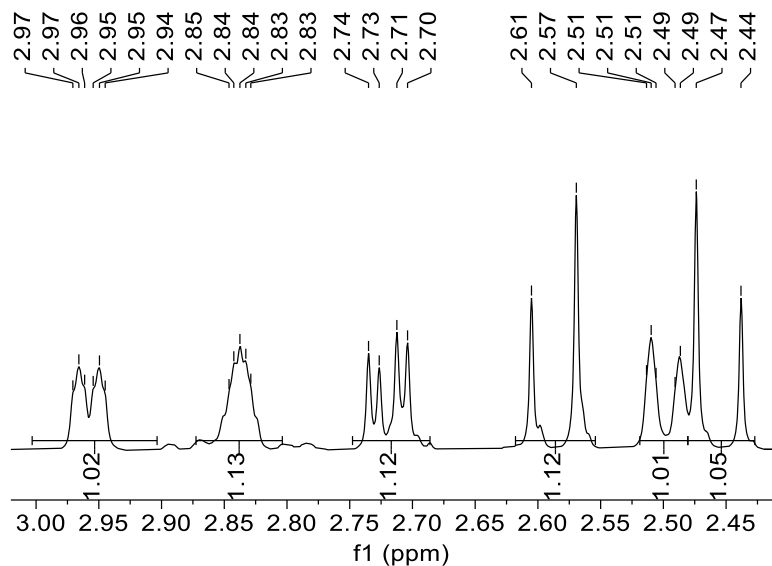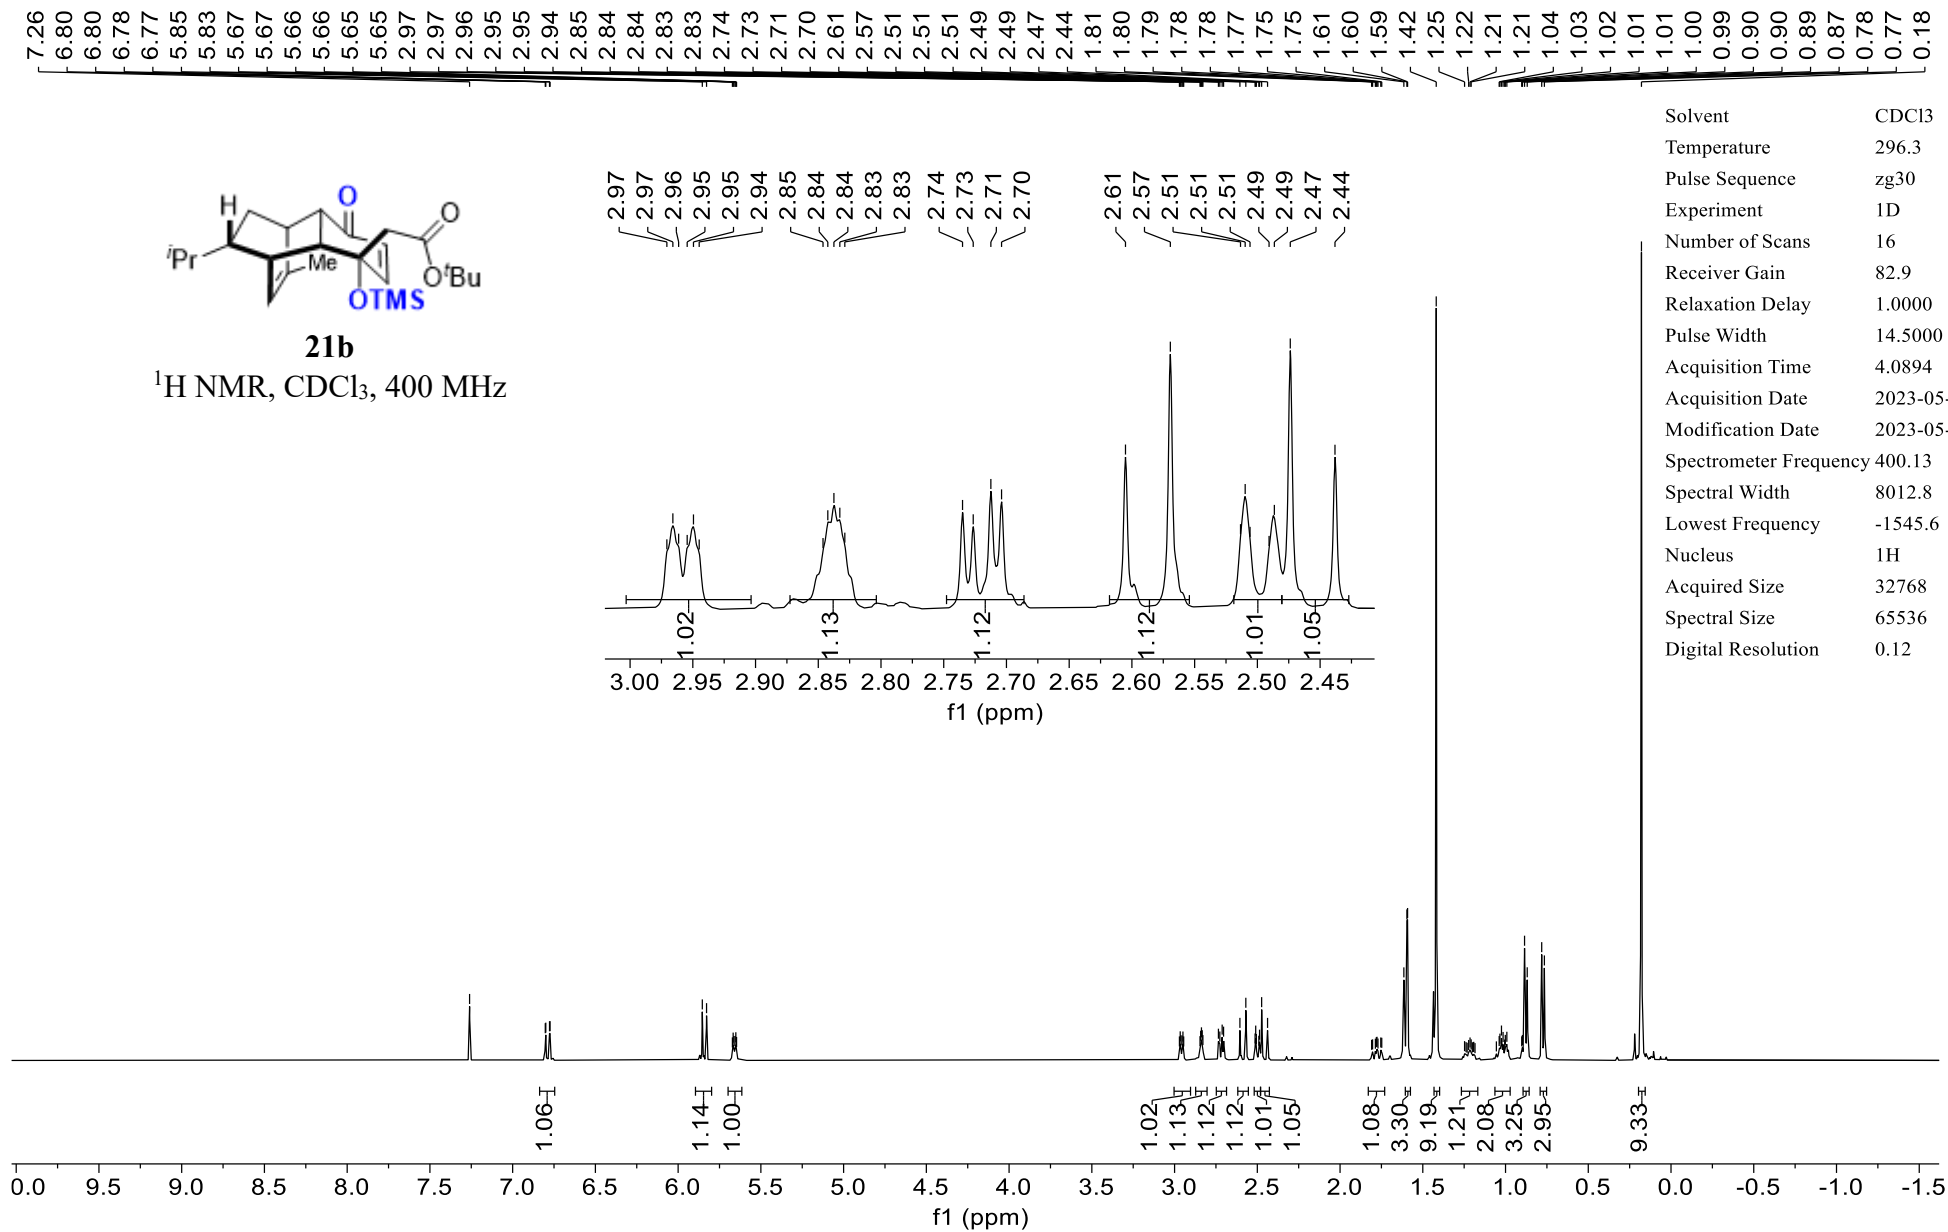

|                        |                     |
|------------------------|---------------------|
| Solvent                | CDCl <sub>3</sub>   |
| Temperature            | 296.3               |
| Pulse Sequence         | zg30                |
| Experiment             | 1D                  |
| Number of Scans        | 16                  |
| Receiver Gain          | 82.9                |
| Relaxation Delay       | 1.0000              |
| Pulse Width            | 14.5000             |
| Acquisition Time       | 4.0894              |
| Acquisition Date       | 2023-05-25T09:52:00 |
| Modification Date      | 2023-05-24T18:52:14 |
| Spectrometer Frequency | 400.13              |
| Spectral Width         | 8012.8              |
| Lowest Frequency       | -1545.6             |
| Nucleus                | <sup>1</sup> H      |
| Acquired Size          | 32768               |
| Spectral Size          | 65536               |
| Digital Resolution     | 0.12                |

<sup>13</sup>C NMR of **21b**

— 199.85  
— 168.63  
— 152.45  
— 139.33  
— 129.08  
— 124.88  
— 80.98  
— 73.32  
51.96  
49.75  
48.56  
47.68  
42.15  
34.16  
32.85  
30.61  
28.09  
21.20  
20.77  
20.41  
— 2.32

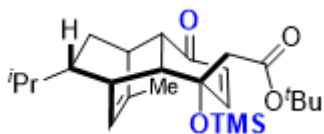

**21b**

<sup>13</sup>C NMR, CDCl<sub>3</sub>, 101 MHz

|                        |                     |
|------------------------|---------------------|
| Solvent                | CDCl <sub>3</sub>   |
| Temperature            | 297.1               |
| Pulse Sequence         | zgpg30              |
| Experiment             | 1D                  |
| Number of Scans        | 184                 |
| Receiver Gain          | 196.9               |
| Relaxation Delay       | 2.0000              |
| Pulse Width            | 9.7000              |
| Acquisition Time       | 1.2583              |
| Acquisition Date       | 2023-05-25T09:59:00 |
| Modification Date      | 2023-05-24T19:08:12 |
| Spectrometer Frequency | 100.62              |
| Spectral Width         | 26041.7             |
| Lowest Frequency       | -2962.2             |
| Nucleus                | <sup>13</sup> C     |
| Acquired Size          | 32768               |
| Spectral Size          | 65536               |
| Digital Resolution     | 0.40                |

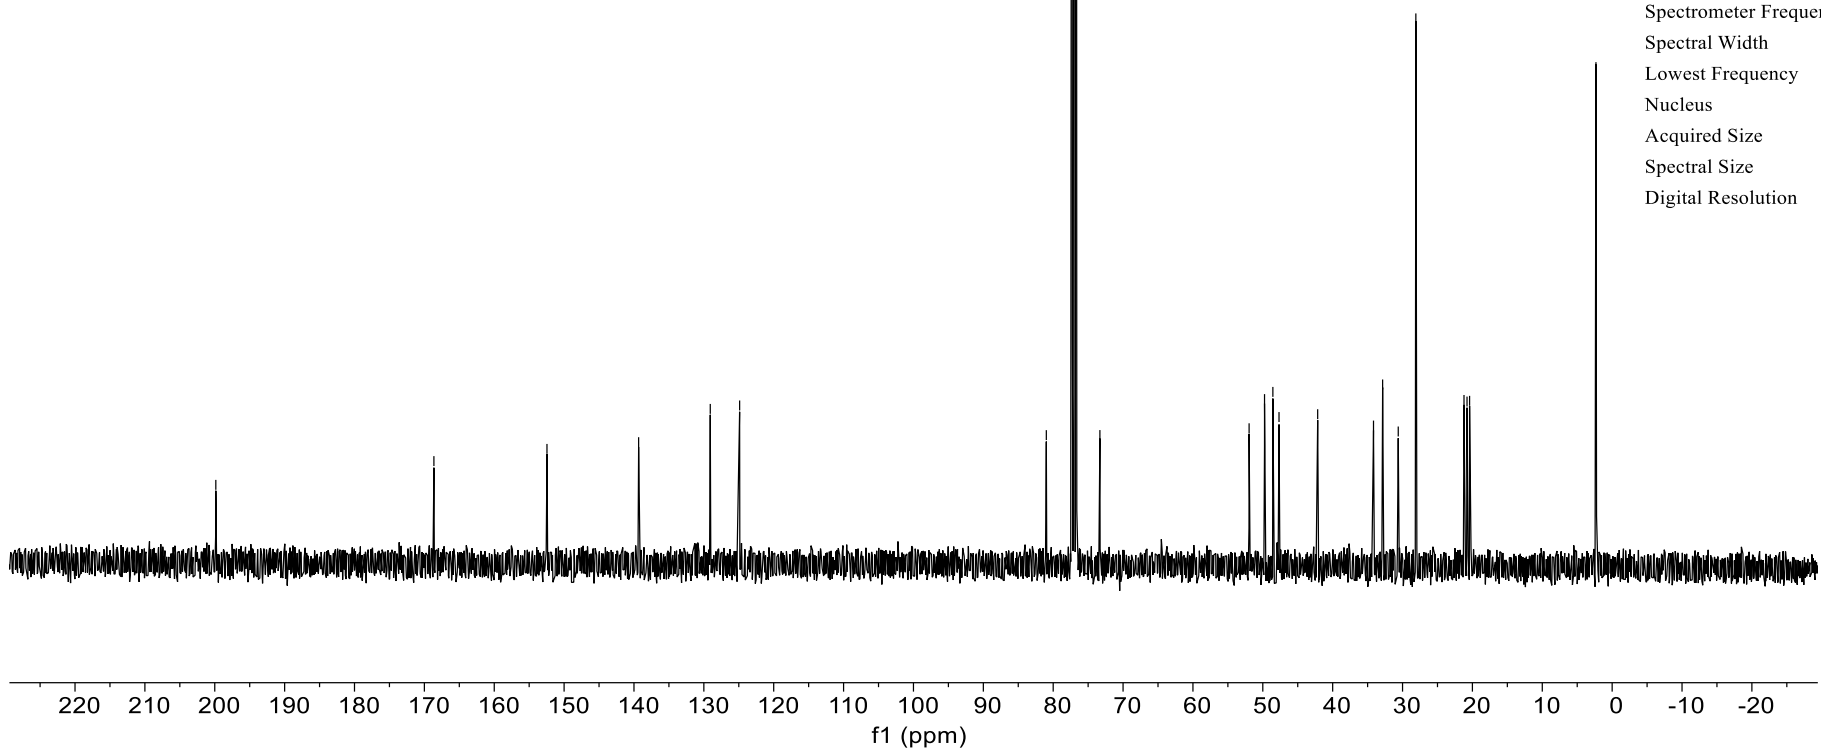

<sup>1</sup>H NMR of **18b**

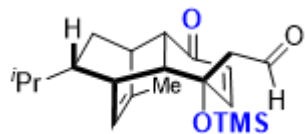

**18b**

<sup>1</sup>H NMR, CDCl<sub>3</sub>, 400 MHz

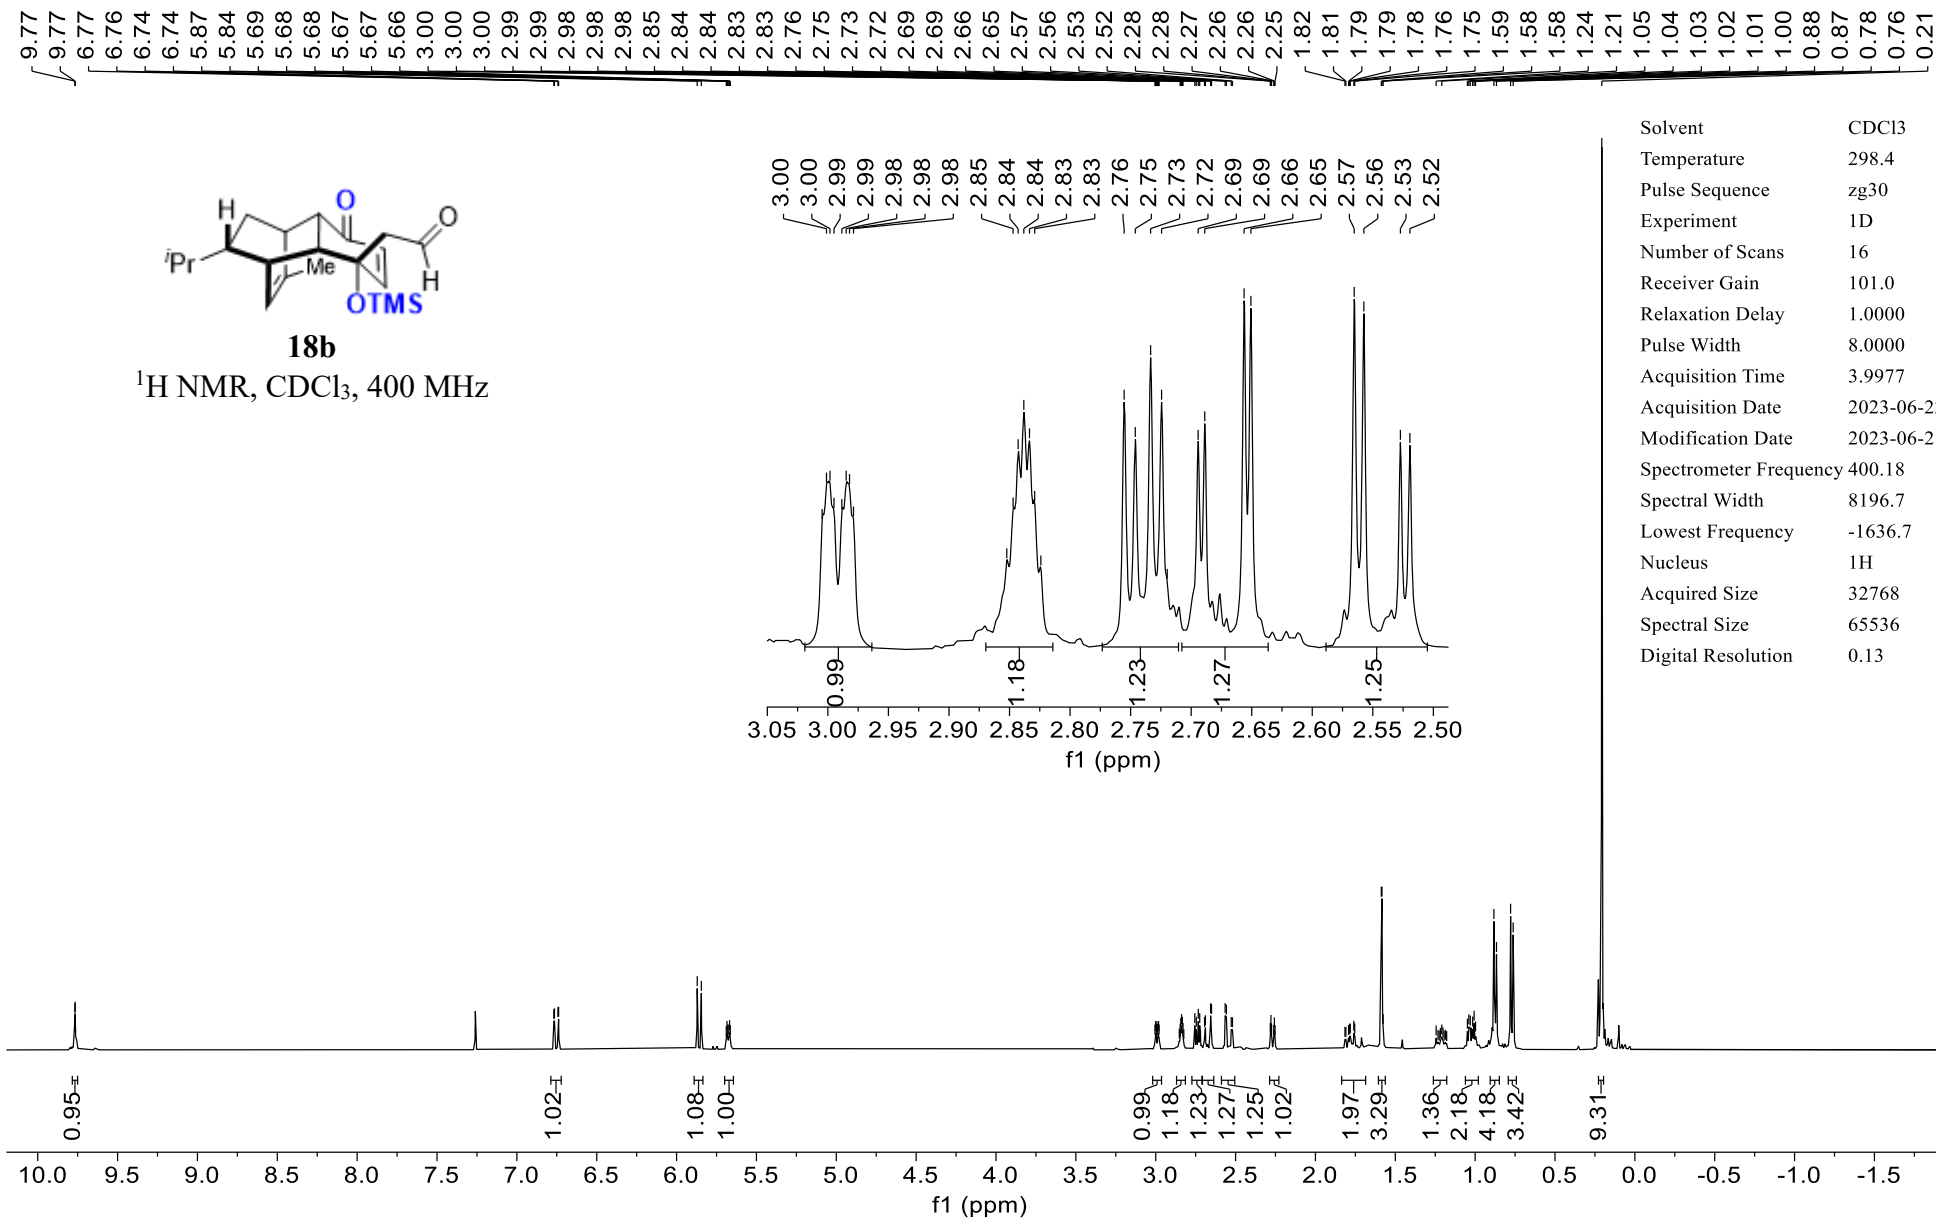

|                        |                     |
|------------------------|---------------------|
| Solvent                | CDCl <sub>3</sub>   |
| Temperature            | 298.4               |
| Pulse Sequence         | zg30                |
| Experiment             | 1D                  |
| Number of Scans        | 16                  |
| Receiver Gain          | 101.0               |
| Relaxation Delay       | 1.0000              |
| Pulse Width            | 8.0000              |
| Acquisition Time       | 3.9977              |
| Acquisition Date       | 2023-06-22T09:13:56 |
| Modification Date      | 2023-06-21T18:14:02 |
| Spectrometer Frequency | 400.18              |
| Spectral Width         | 8196.7              |
| Lowest Frequency       | -1636.7             |
| Nucleus                | <sup>1</sup> H      |
| Acquired Size          | 32768               |
| Spectral Size          | 65536               |
| Digital Resolution     | 0.13                |



<sup>1</sup>H NMR of **19b**

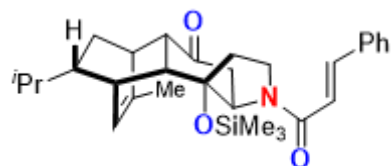

**19b**

<sup>1</sup>H NMR, CDCl<sub>3</sub>, 400 MHz

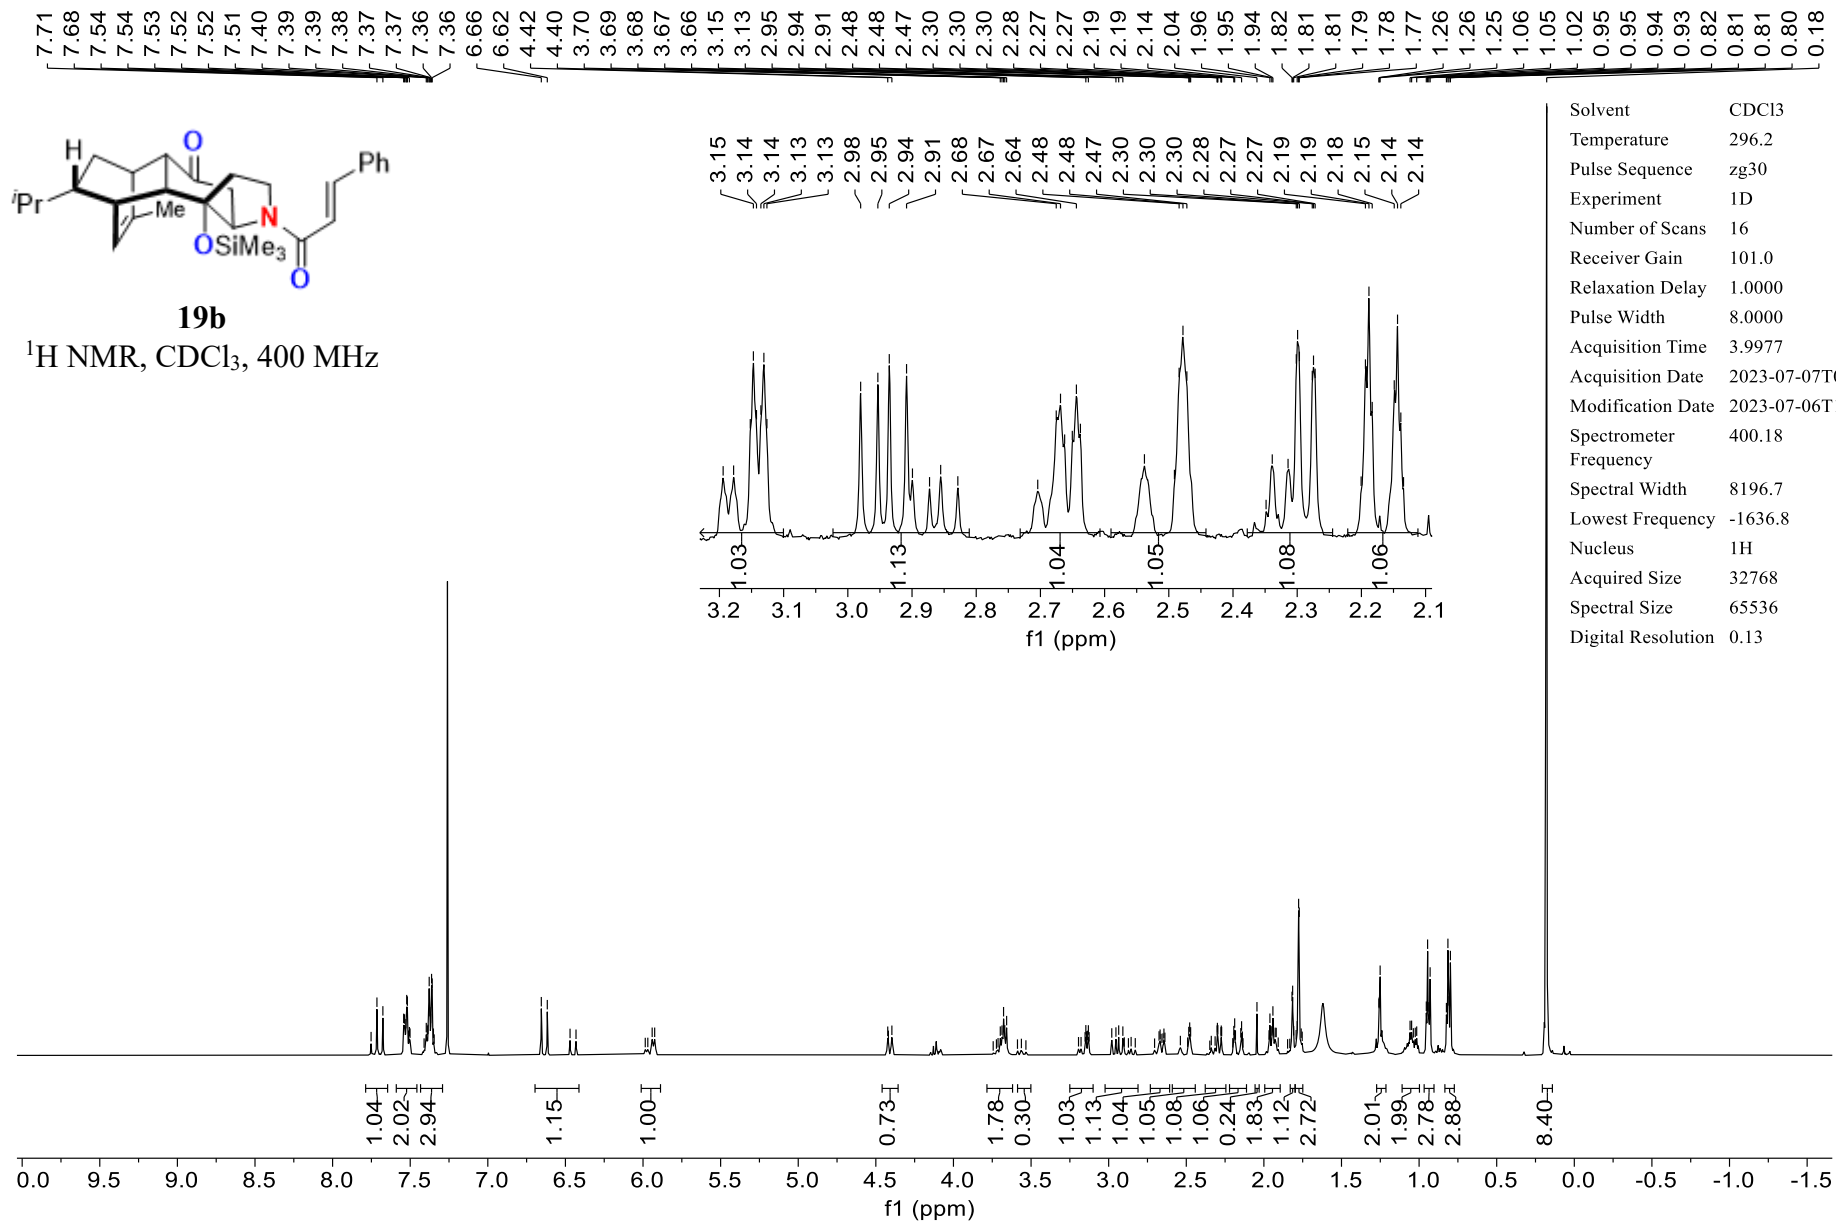



<sup>13</sup>C NMR of **19b**

— 214.62

— 164.28

142.58  
141.34  
135.12  
129.69  
128.75  
127.91  
127.87  
124.08  
117.86

82.49  
80.91

61.47  
60.36  
52.55  
48.32  
47.88  
46.12  
43.16  
42.40  
37.36  
37.18  
33.87  
33.25  
31.37  
21.31  
21.12  
20.45  
14.17

— 2.20

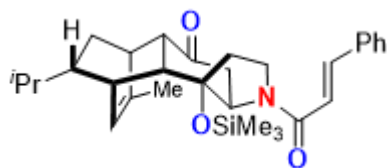

**19b**

<sup>13</sup>C NMR, CDCl<sub>3</sub>, 101 MHz

|                        |                     |
|------------------------|---------------------|
| Solvent                | CDCl <sub>3</sub>   |
| Temperature            | 296.6               |
| Pulse Sequence         | zgpg30              |
| Experiment             | 1D                  |
| Number of Scans        | 243                 |
| Receiver Gain          | 196.9               |
| Relaxation Delay       | 2.0000              |
| Pulse Width            | 9.7000              |
| Acquisition Time       | 1.2583              |
| Acquisition Date       | 2023-07-31T15:04:00 |
| Modification Date      | 2023-07-31T15:16:58 |
| Spectrometer Frequency | 100.62              |
| Spectral Width         | 26041.7             |
| Lowest Frequency       | -2963.8             |
| Nucleus                | 13C                 |
| Acquired Size          | 32768               |
| Spectral Size          | 65536               |
| Digital Resolution     | 0.40                |

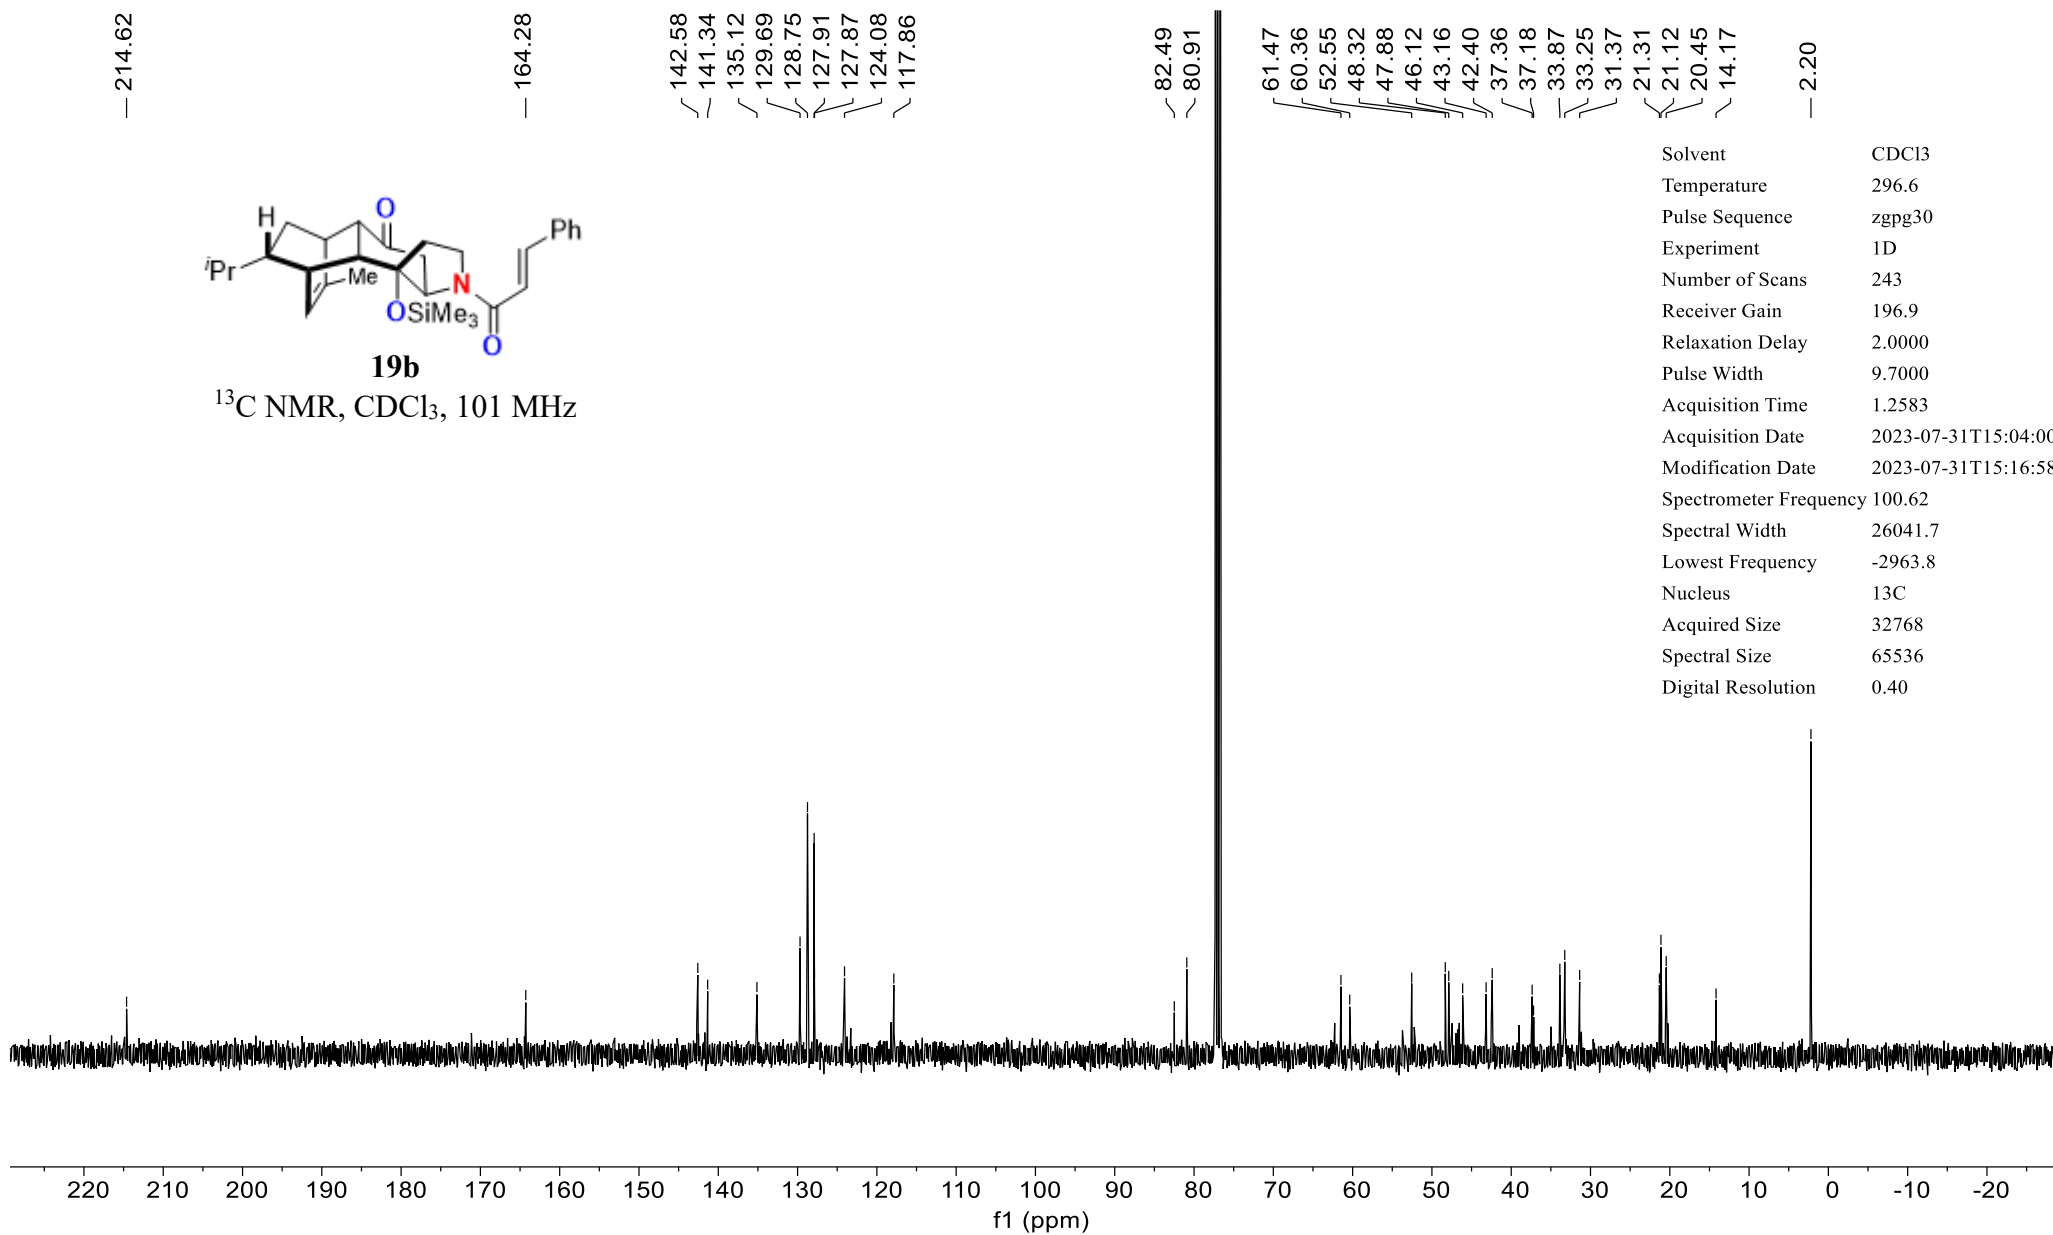

<sup>1</sup>H NMR of Sarglamide C (3)

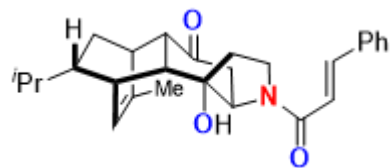

Sarglamide C (3)

<sup>1</sup>H NMR, CDCl<sub>3</sub>, 400 MHz

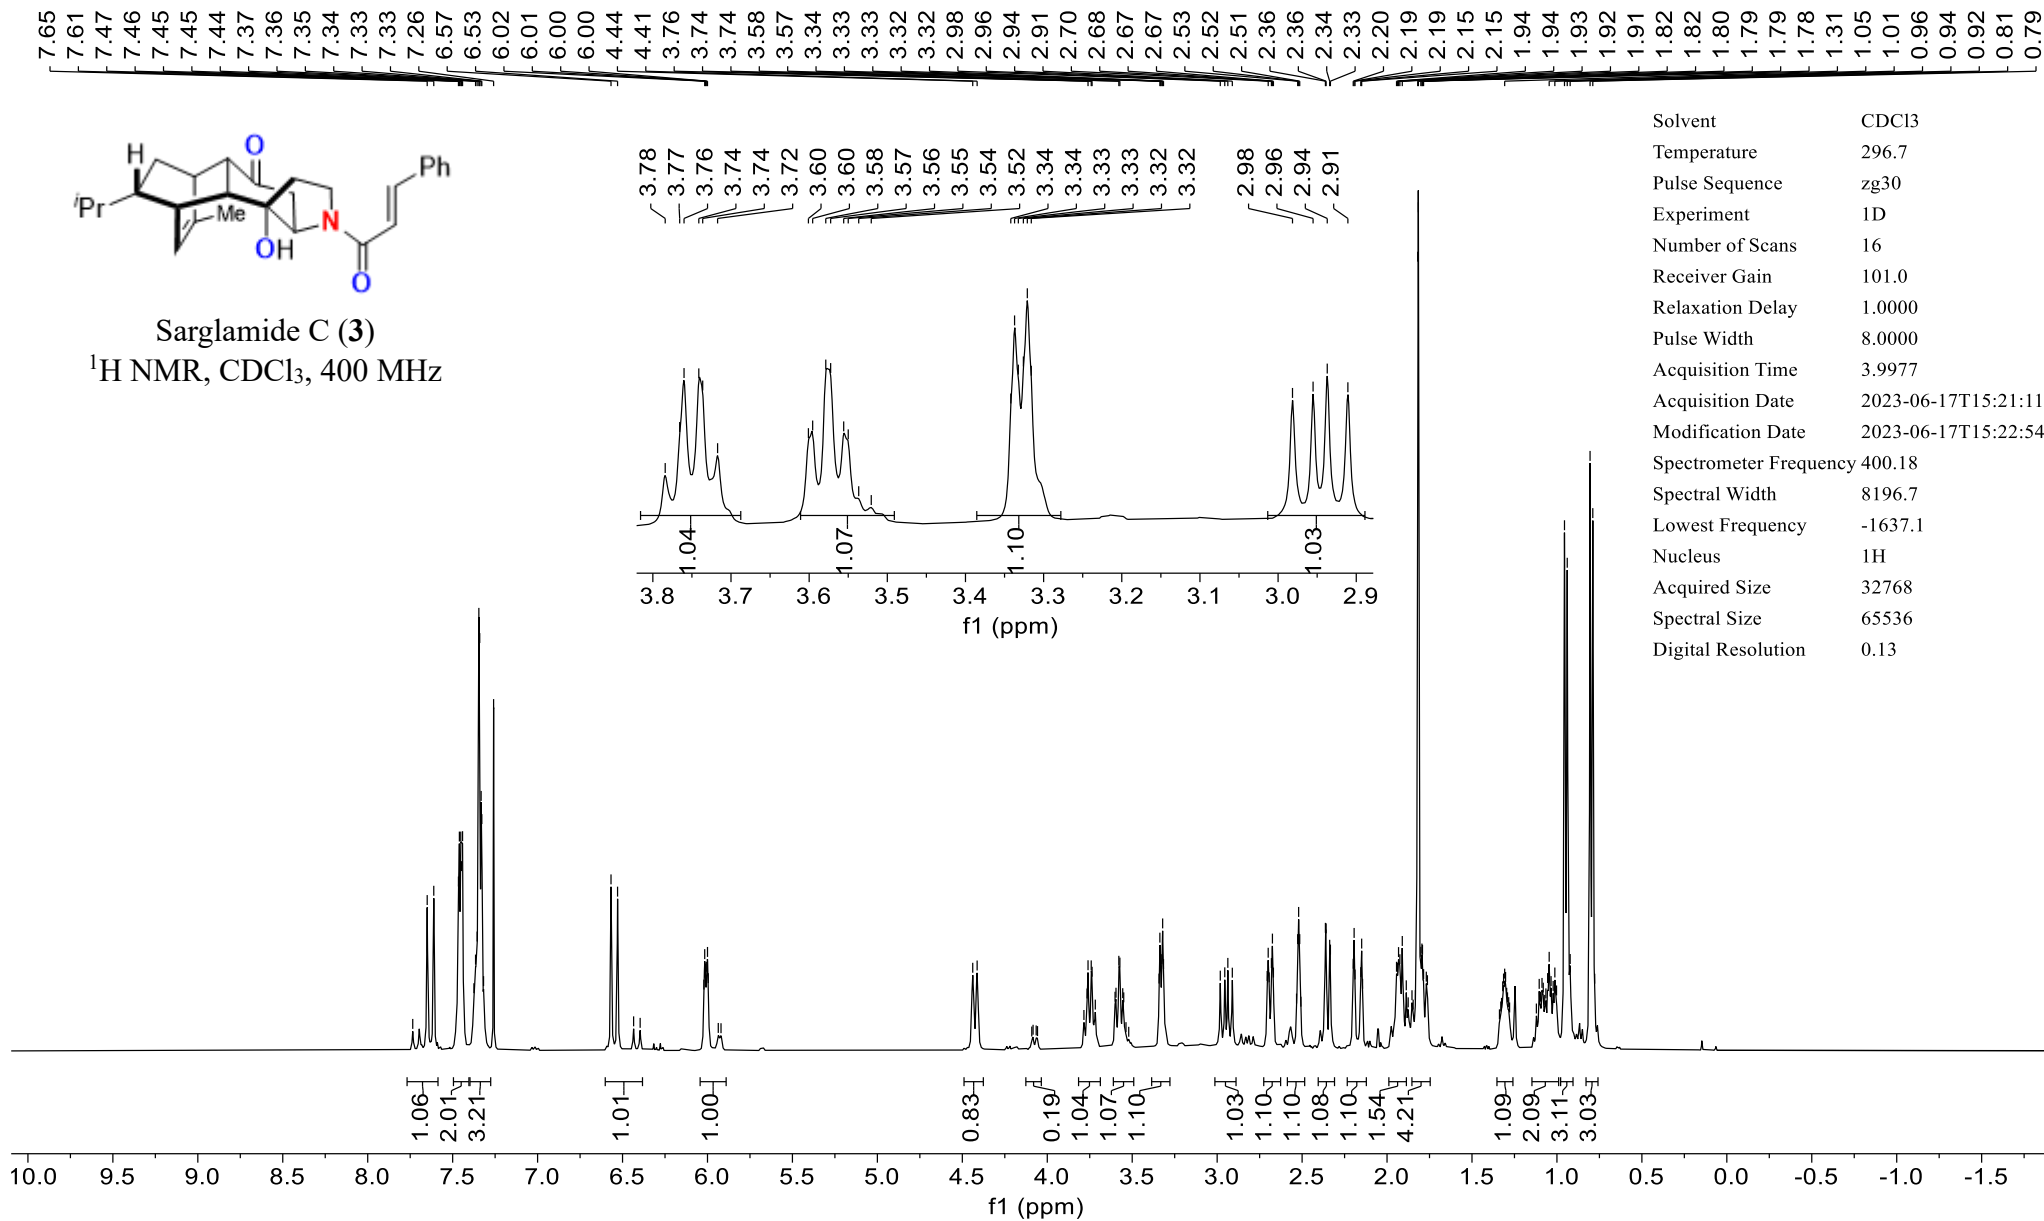

|                        |                     |
|------------------------|---------------------|
| Solvent                | CDCl <sub>3</sub>   |
| Temperature            | 296.7               |
| Pulse Sequence         | zg30                |
| Experiment             | 1D                  |
| Number of Scans        | 16                  |
| Receiver Gain          | 101.0               |
| Relaxation Delay       | 1.0000              |
| Pulse Width            | 8.0000              |
| Acquisition Time       | 3.9977              |
| Acquisition Date       | 2023-06-17T15:21:11 |
| Modification Date      | 2023-06-17T15:22:54 |
| Spectrometer Frequency | 400.18              |
| Spectral Width         | 8196.7              |
| Lowest Frequency       | -1637.1             |
| Nucleus                | <sup>1</sup> H      |
| Acquired Size          | 32768               |
| Spectral Size          | 65536               |
| Digital Resolution     | 0.13                |

#### 4.4 <sup>1</sup>H NMR of Sarglamide C (3)

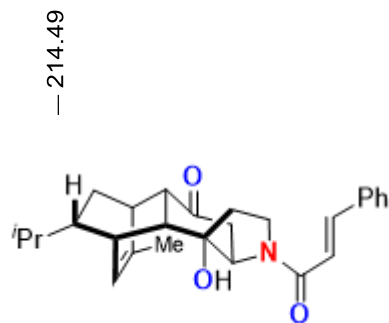

Sarglamide C (3)  
<sup>13</sup>C NMR, CDCl<sub>3</sub>, 101 MHz

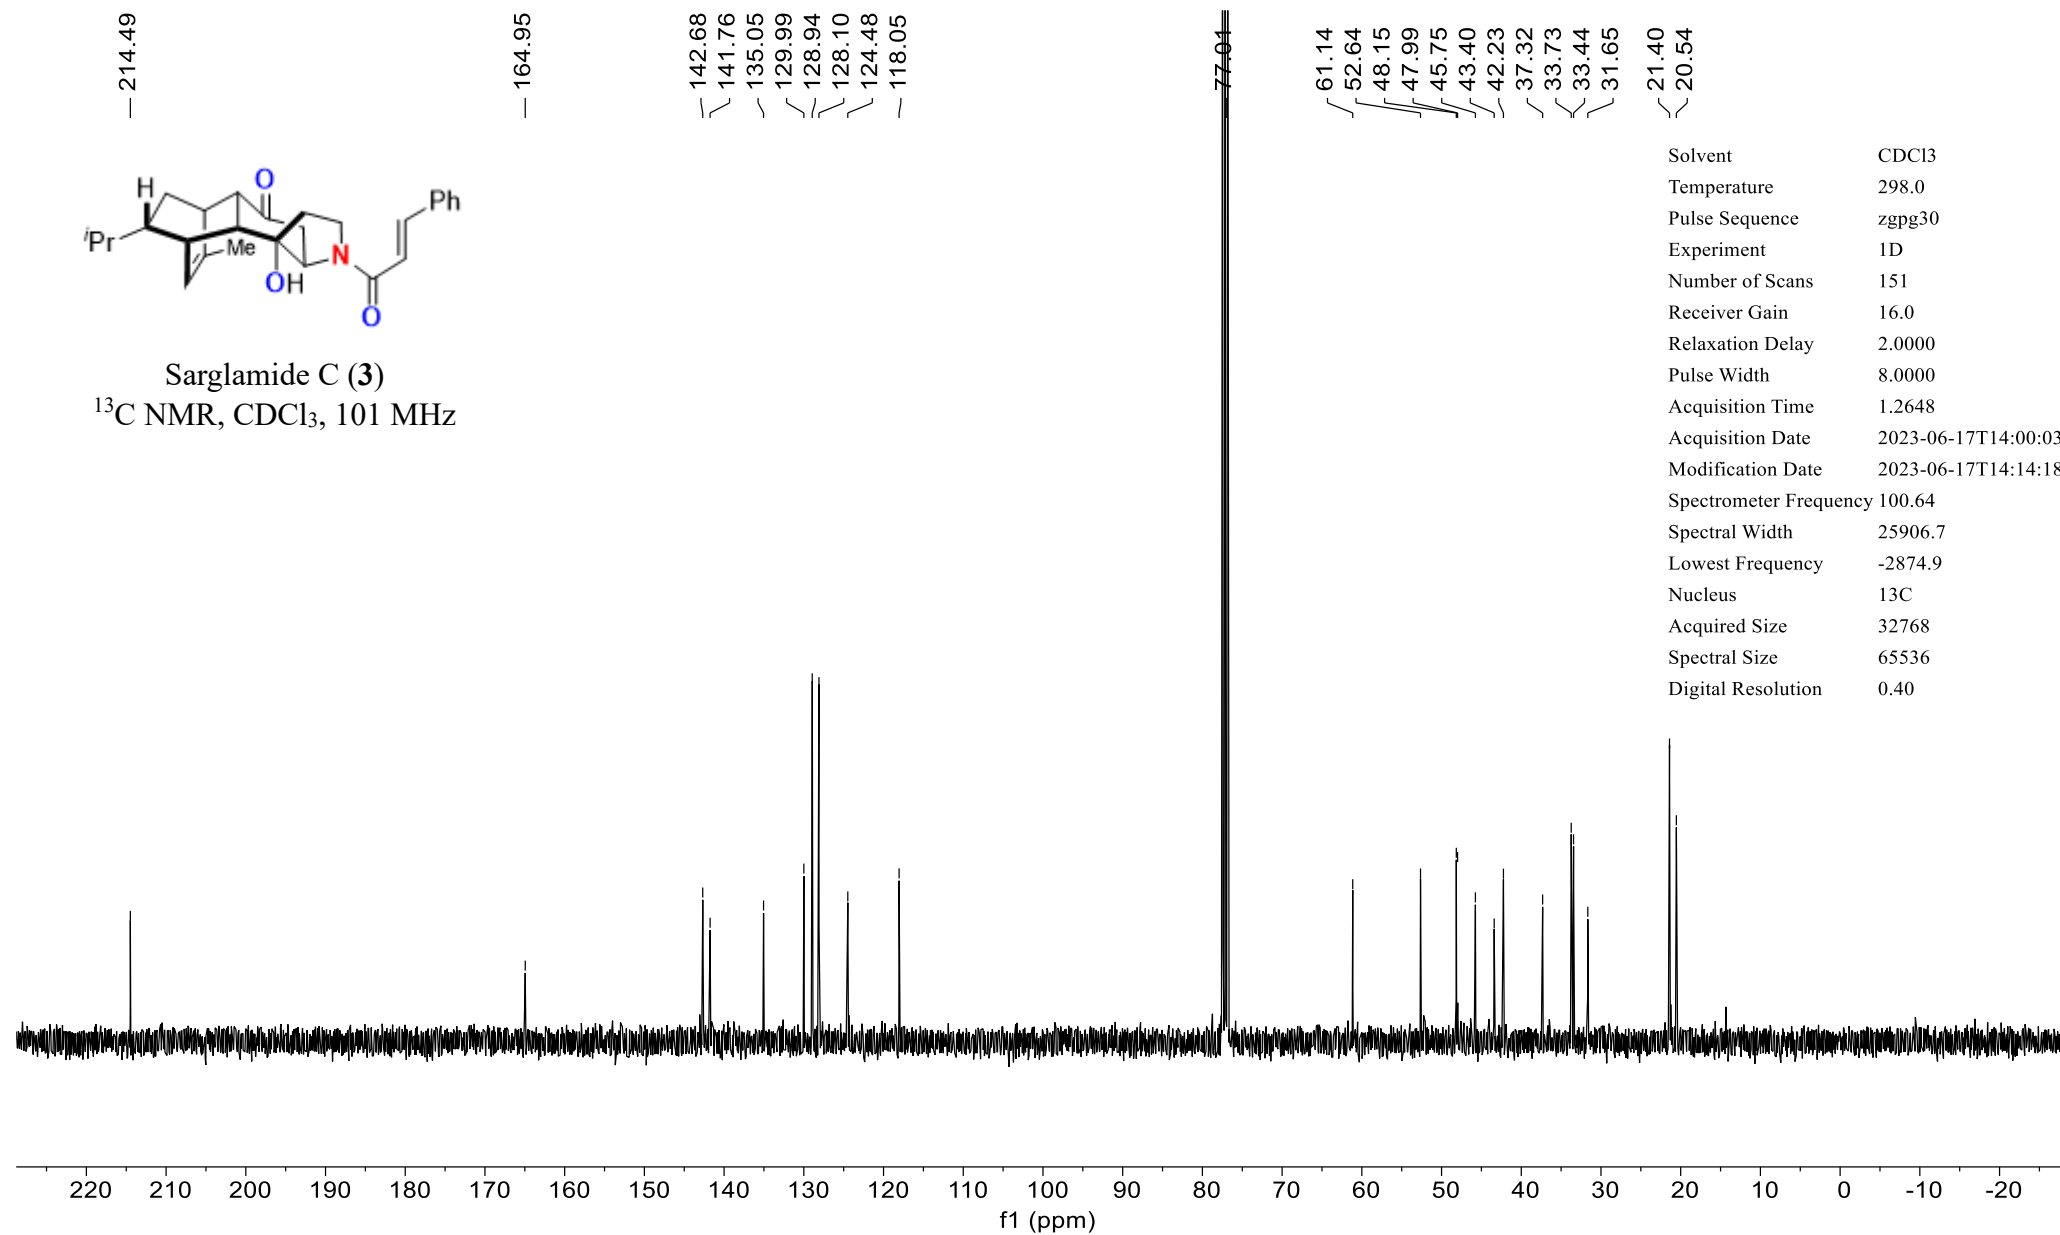

|                        |                     |
|------------------------|---------------------|
| Solvent                | CDCl <sub>3</sub>   |
| Temperature            | 298.0               |
| Pulse Sequence         | zgpg30              |
| Experiment             | 1D                  |
| Number of Scans        | 151                 |
| Receiver Gain          | 16.0                |
| Relaxation Delay       | 2.0000              |
| Pulse Width            | 8.0000              |
| Acquisition Time       | 1.2648              |
| Acquisition Date       | 2023-06-17T14:00:03 |
| Modification Date      | 2023-06-17T14:14:18 |
| Spectrometer Frequency | 100.64              |
| Spectral Width         | 25906.7             |
| Lowest Frequency       | -2874.9             |
| Nucleus                | 13C                 |
| Acquired Size          | 32768               |
| Spectral Size          | 65536               |
| Digital Resolution     | 0.40                |

<sup>1</sup>H NMR of **20**

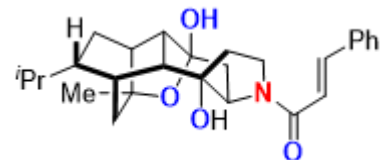

**20**

<sup>13</sup>C NMR, CDCl<sub>3</sub>, 101 MHz

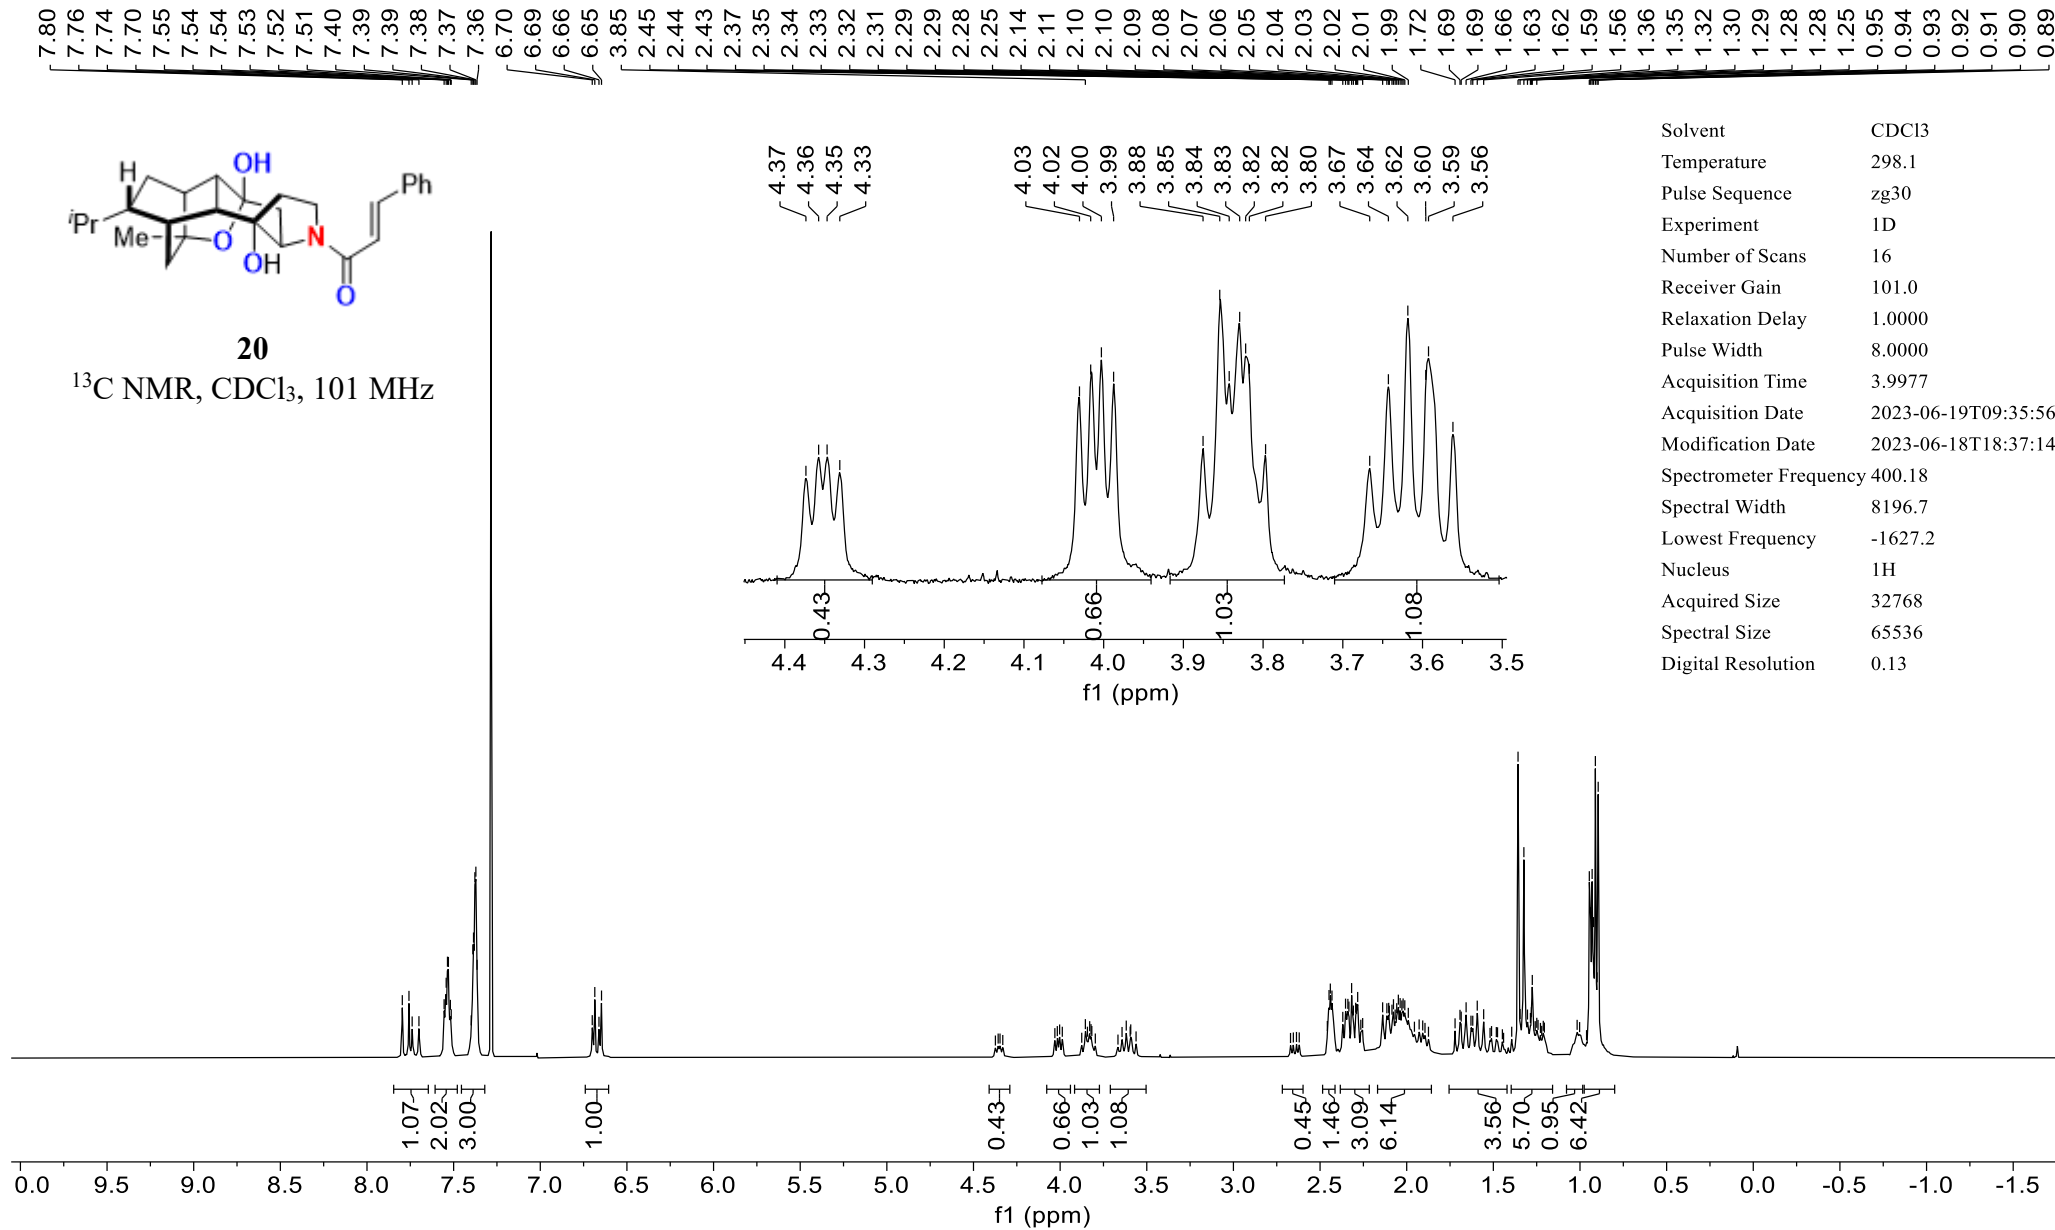

|                        |                     |
|------------------------|---------------------|
| Solvent                | CDCl <sub>3</sub>   |
| Temperature            | 298.1               |
| Pulse Sequence         | zg30                |
| Experiment             | 1D                  |
| Number of Scans        | 16                  |
| Receiver Gain          | 101.0               |
| Relaxation Delay       | 1.0000              |
| Pulse Width            | 8.0000              |
| Acquisition Time       | 3.9977              |
| Acquisition Date       | 2023-06-19T09:35:56 |
| Modification Date      | 2023-06-18T18:37:14 |
| Spectrometer Frequency | 400.18              |
| Spectral Width         | 8196.7              |
| Lowest Frequency       | -1627.2             |
| Nucleus                | <sup>1</sup> H      |
| Acquired Size          | 32768               |
| Spectral Size          | 65536               |
| Digital Resolution     | 0.13                |

<sup>13</sup>C NMR of **20**

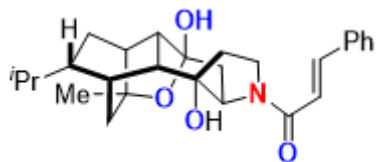

**20**

<sup>13</sup>C NMR, CDCl<sub>3</sub>, 101 MHz

- 165.18
- 142.78
- 135.21
- 135.07
- 129.69
- 128.78
- 128.75
- 128.11
- 127.94
- 118.18
- 117.89
- 101.13
- 82.81
- 82.42
- 78.36
- 77.23
- 76.85
- 61.27
- 60.30
- 46.46
- 46.35
- 45.41
- 45.36
- 44.50
- 42.66
- 42.15
- 41.61
- 39.53
- 37.87
- 37.53
- 36.69
- 35.06
- 34.82
- 32.89
- 26.43
- 26.25
- 24.86
- 23.97
- 21.01
- 20.80

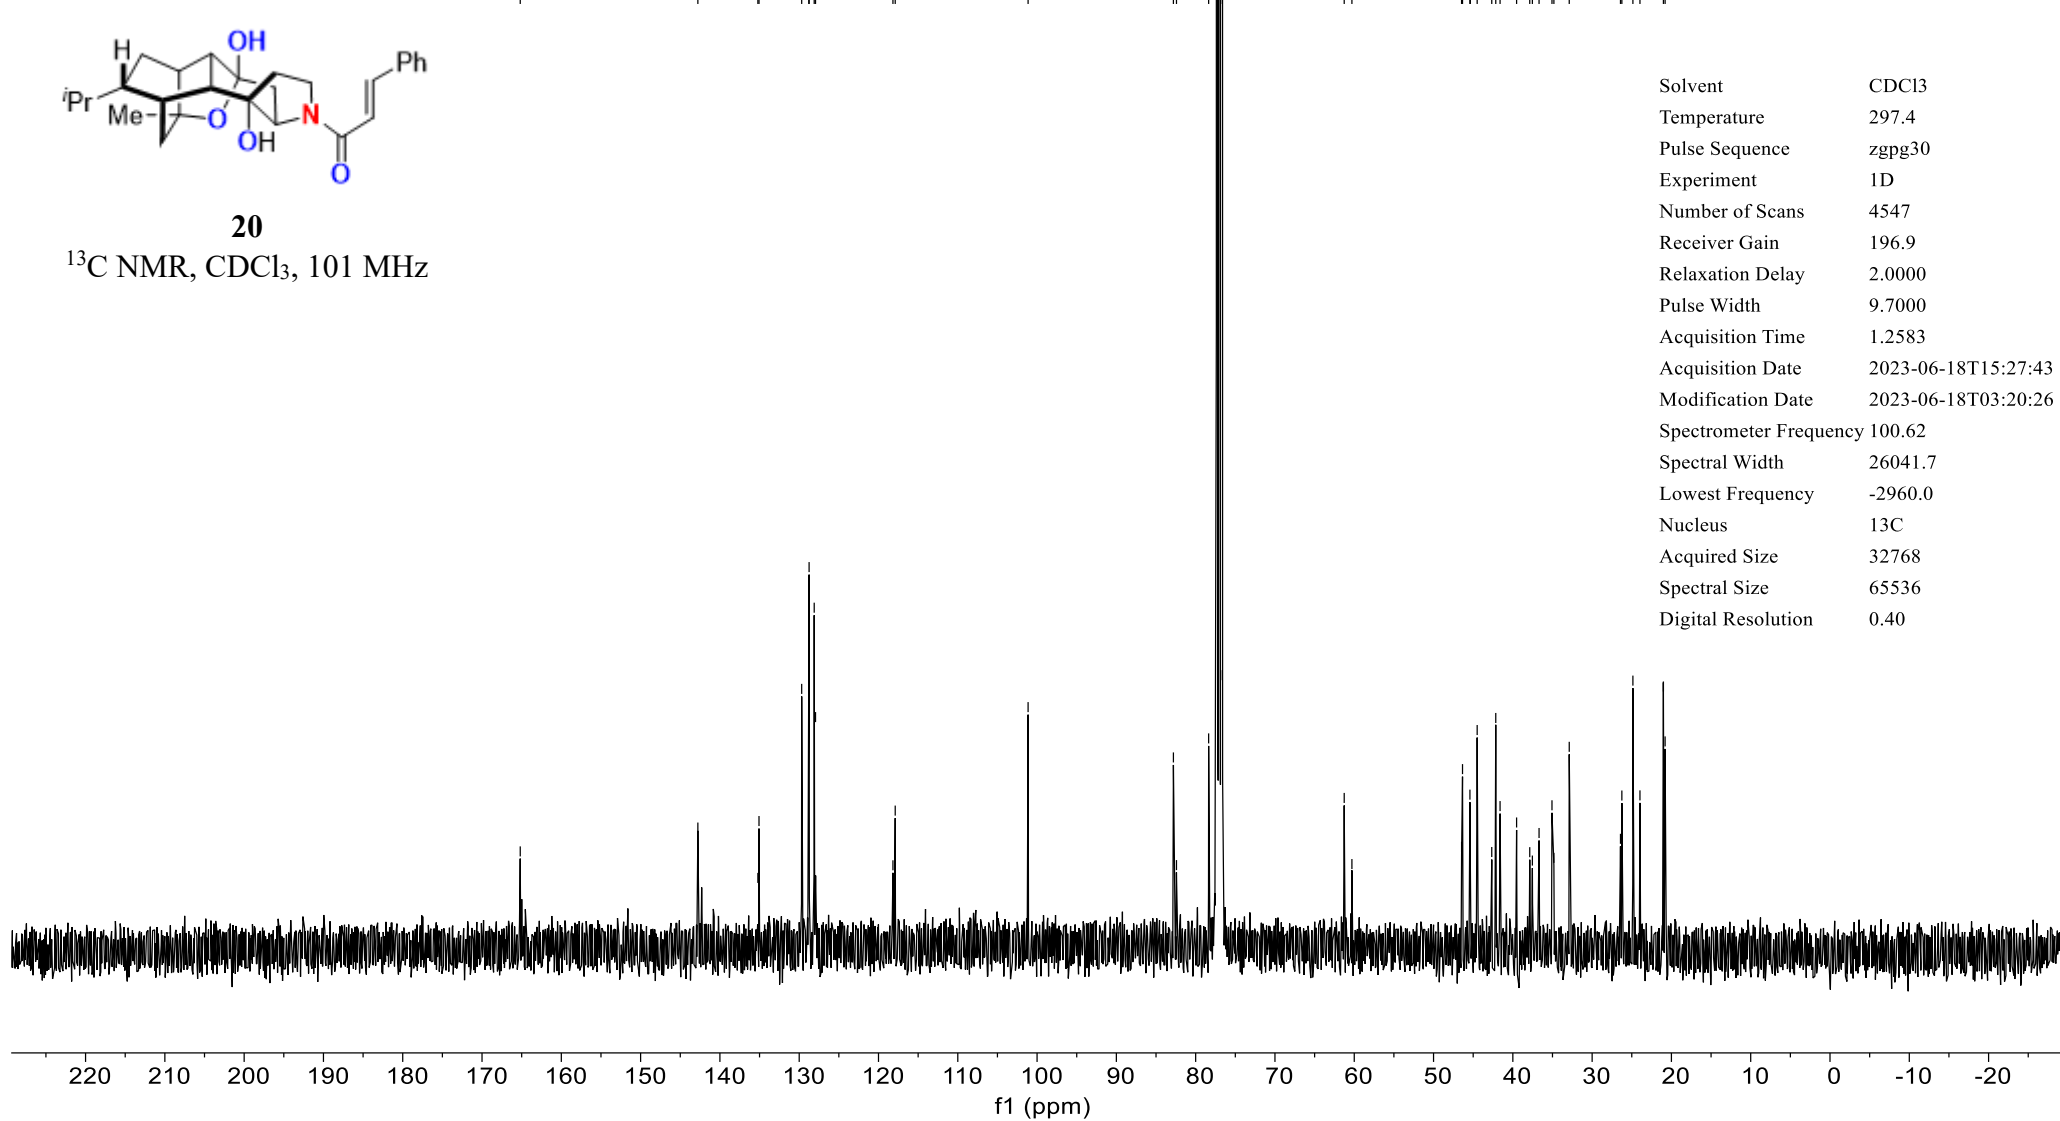

|                        |                     |
|------------------------|---------------------|
| Solvent                | CDCl <sub>3</sub>   |
| Temperature            | 297.4               |
| Pulse Sequence         | zgpg30              |
| Experiment             | 1D                  |
| Number of Scans        | 4547                |
| Receiver Gain          | 196.9               |
| Relaxation Delay       | 2.0000              |
| Pulse Width            | 9.7000              |
| Acquisition Time       | 1.2583              |
| Acquisition Date       | 2023-06-18T15:27:43 |
| Modification Date      | 2023-06-18T03:20:26 |
| Spectrometer Frequency | 100.62              |
| Spectral Width         | 26041.7             |
| Lowest Frequency       | -2960.0             |
| Nucleus                | 13C                 |
| Acquired Size          | 32768               |
| Spectral Size          | 65536               |
| Digital Resolution     | 0.40                |

# <sup>1</sup>H NMR of Sarglamide D (4)

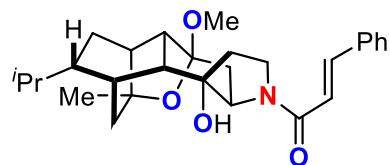

Sarglamide D (4)

<sup>1</sup>H NMR, CDCl<sub>3</sub>, 400 MHz

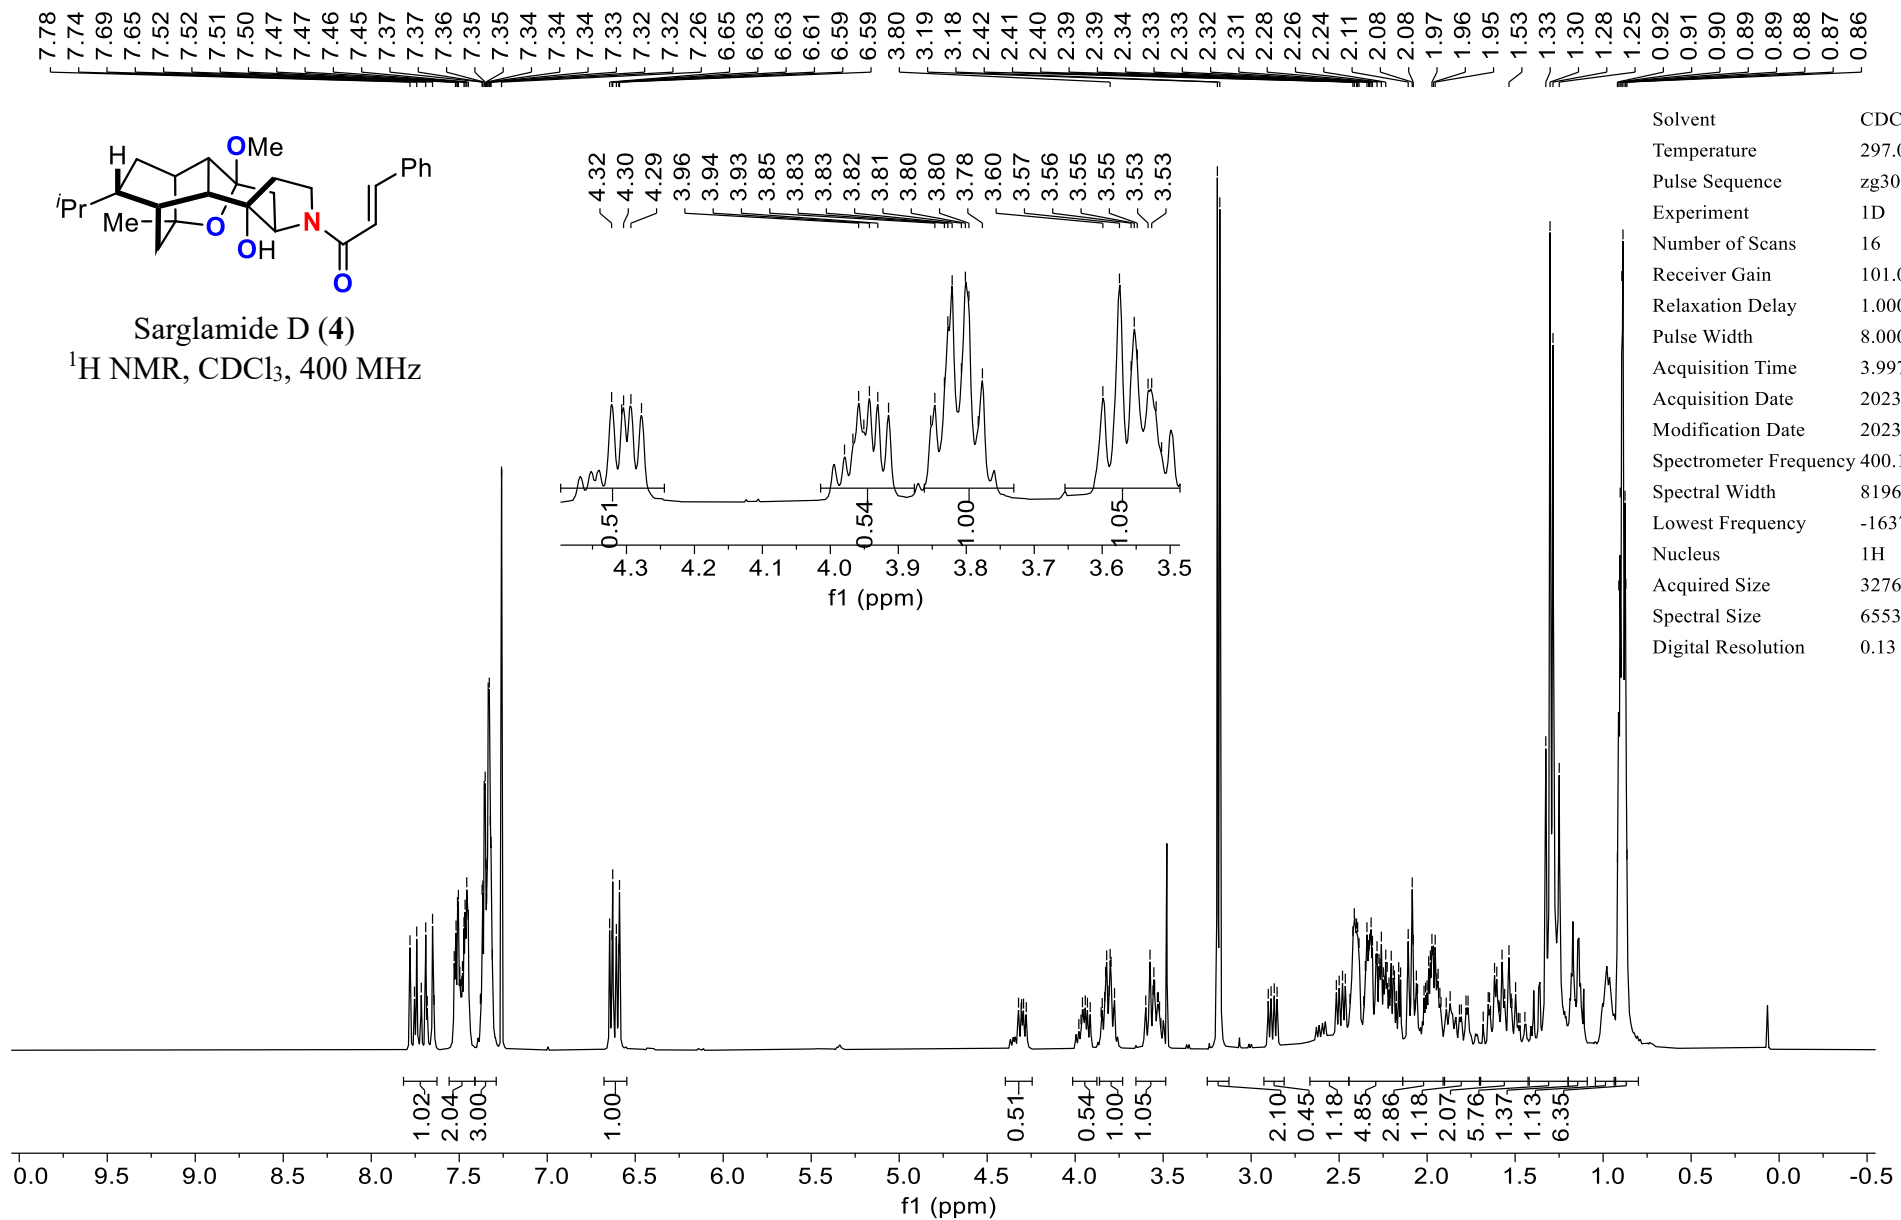

<sup>13</sup>C NMR of Sarglamide D (4)

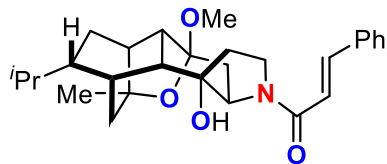

Sarglamide D (4)

<sup>13</sup>C NMR, CDCl<sub>3</sub>, 101 MHz

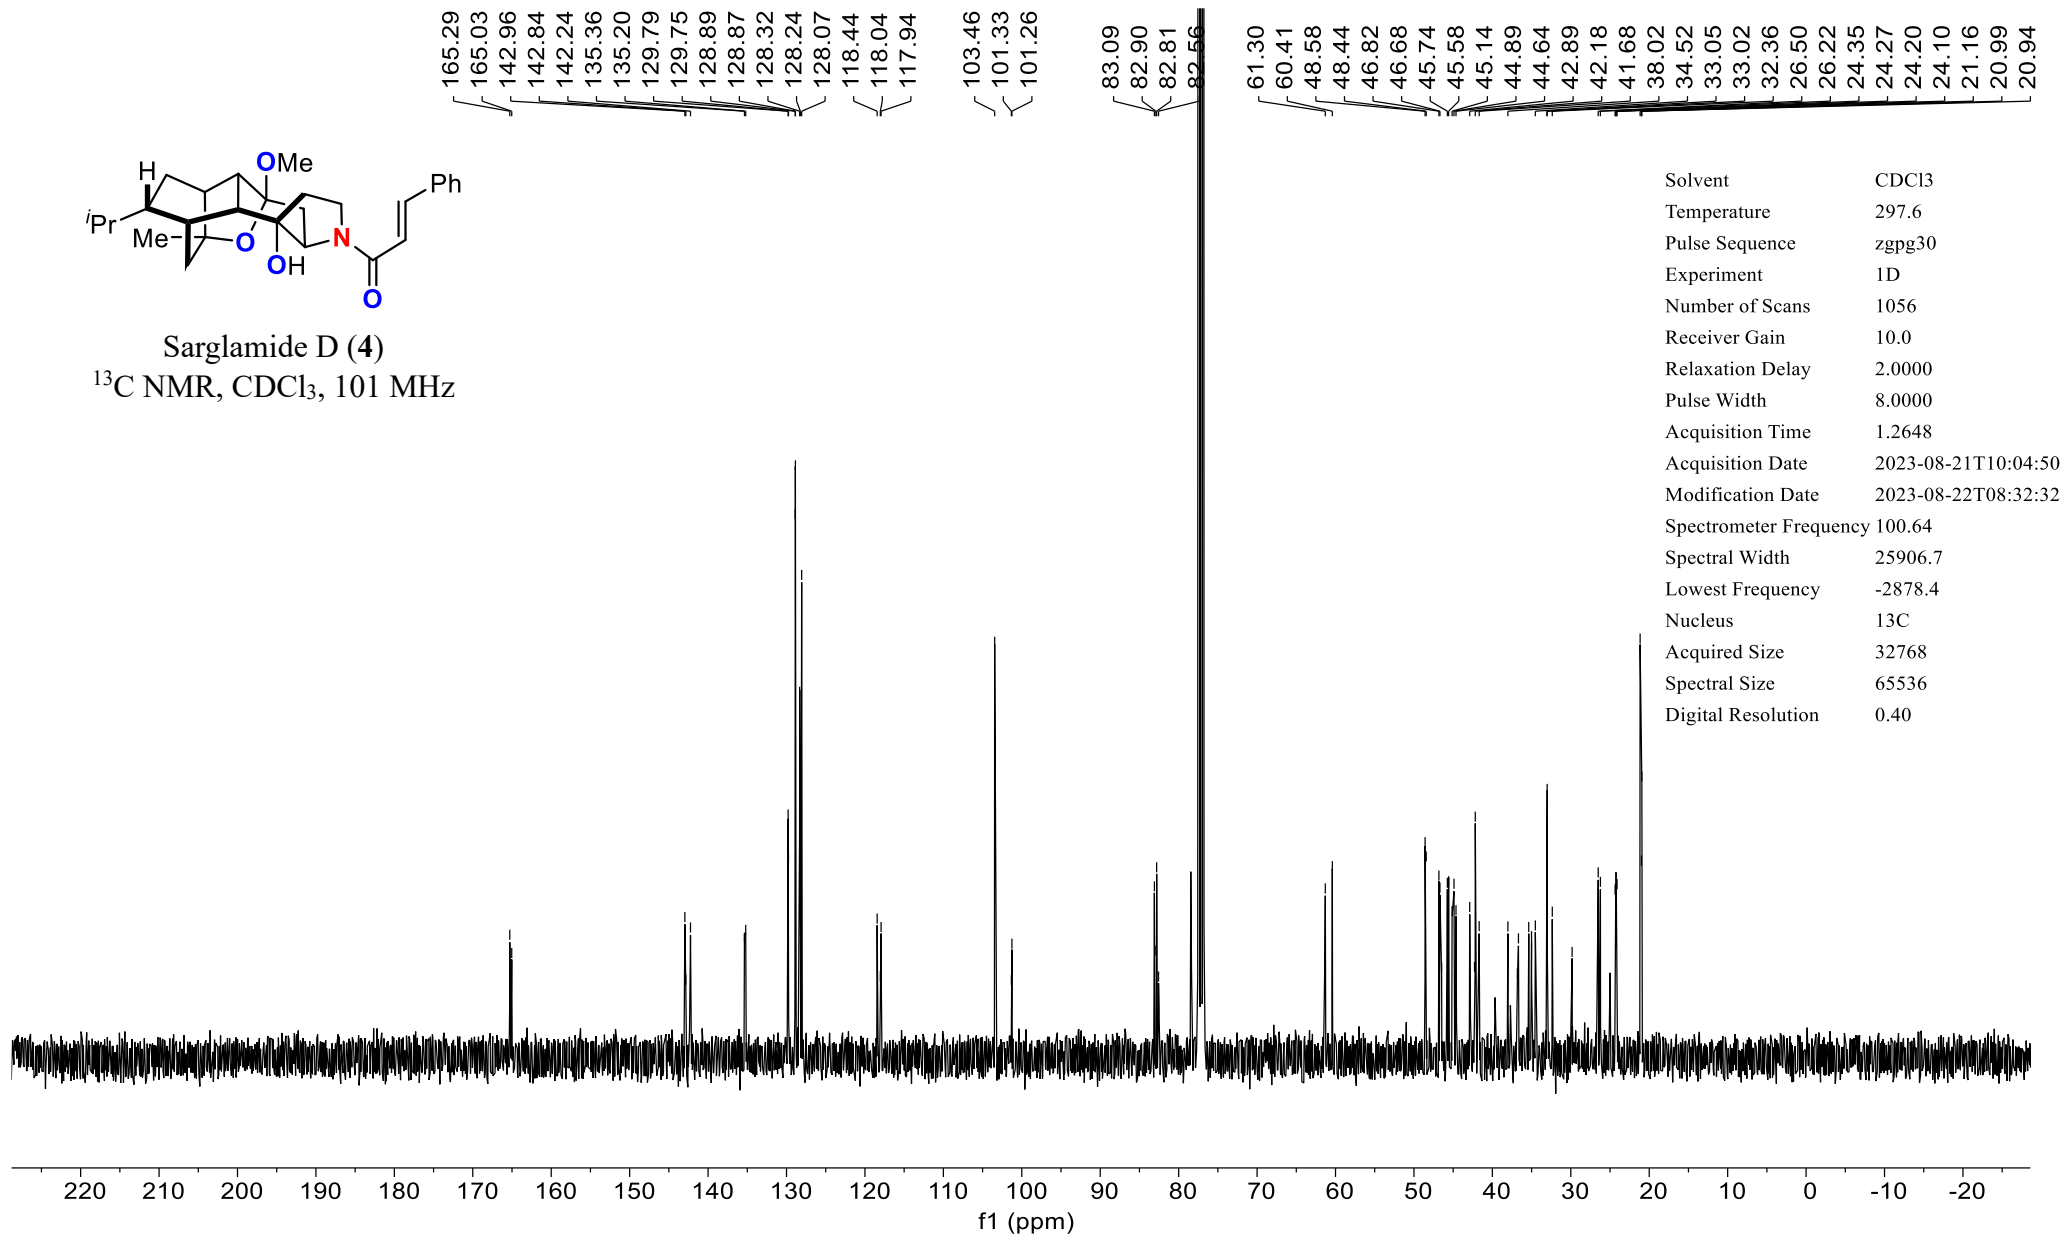

|                        |                     |
|------------------------|---------------------|
| Solvent                | CDCl <sub>3</sub>   |
| Temperature            | 297.6               |
| Pulse Sequence         | zgpg30              |
| Experiment             | 1D                  |
| Number of Scans        | 1056                |
| Receiver Gain          | 10.0                |
| Relaxation Delay       | 2.0000              |
| Pulse Width            | 8.0000              |
| Acquisition Time       | 1.2648              |
| Acquisition Date       | 2023-08-21T10:04:50 |
| Modification Date      | 2023-08-22T08:32:32 |
| Spectrometer Frequency | 100.64              |
| Spectral Width         | 25906.7             |
| Lowest Frequency       | -2878.4             |
| Nucleus                | <sup>13</sup> C     |
| Acquired Size          | 32768               |
| Spectral Size          | 65536               |
| Digital Resolution     | 0.40                |

<sup>1</sup>H NMR of **10c**

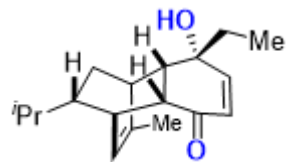

**10c**

<sup>1</sup>H NMR, CDCl<sub>3</sub>, 400 MHz

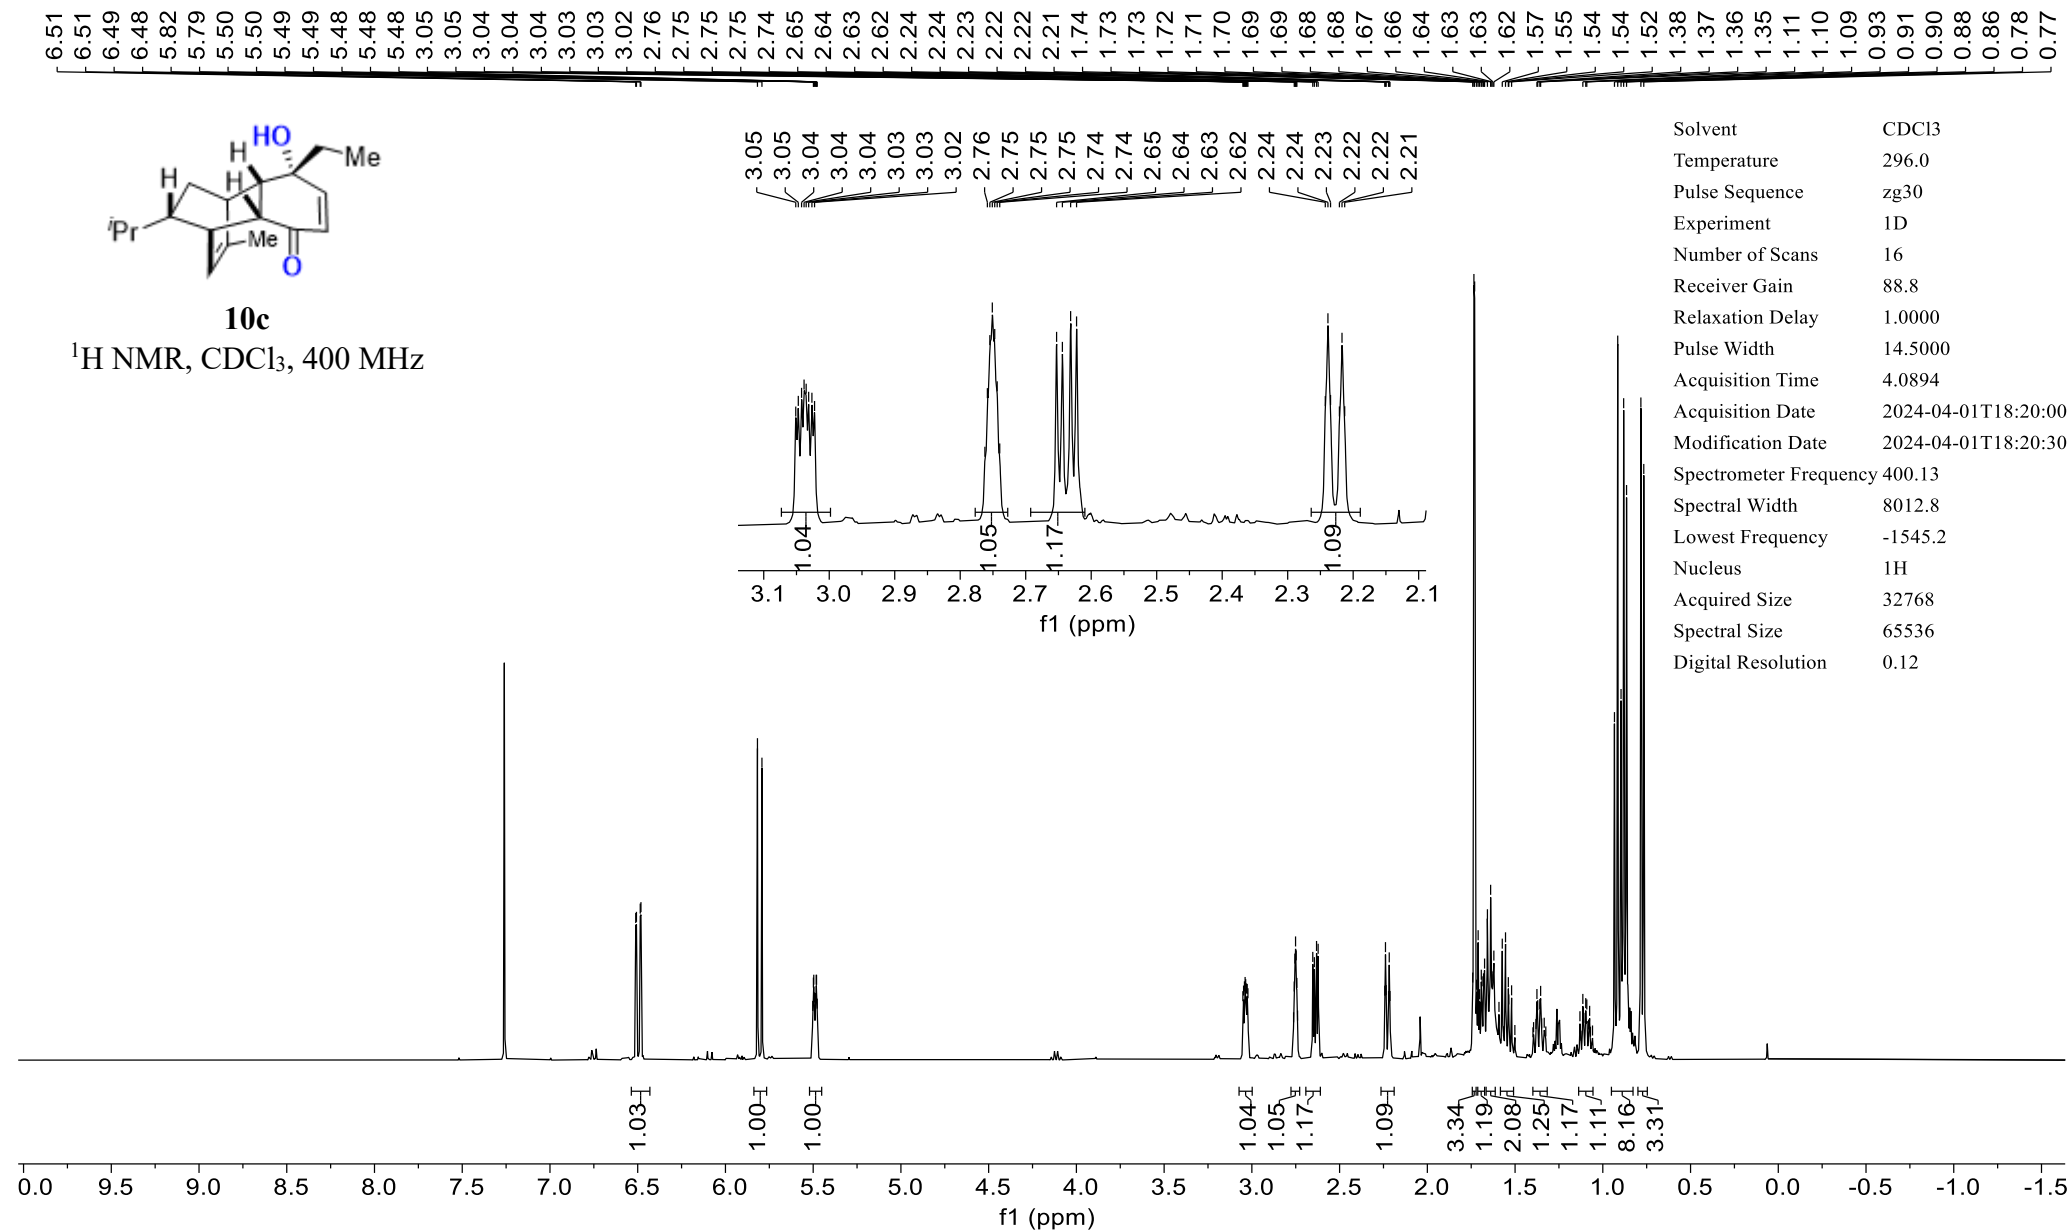

|                        |                     |
|------------------------|---------------------|
| Solvent                | CDCl <sub>3</sub>   |
| Temperature            | 296.0               |
| Pulse Sequence         | zg30                |
| Experiment             | 1D                  |
| Number of Scans        | 16                  |
| Receiver Gain          | 88.8                |
| Relaxation Delay       | 1.0000              |
| Pulse Width            | 14.5000             |
| Acquisition Time       | 4.0894              |
| Acquisition Date       | 2024-04-01T18:20:00 |
| Modification Date      | 2024-04-01T18:20:30 |
| Spectrometer Frequency | 400.13              |
| Spectral Width         | 8012.8              |
| Lowest Frequency       | -1545.2             |
| Nucleus                | <sup>1</sup> H      |
| Acquired Size          | 32768               |
| Spectral Size          | 65536               |
| Digital Resolution     | 0.12                |



<sup>13</sup>C NMR of **10c**

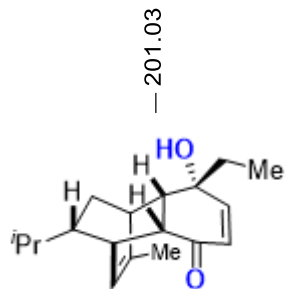

**10c**

<sup>13</sup>H NMR, CDCl<sub>3</sub>, 101 MHz

— 201.03  
— 151.61  
— 143.75  
— 130.11  
— 122.49

— 72.26

51.04  
44.87  
44.16  
39.98  
39.69  
36.30  
34.52  
33.28  
21.18  
20.53  
20.21

— 7.39

|                        |                     |
|------------------------|---------------------|
| Solvent                | CDCl <sub>3</sub>   |
| Temperature            | 296.4               |
| Pulse Sequence         | zgpg30              |
| Experiment             | 1D                  |
| Number of Scans        | 188                 |
| Receiver Gain          | 196.9               |
| Relaxation Delay       | 2.0000              |
| Pulse Width            | 9.7000              |
| Acquisition Time       | 1.2583              |
| Acquisition Date       | 2024-04-01T18:25:00 |
| Modification Date      | 2024-04-01T18:35:46 |
| Spectrometer Frequency | 100.62              |
| Spectral Width         | 26041.7             |
| Lowest Frequency       | -2962.2             |
| Nucleus                | 13C                 |
| Acquired Size          | 32768               |
| Spectral Size          | 65536               |
| Digital Resolution     | 0.40                |

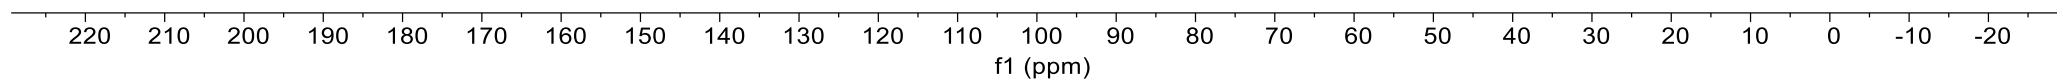

# <sup>1</sup>H NMR of 9c

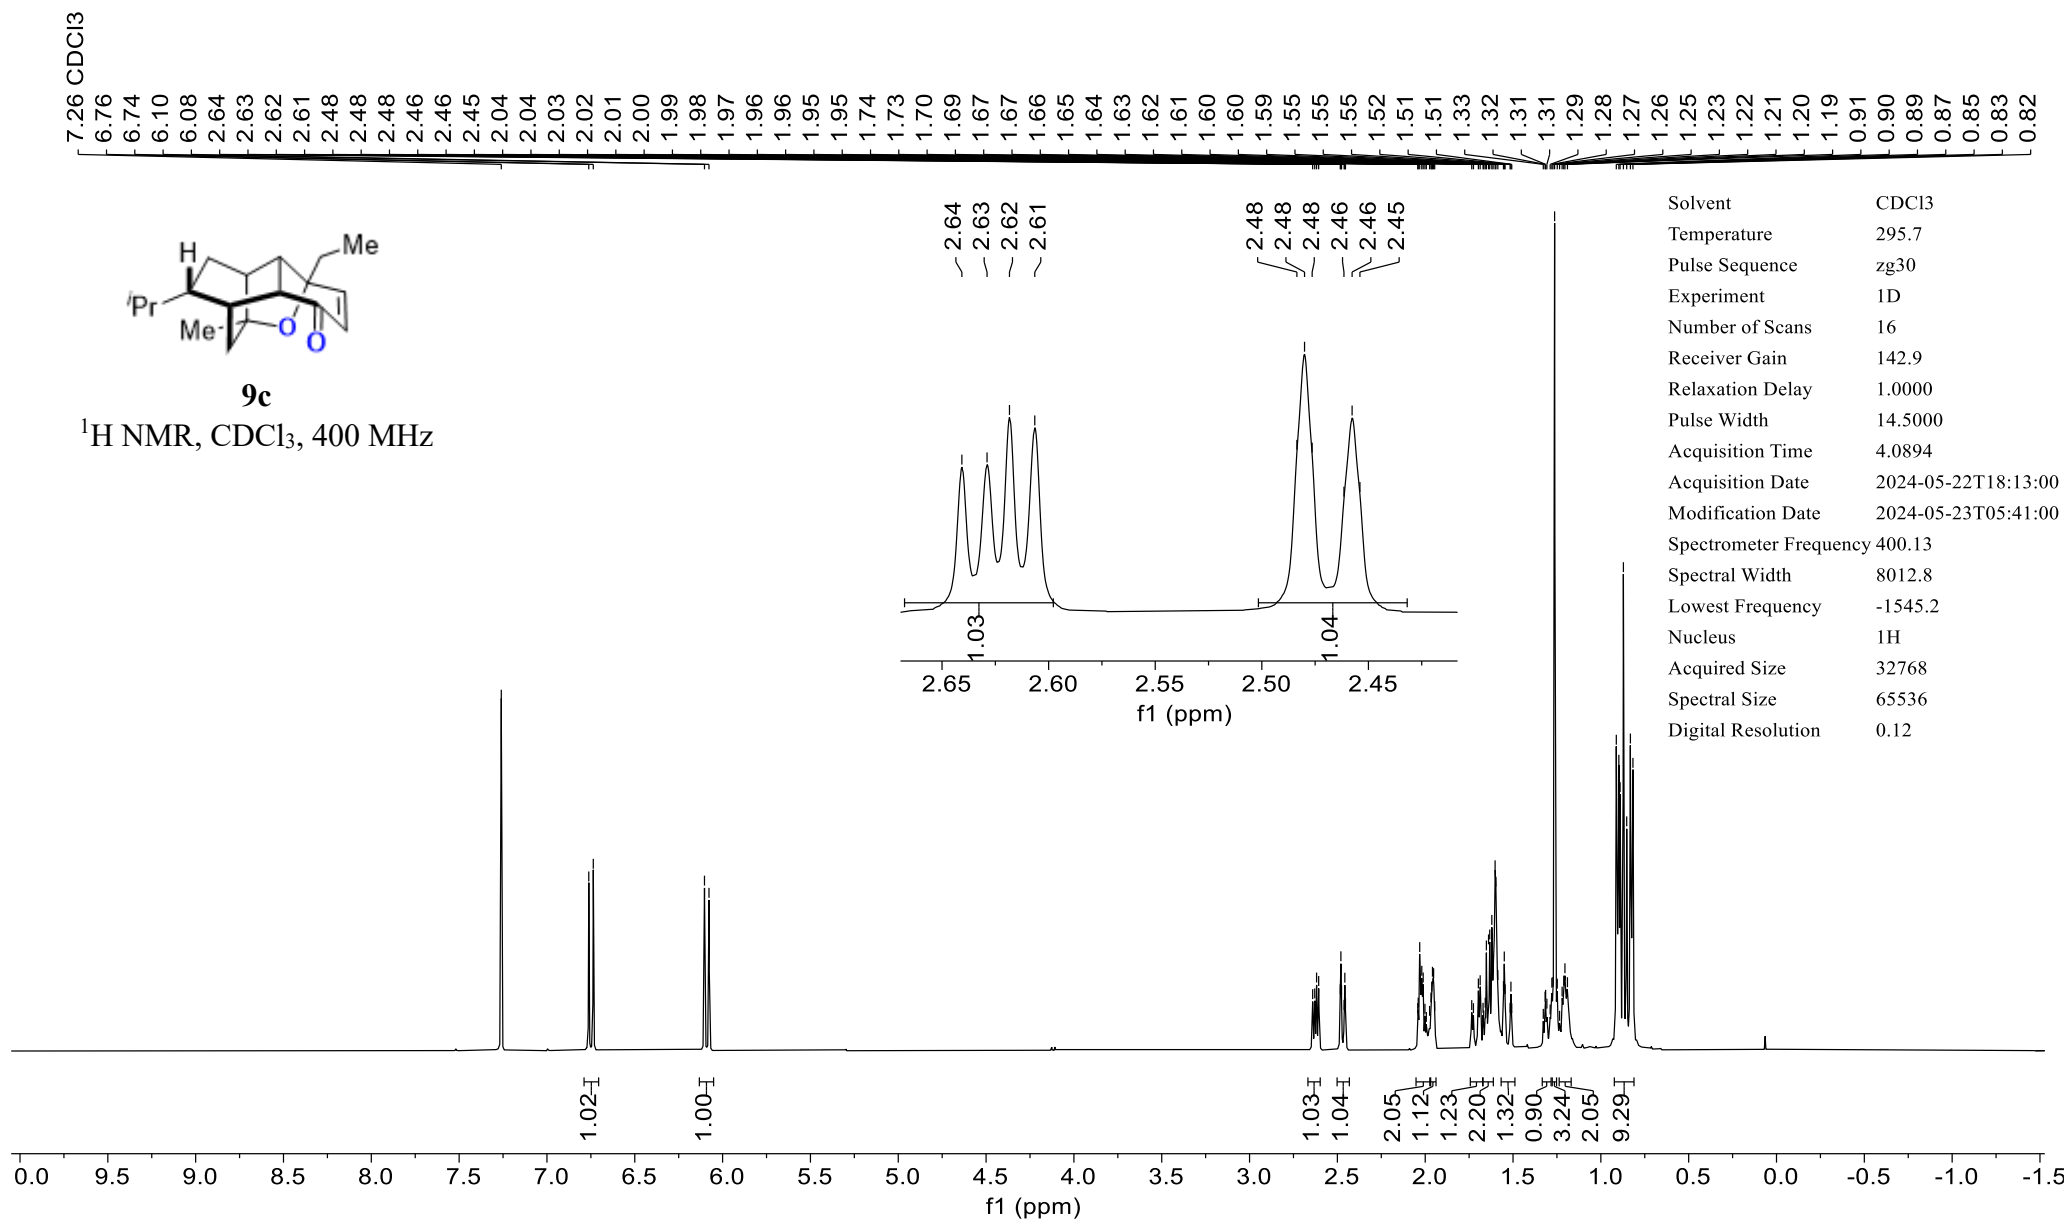

<sup>13</sup>C NMR of **9c**

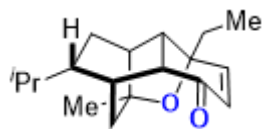

**9c**

<sup>1</sup>H NMR, CDCl<sub>3</sub>, 400 MHz

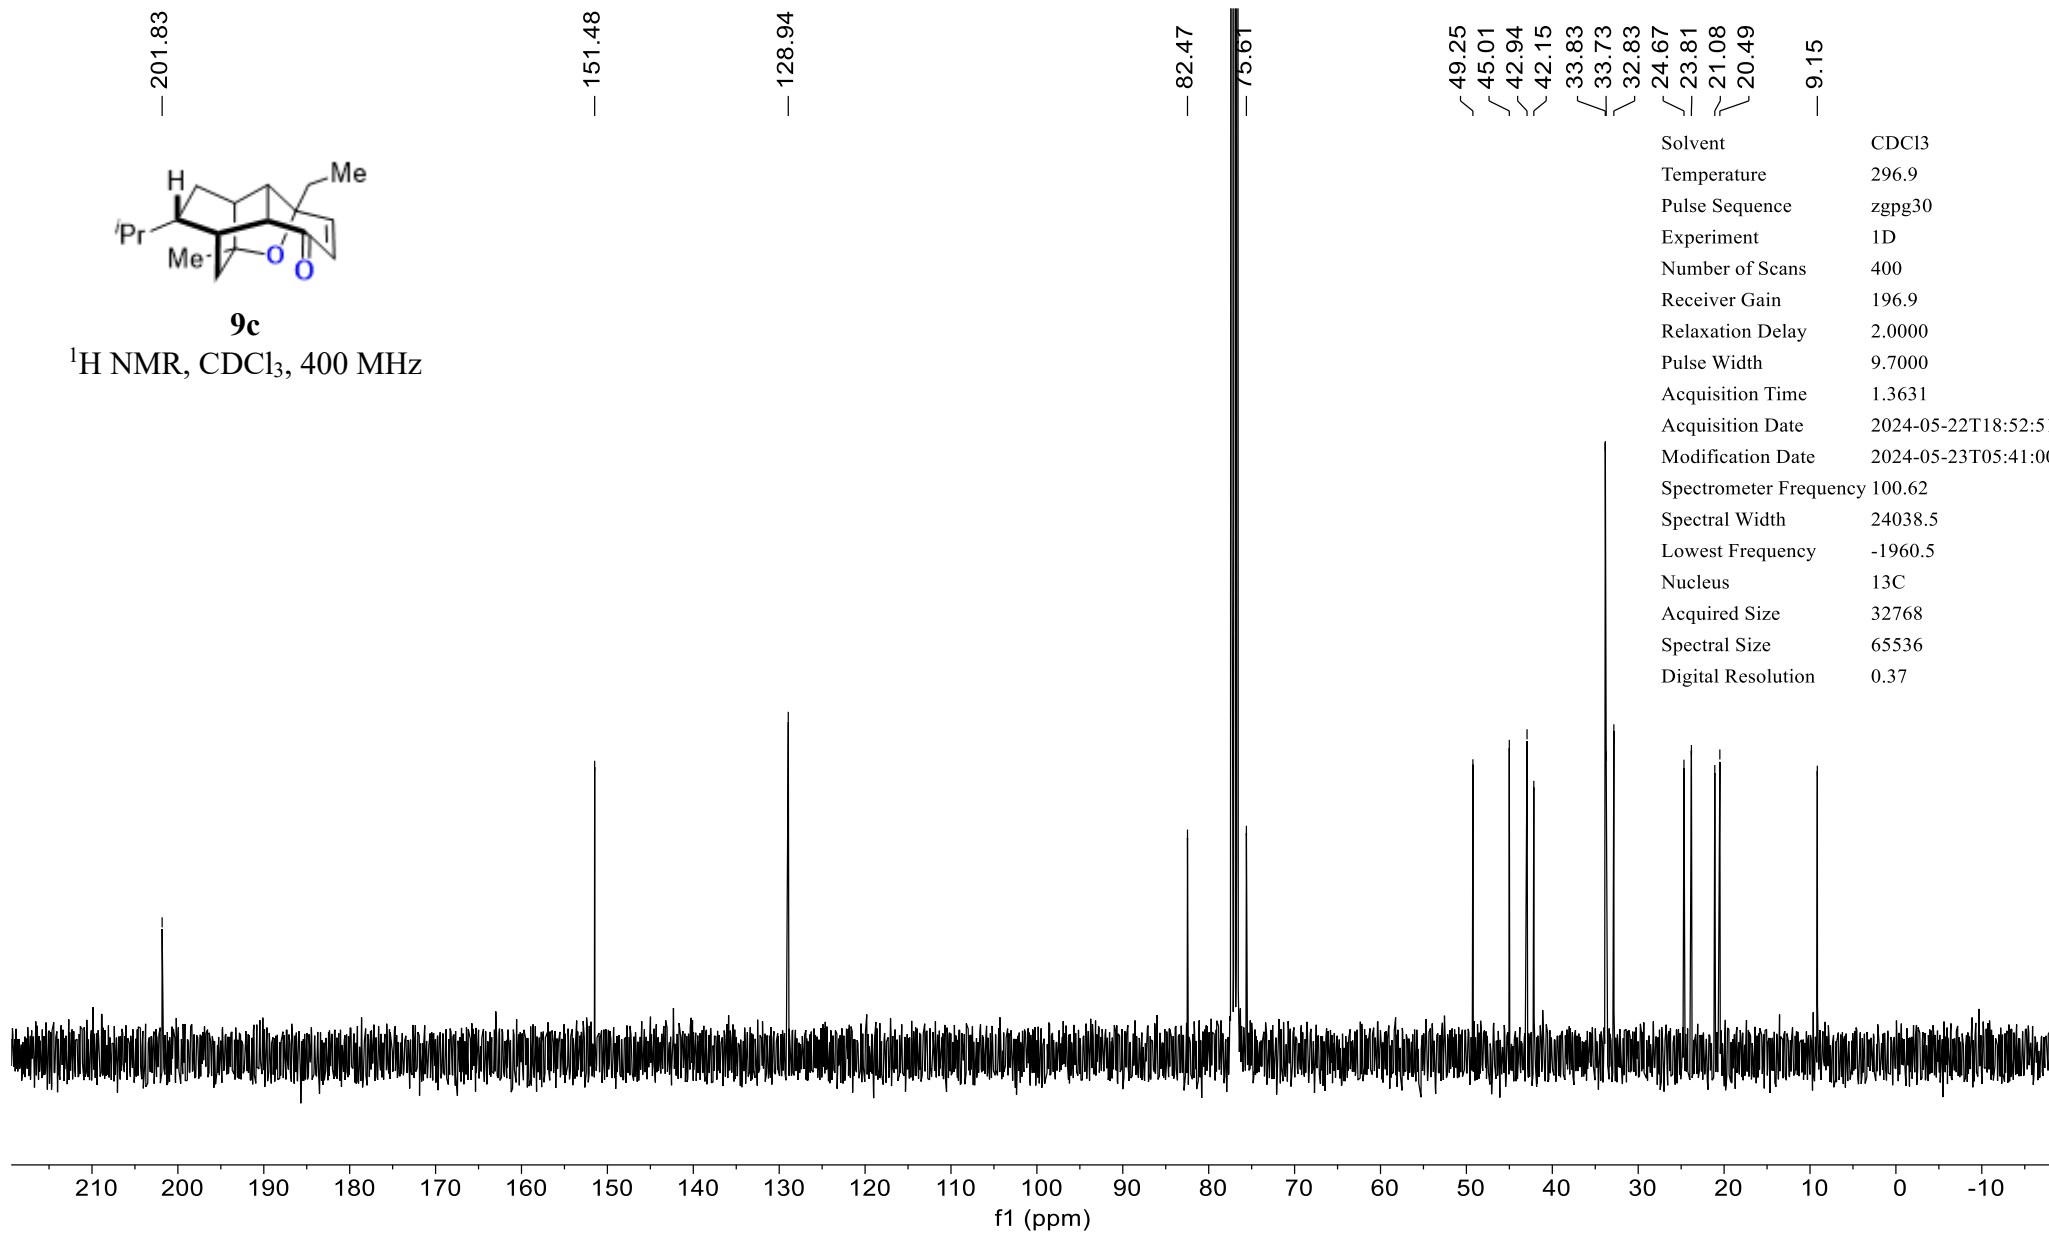

|                        |                     |
|------------------------|---------------------|
| Solvent                | CDCl <sub>3</sub>   |
| Temperature            | 296.9               |
| Pulse Sequence         | zgpg30              |
| Experiment             | 1D                  |
| Number of Scans        | 400                 |
| Receiver Gain          | 196.9               |
| Relaxation Delay       | 2.0000              |
| Pulse Width            | 9.7000              |
| Acquisition Time       | 1.3631              |
| Acquisition Date       | 2024-05-22T18:52:51 |
| Modification Date      | 2024-05-23T05:41:00 |
| Spectrometer Frequency | 100.62              |
| Spectral Width         | 24038.5             |
| Lowest Frequency       | -1960.5             |
| Nucleus                | <sup>13</sup> C     |
| Acquired Size          | 32768               |
| Spectral Size          | 65536               |
| Digital Resolution     | 0.37                |
